# Supplementary material for: Global consequences of long-term mineral fertilization on soil microbiomes
Source: Research Square preprint supplement (doi:10.21203/rs.3.rs-7587066/v1), 2025-09-19
Supplement: Supplementary file 1 [file 8169a8e0f845751f31ff3b79.docx]

*Supporting Information*

**Global consequences of long-term mineral fertilization on soil microbiomes**

Shengwen Xu1, 2, Manuel Delgado-Baquerizo2*, Yongxiang Yu1, Haoxin Fan1, Limei Zhang3, Xiaoyan Tang4, Zhi Zhang5, Shuai Wu6, Nataliya Bilyera7, Yakov Kuzyakov8, Christoph C. Tebbe9, Graeme W. Nicol10, Joann K. Whalen11, 12, Huaiying Yao1, 13**

*1 Hubei Key Laboratory of Microbial Transformation and Regulation of Biogenic Elements in the Middle Reaches of the Yangtze River, School of Environmental Ecology and Biological Engineering, Wuhan Institute of Technology, Wuhan 430205, China*

*2 Laboratorio de Biodiversidad y Funcionamiento Ecosistémico, Instituto de Recursos Naturales y Agrobiología de Sevilla (IRNAS), Consejo Superior de Investigaciones Científicas (CSIC), Av. Reina Mercedes 10, E-41012, Sevilla, Spain*

*3 State Key Laboratory of Urban and Regional Ecology, Research Center for Eco-Environmental Sciences, Chinese Academy of Sciences, Beijing 100085, China*

*4 College of Resources, Sichuan Agricultural University, Chengdu 611130, China*

*5 School of Geography and Tourism, Shaanxi Normal University, Xi'an 710119, China*

*6 College of Hydrology and Water Resources, Hohai University, Nanjing 210098, China*

*7 Geo-Biosphere Interactions, Department of Geosciences, University of Tübingen, 72076 Tübingen, Germany*

*8 Department of Soil Science of Temperate Ecosystems, Department of Agricultural Soil Science, University of Goettingen, 37077 Göttingen, Germany*

*9 Thünen Institute of Biodiversity, Bundesallee 65, 38116 Braunschweig, Germany*

*10 Université Claude Bernard Lyon 1, CNRS, INRAE, VetAgro Sup, Laboratoire d'Ecologie Microbienne, Villeurbanne, 69622, France*

*11 Department of Natural Resource Sciences, McGill University, Montreal, Quebec H9X 3V9, Canada*

*12 Center for Sustainable Soil Sciences (C3S), Mohammed VI Polytechnic University, Ben Guerir, Morocco*

*13 Zhejiang Key Laboratory of Urban Environmental Processes and Pollution Control, Ningbo Urban Environment Observation and Research Station, Chinese Academy of Sciences, Ningbo 315830, China*

Number of pages: 45

This file includes:

Supplementary Text 1 to 4

Supplementary Table 1 to 3

Supplementary Fig. 1 to 14

Text S1. Primary studies included in the meta-analysis.

**Supplementary Text 1 Determination of soil physicochemical properties**

**Soil pH** was determined from soil-water suspensions (soil: water=1: 2.5 (w/v)). **Soil organic carbon (SOC)**, **total nitrogen (TN)**, and **C/N ratio** were quantified using an elemental analyzer (Elementar, Vario MAX CN, Co., Ltd, Germany) using soil pretreated with hydrogen chloride. **Dissolved organic carbon (DOC)** and **microbial biomass carbon (MBC)** were determined using the K2SO4 extraction and chloroform fumigation-extraction method1. To determine DOC, 5 g soil was combined with 25 mL of 0.5M K2SO4 and placed on a shaker for 1 hour, followed by filtration. A second set of soils were placed in a desiccator with 20 mL chloroform under a vacuum and fumigated for 48 hours before extraction. Filtrate C contents were determined on a Total Organic Carbon analyzer (Multi‐N/C 2100S; Analytik Jena, Jena, Germany). The MBC was calculated as the difference between fumigated and unfumigated samples divided by the extraction efficiency (kEC = 0.45). **Ammonium (NH4+-N) and nitrate (NO3--N)** were extracted from soil with 1 M KCl (1:7.5 (w/v)) and measured using a continuous flow analyzer (Skalar SAN++ System, Skalar Analytical B.V., Breda, Netherlands). **Available phosphorus (AP)** was measured as Olsen P from air-dried soil samples. **Available potassium (AK)** measurements were performed by inductively coupled plasma-optical emission spectrometry (Optima 8300 ICP-OES, Perkin Elmer, USA). All physicochemical measurements were performed in three replicates per treatment.

**Supplementary Text 2 Analysis of soil microbial community**

**Phospholipid fatty acids (PLFAs)** were extracted from 2 g of freeze-dried soil using a modified Bligh and Dyer method, in triplicate for each treatment2. Soil samples were extracted twice with 22.8 mL one-phase chloroform-methanol-citrate buffer (0.15 M, pH 4.0)3. Lipid fractions were separated into neutral lipids, glycolipids, and phospholipids on a silica gel column (Supelco, USA), with the phospholipid fraction eluted using methanol. Phospholipids were transesterified to fatty acid methyl esters (FAMEs) by mild alkaline methanolysis and subsequently analyzed using gas chromatography (7890B, Agilent, USA) equipped with a flame ionization detector and a capillary column. Individual FAMEs were identified by comparing retention times with known standards (MIDI Inc., USA) and quantified based on internal standards. PLFA biomarkers were assigned to major microbial groups, including Gram-positive and Gram-negative bacteria, fungi, according to established nomenclature4. Specifically, the PLFA classification encompasses bacterial PLFA, including Gram-positive (G+) and Gram-negative (G-) types, where G+ comprises *Firmicutes* (i14:0, i15:0, i16:0, i17:0, i18, a15:0, a16:0, a17:0, a18:0, a19:0) and *Actinobacteria* (10Me16:0, 10Me17:0, 10Me18:0), while G- includes cy17:0, cy19:0, 16:1ω7, 16:1ω9, 17:1ω8, and 18:1ω7; fungal PLFA covers AMF (16:1ω5c), *Zygomycota* (18:1ω9c), *Ascomycota* and *Basidiomycota* (18:2ω6c), and unspecific fungal PLFA (18:3ω6,9,12); and unspecific microbial PLFA includes 14:0, 15:0, 16:0, 17:0, 18:0, 20:0, 20:4ω6,9,12,15.

Soil DNA was extracted from 0.5 g of freeze-dried soil using the DNeasy PowerSoil Kit (QIAGEN, Germany) following the manufacturer’s instructions. The DNA quality was assessed with a NanoDrop 2000 spectrophotometer (Thermo Fisher Scientific, USA). The **16S rRNA gene** (V4-V5 region) was amplified using primers 515F (Illumina adapter sequence 1 + GTGCCAGCMGCCGCGG) and 907R (Illumina adapter sequence 2 + CCGTCAATTCMTTTRAGTTT), while fungal **ITS1** regions were amplified using primers ITS1F (Illumina adapter sequence 1+ CTTGGTCATTTAGAGGAAGTAA) and ITS2 (Illumina adapter sequence 2+ GCTGCGTTCTTCATCGATGC). Sample-specific barcodes were introduced, and amplicons were purified with AMPure XP beads. Libraries were quantified, pooled at equimolar concentrations, and quality-checked using an Agilent 2100 Bioanalyzer (Agilent, USA). Sequencing was performed on the Illumina NovaSeq 6000 platform (PE250) at G&C Biotechnology (Shanghai, China). Paired-end reads were processed using the QIIME2 (version 2024.10) pipeline5. The adaptor and primer sequences were trimmed using the *cutadapt* plugin. Sequencing data were quality-filtered, trimmed, and denoised using DADA2 plugin6. Taxonomic assignment was performed on filtered amplicon sequence variants (ASVs) against pre-trained (the Naïve Bayes classifier) QIIME2-compatible databases (16S: Greengenes version 13.8, ITS: UNITE version 10.0). Feature tables were rarefied to normalize sequencing depth across samples prior to further analysis.

**Metagenomic** libraries were constructed from high-quality genomic DNA using a ligation-based protocol. DNA was randomly sheared to ~200–600 bp fragments using a Covaris system (Covaris, USA), followed by end repair, adapter ligation, and PCR amplification. Size-selected libraries were purified using magnetic beads (Transgen, China), quantified with Library Quantification Kit (KAPA Biosystems), and quality-checked on an Agilent 2100 Bioanalyzer (Agilent, USA). Sequencing was performed on the Illumina NovaSeq X Plus platform (PE150), generating approximately 15 Gb of paired-end reads per sample. Metagenomic reads were assembled *de novo* using MEGAHIT (version 1.2.9) with a multi *k-mer* strategy (--k-list 27,47,67,87,107,127,141). Contigs ≥ 3,000 bp were retained for **viral identification**. Putative viral sequences were detected using VirSorter2 (version 2.2.4), geNomad (version 1.11.1), and viralVerify (version 1.1) in non-concentrated mode (--non-con). CheckV (version 1.5) was used to assess genome completeness and remove host-derived regions. High-quality viral contigs (≥ 50% completeness) were binned into viral metagenome-assembled genomes (vMAGs) using vRhyme (version 1.1.0), and de-replicated with dRep (version 3.4.2; --min-seq-id 0.95 --cov-mode 1 -c 0.9) to generate a non-redundant genome set7,8. High-confidence viral genomes were clustered into viral operational taxonomic units (vOTUs; ≥ 95% ANI and ≥ 85% alignment fraction). Viral abundance was estimated by mapping quality-filtered reads to vOTU representative sequences using Bowtie2 (version 2.5.4) with --end-to-end and --very-sensitive parameters9. Read counts were normalized to transcripts per million (TPM) based on contig length and library size.

Within our targeted sampling dataset, microbial community **α-diversity** was quantified using the observed richness (number of ASVs/vOTUs) and Shannon index following the *mothur* implementation (https://mothur.org/wiki/shannon/), and **β-diversity** was assessed as Bray–Curtis dissimilarity among samples.

**Supplementary Text 3 Determination of soil microbial activities**

**Basal respiration** was determined by incubating 10 g (dry weight equivalent) of pre-incubated soil at 25 °C for 24 h in sealed 120 mL serum bottles. Headspace gas samples were collected and analyzed for CO2 concentration using a gas chromatograph (7890B, Agilent, USA) equipped with a thermal conductivity detector. The **metabolic quotient (*q*CO2)** was calculated as the ratio of basal respiration to MBC (mg CO2-C mg-1 MBC d-1).

All enzyme activities were analyzed using assay kits (Boxbio Science & Technology Co., Ltd, China) following the manufacturer’s protocols, and measurements were performed using a microplate method (SpectraMax iD3, Molecular Devices, USA). Activities of soil **β-D-glucosidase (βG)**, **β-xylosidase (βX)**, **cellobiohydrolase (CBH)**, **N-acetylglucosaminidase (NAG)**, were measured using their respective p-nitrophenyl-linked substrates, and the amount of p-nitrophenol (p-NP) released was determined colorimetrically at 400  nm10. **Phosphatase (PHO)** activities were determined depending on soil pH. Both acid and alkaline phosphatases were assayed based on the amount of phenol released from the hydrolysis of disodium phenyl phosphate, measured colorimetrically at 660 nm11. **Leucine aminopeptidase (LAP)** activity was determined using L-leucine-p-nitroanilide as substrate, with p-nitroaniline quantified at 405 nm12. **Urease activity (URE)** was measured based on the formation of a blue complex from the reaction between released NH4+ and a phenol chromogenic agent in alkaline conditions, with absorbance read at 578 nm13. **Phenoloxidase (PO)** activity was determined using l-3,4-dihydroxyphenylalanine (L-DOPA) as substrate, with dopachrome formation measured at 475 nm14. **Invertase (INV)** activity was quantified based on reducing sugar production from sucrose, using the 3,5-dinitrosalicylic acid (DNS) method at 540 nm15. **Dehydrogenase (DHA)** activity was measured via the reduction of triphenyltetrazolium chloride (TTC) to triphenyl-formazan (TPF), detected at 460 nm16.

**Supplementary Text 4 Interpretation of β-dispersion and centroid shift**

Both β-dispersion and centroid shift were calculated from unconstrained ordination (*e.g.*, principal coordinates analysis, PCoA) based on dissimilarity matrices derived from microbial abundance data. **β-dispersion** quantifies within-group variability by computing the average pairwise Euclidean distance among replicate samples within a group in the ordination space, serving as a measure of community heterogeneity17. Here we used pairwise distances rather than distances to the group centroid to improve robustness under small sample sizes and reduce sensitivity to outliers. In contrast, **centroid shift** measures the Euclidean distance between the centroids of different groups (*e.g.*, treatment vs. control), reflecting a directional shift in average community composition18. Together, these two metrics differentiate between compositional divergence (centroid shift) and variability in community responses (β-dispersion) under long-term mineral N fertilization. To aid interpretation, conceptual illustrations and corresponding formulas are provided in Supplementary Figs. 9 and 10. The conceptual basis for distinguishing these two components of β-diversity is also detailed by Houseman et al17.

As centroid shift is inherently non‑negative, we employed a nonparametric bootstrap approach to derive unbiased estimates of both effect sizes and their sampling variances. For each study observation, group coordinates (control vs. treatment) on the first two PCoA axes were resampled 1,000 times with replacement, and the mean Euclidean distance across bootstrap replicates was taken as the effect size (y*i*), with its standard error (SE) providing the sampling variance (V*i* = SE2). These bootstrapped estimates were then synthesized in a multilevel random‑effects meta‑analysis (Supplementary Fig. 5)

**Supplementary Table 1.** Mean values and standard deviations (in parentheses) of soil physicochemical and microbial parameters measured at 11 long-term experiments (*n* = 3, CK, unfertilized control; minN, long-term mineral fertilization). The corresponding metadata are available in the Source Data.

| **Variable**  (Unit) | ***Sampling Site*** | | | | | | | | | | | | | | | | | | | | | |
| --- | --- | --- | --- | --- | --- | --- | --- | --- | --- | --- | --- | --- | --- | --- | --- | --- | --- | --- | --- | --- | --- | --- |
| *Fengqiu* | | *Yangling* | | *Luancheng* | | *Changshu* | | *Jinhua* | | *Fukang* | | *Quzhou* | | *Chengdu* | | *Yingtan* | | *Qiqihar* | | *Guizhou* | |
| CK | minN | CK | minN | CK | minN | CK | minN | CK | minN | CK | minN | CK | minN | CK | minN | CK | minN | CK | minN | CK | minN |
| **Soil pH**  (1: 2.5 H2O) | 8.25  (0.10) | 7.59  (0.11) | 7.77  (0.03) | 7.45  (0.04) | 7.96  (0.02) | 7.76  (0.03) | 7.48  (0.06) | 7.12  (0.06) | 5.66 (0.04) | 5.88 (0.02) | 9.36 (0.06) | 8.81 (0.06) | 7.62 (0.04) | 7.48 (0.05) | 6.43 (0.07) | 6.11 (0.12) | 5.21 (0.23) | 5.10 (0.22) | 7.94 (0.04) | 8.06 (0.03) | 6.66 (0.13) | 6.20 (0.11) |
| **Soil organic C**  (g kg-1) | 9.3 (2.4) | 10.9 (0.2) | 16.8 (0.1) | 20.2 (0.4) | 14.5 (0.7) | 29.7 (1.4) | 33.4 (0.2) | 39.9 (0.5) | 29.8 (0.3) | 31.20 (0.01) | 7.1 (0.6) | 10.5 (0.2) | 20.1 (0.1) | 24.6 (0.6) | 39.4 (1.5) | 39.8 (1.1) | 19.7 (0.1) | 18.1 (0.2) | 29.9 (1.6) | 30.1 (0.5) | 25.9 (1.5) | 30.4 (5.4) |
| **Total N**  (g kg-1) | 0.63 (0.09) | 0.83 (0.12) | 1.23 (0.19) | 1.50 (0.08) | 0.97 (0.05) | 1.47 (0.05) | 2.13 (0.09) | 2.47 (0.05) | 1.67 (0.05) | 1.87 (0.05) | 0.47 (0.05) | 0.70 (0.01) | 1.33 (0.05) | 1.63 (0.05) | 1.90 (0.08) | 1.97 (0.05) | 1.33 (0.05) | 1.27 (0.09) | 1.40 (0.08) | 1.53 (0.05) | 1.70 (0.08) | 1.80 (0.06) |
| **C/N**  (ratio) | 8.08 (1.41) | 7.77 (0.96) | 7.85 (1.11) | 7.68 (0.55) | 8.99 (0.13) | 11.67 (0.39) | 9.17 (0.63) | 9.33 (0.18) | 10.39 (0.05) | 9.69 (0.15) | 8.21 (0.31) | 8.87 (0.26) | 8.61 (0.15) | 8.77 (0.38) | 12.05 (0.22) | 11.86 (0.04) | 8.59 (0.21) | 8.22 (0.77) | 12.27 (0.43) | 11.40 (0.10) | 14.54 (0.67) | 15.90 (2.50) |
| **Dissolved organic C**  (mg kg-1) | 75.8 (13.8) | 119.5 (13.5) | 198.3 (3.8) | 309.0 (91.4) | 123.2 (5.1) | 162.5 (16.9) | 109.8 (19.6) | 136.8 (18.8) | 139.2 (9.0) | 151.8 (39.7) | 49.3 (35.7) | 93.5 (15.8) | 138.5 (20.1) | 164.5 (8.9) | 243.7 (16.2) | 177.7 (44.4) | 235.8 (49.6) | 186.8 (23.3) | 174.5 (30.1) | 159.0 (11.4) | 58.1 (1.0) | 119.4 (8.2) |
| **Ammonium**  (mg N kg-1) | 1.33 (0.49) | 0.88 (0.19) | 3.50 (0.55) | 3.29 (0.90) | 0.76 (0.17) | 1.35 (0.65) | 1.45 (0.73) | 3.76 (1.37) | 4.23 (1.43) | 1.68 (0.72) | 4.86 (0.20) | 3.73 (0.15) | 0.21 (0.03) | 0.26 (0.11) | 2.73 (0.60) | 1.40 (0.39) | 4.00 (0.29) | 4.94 (2.25) | 1.73 (0.10) | 2.10 (0.72) | 2.51 (0.41) | 2.34 (0.21) |
| **Nitrate**  (mg N kg-1) | 24.88 (2.85) | 40.17 (5.33) | 8.52 (0.54) | 48.80 (0.47) | 26.85 (4.69) | 35.18 (11.71) | 23.04 (9.89) | 22.32 (7.50) | 36.30 (4.87) | 22.91 (1.80) | 8.61 (5.12) | 11.98 (4.42) | 2.68 (0.32) | 35.76 (11.60) | 2.03 (0.76) | 11.65 (10.27) | 6.10 (1.35) | 27.93 (12.88) | 18.50 (4.06) | 33.63 (4.20) | 14.50 (2.31) | 30.13 (4.31) |
| **Available P**  (mg kg-1) | 9.74 (2.51) | 32.66 (5.92) | 87.49 (1.32) | 70.93 (4.02) | 6.73 (1.23) | 37.73 (2.65) | 5.56 (0.20) | 23.40 (7.10) | 5.60 (0.16) | 25.00 (2.14) | 7.07 (0.84) | 26.20 (3.58) | 36.79 (6.83) | 49.13 (7.26) | 64.53 (4.05) | 75.33 (2.44) | 39.79 (5.47) | 327.00 (12.45) | 129.88 (7.64) | 285.83 (12.45) | 6.31 (1.91) | 33.26 (6.00) |
| **Available K**  (mg kg-1) | 84.46 (5.06) | 218.43 (39.02) | 70.48 (9.75) | 149.97 (26.12) | 39.75 (0.53) | 59.26 (8.76) | 133.87 (44.73) | 142.30 (69.78) | 36.74 (7.46) | 77.52 (2.35) | 75.37 (8.25) | 129.17 (15.35) | 269.47 (72.37) | 673.93 (232.8) | 120.08 (21.71) | 114.36 (45.91) | 55.95 (8.59) | 172.90 (12.36) | 84.36 (11.08) | 128.39 (28.33) | 99.00 (8.88) | 178.66 (14.43) |
| **Basal respiration**  (mg C kg-1 d-1) | 4.50 (0.45) | 5.39 (0.92) | 13.73 (1.30) | 16.28 (0.42) | 3.32 (0.19) | 3.67 (0.08) | 9.94 (1.28) | 16.64 (1.94) | 7.74 (0.50) | 8.08 (0.02) | 2.12 (0.01) | 6.72 (0.43) | 21.98 (8.43) | 6.11 (0.23) | 10.02 (0.80) | 8.81 (2.76) | 7.49 (0.83) | 9.23 (1.87) | 8.09 (0.04) | 8.03 (1.59) | 3.82 (0.65) | 4.78 (0.46) |
| ***q*CO2**  (mg CO2–C mg-1 MBC d-1) | 0.07 (0.01) | 0.07 (0.04) | 0.11 (0.02) | 0.12 (0.04) | 0.02 (0.01) | 0.03 (0.01) | 0.05 (0.09) | 0.21 (0.04) | 0.14 (0.04) | 0.09 (0.01) | 0.03 (0.01) | 0.12 (0.02) | 0.38 (0.56) | 0.07 (0.01) | 0.09 (0.01) | 0.19 (0.28) | 0.07 (0.01) | 0.06 (0.09) | 0.14 (0.01) | 0.13 (0.06) | 0.02 (0.07) | 0.03 (0.02) |
| **DHA**  (μg TPF d-1 g-1) | 7.90 (2.88) | 11.28 (3.48) | 10.72 (2.11) | 7.33 (2.11) | 14.66 (2.88) | 20.30 (3.66) | 4.51 (2.88) | 51.89 (18.65) | 19.18 (8.44) | 42.30 (6.33) | 8.46 (1.38) | 24.25 (12.38) | 60.35 (3.48) | 194.02 (2.88) | 35.53 (13.61) | 71.06 (15.20) | 7.33 (2.88) | 15.23 (6.33) | 12.41 (0.80) | 60.35 (6.23) | 24.46 (2.49) | 161.59 (149.94) |
| **BG**  (μmol p-NP g-1 d-1) | 18.10 (10.08) | 36.88 (9.26) | 88.66 (24.92) | 118.10 (7.59) | 57.66 (6.00) | 83.99 (9.27) | 17.32 (5.75) | 78.32 (61.02) | 20.66 (15.16) | 34.10 (20.39) | 5.32 (5.06) | 35.77 (18.37) | 65.43 (10.50) | 76.66 (41.36) | 28.54 (11.50) | 13.99 (7.38) | 15.27 (1.83) | 48.77 (19.34) | 24.10 (12.98) | 61.32 (7.01) | 15.68 (2.26) | 22.95 (3.69) |
| **BX**  (μmol p-NP g-1 d-1) | 3.75 (0.49) | 4.44 (0.41) | 14.32 (0.05) | 13.81 (2.41) | 9.14 (0.58) | 11.23 (0.93) | 5.97 (0.81) | 10.37 (4.93) | 5.06 (0.84) | 5.82 (1.08) | 2.22 (0.30) | 4.99 (0.33) | 14.23 (3.12) | 21.17 (6.16) | 12.87 (1.52) | 11.05 (2.56) | 11.52 (6.91) | 6.41 (0.30) | 9.21 (1.28) | 10.74 (0.46) | 11.52 (2.59) | 13.76 (1.28) |
| **CBH**  (μmol p-NP g-1 h-1) | 2.78 (1.56) | 1.49 (0.44) | 5.70 (0.53) | 6.31 (0.79) | 3.86 (0.62) | 4.56 (0.01) | 2.02 (0.01) | 7.89 (1.84) | 7.98 (1.67) | 10.30 (2.41) | 0.96 (0.01) | 8.16 (1.49) | 7.98 (3.31) | 7.78 (4.48) | 8.83 (0.60) | 6.11 (1.15) | 3.98 (1.96) | 7.57 (3.83) | 2.98 (1.23) | 4.62 (0.25) | 5.69 (0.38) | 3.91 (0.99) |

**Abbreviations**: ***q*CO2**, microbial metabolic quotient; **DHA**, dehydrogenase; **BG**, β-D-glucosidase; **BX**, β-xylosidase; **CBH**, cellobiohydrolase; **TPF**, triphenyl-formazan; **p-NP**, p-nitrophenol.

*Continued.*

**Supplementary Table 1.** Continued.

| **Variable**  (Unit) | ***Sampling Site*** | | | | | | | | | | | | | | | | | | | | | |
| --- | --- | --- | --- | --- | --- | --- | --- | --- | --- | --- | --- | --- | --- | --- | --- | --- | --- | --- | --- | --- | --- | --- |
| *Fengqiu* | | *Yangling* | | *Luancheng* | | *Changshu* | | *Jinhua* | | *Fukang* | | *Quzhou* | | *Chengdu* | | *Yingtan* | | *Qiqihar* | | *Guizhou* | |
| CK | minN | CK | minN | CK | minN | CK | minN | CK | minN | CK | minN | CK | minN | CK | minN | CK | minN | CK | minN | CK | minN |
| **Invertase**  (mg Glc d-1 g-1) | 5.52 (2.90) | 2.67 (0.47) | 11.06 (4.10) | 21.43 (13.96) | 4.21 (1.04) | 7.60 (1.31) | 3.04 (0.59) | 3.91 (0.96) | 2.67 (0.30) | 3.16 (0.09) | 3.04 (0.42) | 3.13 (0.15) | 6.18 (1.19) | 11.16 (3.32) | 3.48 (0.33) | 3.09 (0.07) | 3.30 (0.12) | 3.70 (0.33) | 5.55 (1.23) | 7.33 (2.30) | 17.44 (5.18) | 18.83 (1.31) |
| **NAG**  (nmol g-1 h-1) | 56.83 (19.58) | 124.76 (27.93) | 246.48 (17.74) | 474.07 (53.27) | 280.97 (207.99) | 221.66 (62.26) | 134.76 (55.78) | 259.59 (179.21) | 180.28 (104.30) | 144.41 (12.41) | 18.21 (0.01) | 63.72 (8.94) | 240.28 (43.54) | 262.34 (72.52) | 530.62 (161.01) | 424.76 (235.86) | 110.62 (50.83) | 195.45 (63.49) | 109.93 (15.70) | 167.17 (42.64) | 356.60 (60.76) | 269.90 (44.60) |
| **LAP**  (nmol g-1 h-1) | 244.53 (62.67) | 328.97 (60.69) | 413.41 (150.26) | 603.9 (180.44) | 412.06 (45.32) | 250.61 (91.71) | 272.90 (86.93) | 337.75 (134.44) | 248.58 (150.47) | 465.42 (97.85) | 193.87 (19.18) | 320.86 (71.29) | 311.41 (83.72) | 811.28 (184.15) | 443.80 (227.49) | 153.34 (11.02) | 203.33 (55.01) | 238.45 (48.45) | 253.31 (45.52) | 395.17 (81.93) | 611.73 (224.42) | 580.00 (106.85) |
| **Urease**  (μg d-1 g-1) | 101.41 (42.10) | 795.55 (19.07) | 643.75 (95.91) | 573.92 (28.17) | 634.00 (36.94) | 805.58 (2.27) | 242.08 (78.30) | 632.25 (190.74) | 136.10 (20.22) | 159.46 (6.16) | 109.69 (42.60) | 168.66 (43.91) | 805.86 (75.12) | 835.85 (18.10) | 397.01 (23.26) | 326.35 (57.45) | 146.49 (13.30) | 110.70 (45.16) | 208.13 (24.04) | 238.95 (35.68) | 216.40 (19.41) | 212.30 (38.10) |
| **PHO**  (μmol p-NP g-1 d-1) | 4.89 (0.74) | 8.09 (0.44) | 10.82 (0.70) | 17.99 (1.07) | 12.97 (0.88) | 15.37 (1.33) | 9.57 (0.90) | 14.40 (3.15) | 26.02 (1.61) | 26.37 (0.52) | 2.88 (0.38) | 4.47 (0.23) | 12.68 (0.89) | 17.17 (1.96) | 23.63 (1.91) | 23.79 (1.11) | 24.62 (1.86) | 25.45 (1.38) | 14.34 (0.91) | 14.68 (0.45) | 13.37 (1.48) | 13.70 (0.55) |
| **POX**  (μmol h-1 g-1) | 0.73 (0.08) | 0.70 (0.06) | 0.90 (0.03) | 0.76 (0.07) | 0.55 (0.01) | 0.61 (0.04) | 0.39 (0.07) | 0.68 (0.12) | 0.64 (0.06) | 0.76 (0.04) | 0.49 (0.04) | 0.63 (0.01) | 0.62 (0.01) | 0.65 (0.02) | 0.99 (0.07) | 0.99 (0.04) | 0.85 (0.06) | 0.96 (0.03) | 0.79 (0.02) | 0.84 (0.01) | 0.29 (0.03) | 0.26 (0.03) |
| **MBC**  (mg kg-1) | 65.5 (33.4) | 71.9 (20.5) | 120.2 (59.3) | 134.5 (11.5) | 156.1 (91.2) | 108.7 (49.5) | 185.6 (14.6) | 81.1 (44.8) | 56.7 (14.0) | 93.6 (12.7) | 74.4 (36.9) | 56.8 (24.1) | 57.9 (15.0) | 89.4 (29.9) | 106.8 (63.4) | 46.0 (10.0) | 101.2 (71.2) | 142.4 (20.0) | 58.0 (25.3) | 61.5 (28.6) | 190.1 (9.8) | 151.4 (23.7) |
| **Bacterial PLFAs**  (nmol g-1) | 9.91 (1.03) | 16.38 (2.51) | 27.16 (0.18) | 24.23 (2.33) | 14.78 (2.01) | 18.02 (1.34) | 26.87 (2.71) | 23.69 (1.15) | 28.86 (1.68) | 61.44 (3.53) | 9.64 (0.14) | 17.15 (0.08) | 37.97 (2.24) | 40.52 (6.55) | 60.04 (4.18) | 50.97 (3.26) | 35.18 (4.47) | 29.64 (1.10) | 17.44 (1.44) | 17.63 (1.62) | 33.86 (4.71) | 34.30 (3.65) |
| **G+**  (nmol g-1) | 4.96 (0.47) | 7.49 (1.96) | 14.47 (0.29) | 12.09 (1.78) | 7.75 (1.52) | 9.10 (1.30) | 14.81 (1.36) | 13.63 (0.42) | 17.56 (0.57) | 36.84 (2.28) | 4.21 (0.14) | 6.43 (0.10) | 19.67 (1.31) | 18.98 (4.33) | 29.42 (2.70) | 24.90 (2.49) | 20.25 (2.83) | 17.41 (0.67) | 9.33 (1.39) | 8.22 (1.18) | 18.91 (4.30) | 18.71 (3.29) |
| **G-**  (nmol g-1) | 4.95 (0.56) | 8.89 (1.28) | 12.48 (0.10) | 12.14 (0.76) | 7.03 (0.48) | 8.92 (0.03) | 12.05 (1.36) | 10.05 (0.73) | 11.30 (1.11) | 24.59 (1.27) | 5.44 (0.01) | 10.71 (0.18) | 18.29 (0.93) | 21.53 (2.23) | 30.62 (1.50) | 26.07 (0.78) | 14.92 (1.64) | 12.22 (0.42) | 8.11 (0.28) | 9.40 (0.96) | 14.95 (1.43) | 15.58 (0.47) |
| **Fungal PLFAs**  (nmol g-1) | 2.84 (0.45) | 4.23 (1.20) | 7.21 (0.01) | 6.16 (0.31) | 3.00 (0.18) | 3.45 (0.08) | 4.13 (0.36) | 3.11 (0.27) | 6.42 (0.55) | 14.46 (0.69) | 2.76 (0.05) | 5.51 (0.35) | 8.11 (0.68) | 10.76 (1.37) | 15.44 (2.65) | 11.49 (0.06) | 8.08 (0.92) | 6.23 (0.12) | 4.14 (0.26) | 4.32 (0.40) | 7.57 (1.07) | 8.89 (0.52) |
| **Bacterial richness** | 2694 (49) | 2596 (88) | 2704 (29) | 2233 (49) | 2599 (72) | 2586 (51) | 2703 (192) | 2819 (44) | 2294 (103) | 2542 (129) | 2222 (49) | 2436 (141) | 2156 (64) | 2204 (188) | 3239 (88) | 3087 (120) | 2562 (70) | 2501 (135) | 2630 (171) | 2638 (73) | 1941 (87) | 1949 (44) |
| **Bacterial Shannon** | 7.19 (0.05) | 7.15 (0.01) | 7.28 (0.01) | 6.94 (0.03) | 7.13 (0.15) | 7.17 (0.09) | 7.34 (0.05) | 7.38 (0.02) | 7.04 (0.08) | 7.18 (0.08) | 6.92 (0.06) | 7.09 (0.08) | 6.72 (0.06) | 6.81 (0.19) | 7.57 (0.03) | 7.43 (0.06) | 6.99 (0.08) | 7.02 (0.07) | 7.26 (0.04) | 7.22 (0.05) | 6.69 (0.10) | 6.73 (0.03) |
| **Bacterial β-dispersion** | 0.04 (0.02) | 0.24 (0.16) | 0.16 (0.12) | 0.04 (0.02) | 0.21 (0.26) | 0.03 (0.02) | 0.10 (0.05) | 0.17 (0.14) | 0.07 (0.03) | 0.20 (0.17) | 0.28 (0.20) | 0.06 (0.04) | 0.13 (0.07) | 0.20 (0.12) | 0.04 (0.02) | 0.22 (0.16) | 0.20 (0.14) | 0.06 (0.03) | 0.15 (0.15) | 0.18 (0.11) | 0.20 (0.15) | 0.04 (0.02) |
| **Fungal richness** | 344 (40) | 445 (39) | 319 (48) | 539 (18) | 322 (31) | 462 (18) | 256 (40) | 351 (42) | 255 (53) | 241 (25) | 301 (32) | 437 (32) | 370 (19) | 358 (12) | 847 (75) | 795 (42) | 735 (110) | 747 (32) | 550 (15) | 569 (17) | 449 (62) | 441 (21) |
| **Fungal Shannon** | 4.35 (0.14) | 4.69 (0.18) | 4.53 (0.12) | 4.87 (0.06) | 4.10 (0.65) | 4.72 (0.14) | 4.29 (0.15) | 4.57 (0.49) | 4.40 (0.36) | 3.97 (0.45) | 4.12 (0.17) | 4.33 (0.39) | 3.87 (0.31) | 3.97 (0.17) | 5.07 (0.29) | 5.17 (0.09) | 4.90 (0.34) | 5.30 (0.19) | 5.02 (0.12) | 4.83 (0.07) | 4.38 (0.36) | 4.40 (0.10) |
| **Fungal β-dispersion** | 0.12 (0.08) | 0.25 (0.14) | 0.24 (0.18) | 0.04 (0.02) | 0.30 (0.28) | 0.09 (0.03) | 0.08 (0.05) | 0.27 (0.25) | 0.30 (0.16) | 0.30 (0.16) | 0.25 (0.19) | 0.21 (0.18) | 0.13 (0.08) | 0.25 (0.13) | 0.26 (0.15) | 0.05 (0.03) | 0.21 (0.16) | 0.18 (0.15) | 0.22 (0.12) | 0.11 (0.05) | 0.28 (0.25) | 0.14 (0.10) |

**Abbreviations**: **NAG**, N-acetylglucosaminidase; **LAP**, leucine aminopeptidase; **PHO**, phosphatase; **POX**, phenoloxidases; **MBC**, microbial biomass C; **Glc**, glucose; **p-NP**, p-nitrophenol.

*Continued.*

**Supplementary Table 1.** Continued.

| **Variable**  (Unit) | **Sampling Site** | | | | | | | | | | | | | | | | | | | | |  |
| --- | --- | --- | --- | --- | --- | --- | --- | --- | --- | --- | --- | --- | --- | --- | --- | --- | --- | --- | --- | --- | --- | --- |
| *Fengqiu* | | *Yangling* | | *Luancheng* | | *Changshu* | | *Jinhua* | | *Fukang* | | *Quzhou* | | *Chengdu* | | *Yingtan* | | *Qiqihar* | | *Guizhou* | |
| CK | minN | CK | minN | CK | minN | CK | minN | CK | minN | CK | minN | CK | minN | CK | minN | CK | minN | CK | minN | CK | minN |
| **Viral richness** | 1031 (48) | 1576 (57) | 1393 (28) | 1084 (106) | 1166 (76) | 1474 (100) | 516 (36) | 433 (43) | 408 (34) | 414 (31) | 604 (51) | 667 (56) | 2433 (55) | 2542 (54) | 447 (64) | 457 (119) | 481 (14) | 515 (11) | 600 (42) | 736 (28) | 745 (68) | 885 (30) |
| **Viral Shannon** | 4.94 (0.18) | 4.99 (0.33) | 5.31 (0.13) | 3.91 (0.40) | 4.65 (0.94) | 5.10 (0.65) | 3.99 (0.37) | 3.72 (0.23) | 4.59 (0.19) | 4.62 (0.21) | 4.58 (0.31) | 4.55 (0.27) | 6.65 (0.15) | 6.78 (0.30) | 3.63 (0.38) | 3.77 (0.25) | 5.00 (0.14) | 5.47 (0.06) | 3.96 (0.40) | 4.22 (0.37) | 5.40 (0.21) | 5.45 (0.17) |
| **Viral β-dispersion** | 0.07 (0.04) | 0.32 (0.19) | 0.01 (0.01) | 0.17 (0.18) | 0.29 (0.37) | 0.05 (0.03) | 0.17 (0.10) | 0.17 (0.10) | 0.16 (0.09) | 0.18 (0.16) | 0.46 (0.32) | 0.10 (0.08) | 0.06 (0.04) | 0.27 (0.14) | 0.23 (0.15) | 0.17 (0.10) | 0.15 (0.14) | 0.09 (0.06) | 0.29 (0.18) | 0.15 (0.08) | 0.19 (0.17) | 0.10 (0.08) |
| ***Proteobacteria***  (%) | 14.41 (0.52) | 20.19 (1.98) | 14.66 (0.67) | 17.58 (0.75) | 18.50 (1.10) | 23.20 (1.94) | 19.12 (1.20) | 16.99 (0.76) | 14.46 (1.36) | 15.18 (1.88) | 18.71 (1.51) | 23.30 (1.61) | 19.96 (0.94) | 25.15 (3.77) | 17.97 (0.72) | 14.96 (1.10) | 13.79 (1.64) | 13.26 (1.19) | 16.43 (0.75) | 19.03 (1.39) | ND | ND |
| ***Acidobacteria***  (%) | 22.66 (1.34) | 18.83 (1.02) | 23.21 (0.69) | 15.59 (1.11) | 22.45 (3.87) | 21.67 (0.43) | 16.73 (1.03) | 16.68 (1.11) | 21.68 (1.12) | 20.84 (0.47) | 15.57 (2.37) | 15.92 (1.82) | 7.75 (1.08) | 10.34 (2.34) | 14.94 (0.50) | 11.85 (1.23) | 16.03 (1.38) | 17.56 (0.56) | 23.06 (0.44) | 19.09 (0.32) | 26.79 (2.36) | 25.86 (0.44) |
| ***Actinobacteria***  (%) | 3.66 (0.42) | 3.98 (0.28) | 10.09 (0.17) | 15.78 (0.94) | 5.14 (0.67) | 6.41 (0.78) | 2.99 (0.71) | 2.52 (0.19) | 1.03 (0.28) | 1.08 (0.42) | 3.79 (0.25) | 4.47 (0.24) | 2.06 (0.75) | 4.66 (0.44) | 1.33 (0.22) | 0.94 (0.29) | 0.73 (0.24) | 0.54 (0.10) | 11.49 (0.39) | 11.31 (0.47) | ND | ND |
| ***Bacteroidetes***  (%) | 12.04 (3.04) | 15.89 (1.51) | 7.33 (0.59) | 19.02 (1.07) | 12.43 (1.35) | 10.26 (1.43) | 10.67 (1.26) | 13.19 (1.89) | 4.86 (0.42) | 7.83 (0.45) | 16.71 (2.70) | 19.94 (4.04) | 43.06 (3.49) | 32.37 (3.39) | 11.23 (0.47) | 16.39 (1.65) | 10.18 (0.82) | 7.66 (0.34) | 9.16 (0.41) | 17.70 (3.97) | 8.88 (2.94) | 10.28 (0.56) |
| ***Firmicutes***  (%) | 2.49 (0.49) | 2.09 (0.61) | 2.23 (0.24) | 1.56 (0.21) | 1.05 (0.21) | 0.59 (0.22) | 1.87 (0.51) | 3.48 (0.47) | 0.48 (0.04) | 1.02 (0.15) | 0.97 (0.11) | 0.33 (0.03) | 2.27 (0.19) | 1.58 (0.26) | 6.65 (1.40) | 9.81 (1.28) | 1.08 (0.14) | 0.62 (0.15) | 0.45 (0.05) | 0.68 (0.23) | ND | ND |
| ***Verrucomicrobia***  (%) | 1.02 (0.05) | 1.30 (0.06) | 0.97 (0.10) | 1.62 (0.17) | 0.78 (0.10) | 0.62 (0.05) | 0.74 (0.14) | 0.84 (0.19) | 0.73 (0.08) | 1.23 (0.11) | 2.35 (0.26) | 1.33 (0.23) | 1.49 (0.11) | 1.24 (0.12) | 0.63 (0.10) | 0.72 (0.18) | 1.84 (0.27) | 1.45 (0.28) | 1.05 (0.1) | 1.56 (0.13) | ND | ND |
| ***Planctomycetes***  (%) | 9.98 (1.40) | 9.54 (0.56) | 12.06 (0.23) | 8.08 (0.86) | 9.88 (1.95) | 9.42 (0.37) | 6.03 (0.32) | 3.78 (0.39) | 3.78 (0.20) | 4.22 (0.48) | 7.41 (0.97) | 7.65 (1.64) | 3.26 (0.98) | 4.49 (1.37) | 3.71 (0.29) | 2.28 (0.52) | 2.56 (0.72) | 3.93 (0.31) | 9.45 (0.52) | 6.23 (2.06) | ND | ND |
| ***Chloroflexi***  (%) | 12.53 (1.29) | 10.18 (1.22) | 10.40 (0.42) | 10.41 (0.37) | 7.05 (0.39) | 7.72 (0.62) | 15.70 (1.32) | 19.19 (0.43) | 15.72 (1.26) | 16.23 (0.93) | 14.38 (2.14) | 11.26 (1.27) | 8.88 (0.68) | 7.73 (1.11) | 15.50 (0.83) | 13.45 (1.66) | 12.84 (0.84) | 15.63 (1.25) | 9.20 (0.40) | 8.74 (0.37) | 14.17 (1.22) | 15.02 (0.45) |
| ***Nitrospirae***  (%) | 2.41 (0.21) | 2.15 (0.25) | 1.67 (0.08) | 0.67 (0.08) | 1.76 (0.31) | 1.88 (0.21) | 3.31 (0.42) | 4.67 (0.21) | 11.02 (1.24) | 8.40 (1.99) | 1.04 (0.40) | 0.68 (0.06) | 0.66 (0.26) | 0.98 (0.26) | 5.04 (0.76) | 7.18 (1.44) | 15.27 (3.10) | 14.10 (1.06) | 2.08 (0.31) | 2.41 (0.18) | 1.18 (0.21) | 1.74 (0.17) |
| ***Ascomycota***  (%) | 26.02 (3.73) | 41.35 (8.53) | 46.78 (4.90) | 64.74 (2.70) | 48.27 (15.63) | 44.69 (6.29) | 40.28 (8.23) | 37.77 (7.95) | 24.65 (7.40) | 48.28 (17.39) | 40.19 (7.81) | 46.54 (15.65) | 38.60 (12.24) | 58.18 (12.13) | 34.85 (6.67) | 39.90 (3.56) | 26.51 (10.35) | 28.86 (4.97) | 48.90 (4.77) | 59.29 (5.26) | 66.86 (8.79) | 58.31 (6.76) |
| ***Basidiomycota***  (%) | 18.68 (4.66) | 11.56 (5.06) | 3.44 (1.00) | 4.77 (0.58) | 4.38 (2.03) | 7.81 (2.29) | 21.18 (7.00) | 16.77 (19.60) | 11.10 (3.90) | 5.31 (2.48) | 15.47 (3.03) | 4.41 (2.47) | 1.59 (0.55) | 1.15 (0.58) | 3.22 (1.12) | 3.90 (0.56) | 1.27 (0.47) | 2.50 (0.79) | 11.22 (1.44) | 8.91 (5.75) | 12.52 (4.30) | 5.75 (2.09) |
| ***Rozellomycota***  (%) | 0.79 (0.70) | 0.55 (0.22) | 1.46 (0.63) | 0.19 (0.06) | 1.35 (0.53) | 0.96 (0.79) | 5.05 (1.87) | 10.6 (3.52) | 1.27 (0.61) | 2.08 (1.50) | 0.01 (0.01) | 0.41 (0.27) | 0.63 (0.29) | 0.44 (0.29) | 18.95 (3.08) | 19.63 (3.62) | 26.94 (9.41) | 16.59 (1.78) | 0.43 (0.30) | 0.48 (0.13) | 0.58 (0.40) | 0.64 (0.25) |
| ***Glomeromycota***  (%) | 0.19 (0.10) | 0.10 (0.10) | 0.01 (0.01) | 0.04 (0.03) | 0.16 (0.12) | 0.01 (0.01) | 1.76 (0.38) | 0.11 (0.14) | 2.27 (0.63) | 0.84 (0.58) | 0.08 (0.11) | 0.31 (0.36) | 0.01 (0.01) | 0.01 (0.01) | 0.86 (0.39) | 1.36 (0.32) | 0.75 (0.54) | 1.33 (0.83) | 0.40 (0.05) | 0.59 (0.14) | 0.60 (0.48) | 0.99 (0.21) |
| ***Chytridiomycota***  (%) | 7.2 (4.3) | 9.02 (6.73) | 7.94 (3.88) | 8.79 (2.22) | 8.31 (5.19) | 8.57 (1.84) | 3.77 (0.70) | 7.96 (4.62) | 13.32 (6.68) | 4.36 (1.09) | 19.51 (9.57) | 20.13 (8.39) | 28.16 (11.60) | 18.54 (8.78) | 5.41 (2.29) | 6.75 (1.11) | 17.47 (9.55) | 8.73 (1.97) | 9.51 (3.19) | 9.48 (3.97) | 1.62 (0.98) | 3.38 (2.00) |
| ***Mortierellomycota***  (%) | 14.43 (5.45) | 13.39 (3.58) | 26.67 (5.57) | 10.03 (1.48) | 25.52 (14.86) | 25.85 (5.12) | 0.96 (0.76) | 5.12 (2.85) | 13.67 (12.30) | 10.80 (7.37) | 4.88 (2.64) | 4.79 (1.86) | 20.05 (6.16) | 14.42 (2.88) | 9.40 (1.47) | 10.68 (3.86) | 1.15 (0.49) | 3.57 (2.28) | 15.30 (2.87) | 11.68 (1.74) | 13.92 (4.54) | 23.51 (5.60) |
| ***Mucoromycota***  (%) | 0.03 (0.02) | 0.06 (0.03) | 0.03 (0.03) | ND | ND | ND | 0.13 (0.18) | 0.26 (0.37) | 1.52 (1.97) | 0.10 (0.13) | 0.03 (0.04) | ND | 0.04 (0.01) | 0.02 (0.01) | 0.04 (0.04) | 0.02 (0.02) | 0.19 (0.04) | 2.94 (1.47) | ND | ND | 0.13 (0.14) | 0.05 (0.02) |
| ***Uroviricota***  (%) | 99.22 (0.51) | 98.52 (2.58) | 99.10 (1.39) | 100.00 (0.01) | 99.69 (0.62) | 99.94 (0.06) | 99.98 (0.03) | 100.00 (0.01) | 100.00 (0.01) | 99.34 (1.26) | 100.00 (0.01) | 100.00 (0.01) | 99.97 (0.02) | 99.95 (0.08) | 100.00 (0.01) | 96.61 (3.26) | 99.48 (0.63) | 99.79 (0.19) | 100.00 (0.01) | 100.00 (0.01) | 99.40 (0.73) | 99.90 (0.19) |
| ***Fungal symbiots***  (%) | 0.19 (0.10) | 0.10 (0.10) | 0.01 (0.01) | 0.40 (0.14) | 0.18 (0.13) | 0.11 (0.06) | 1.78 (0.41) | 0.11 (0.15) | 2.59 (0.89) | 0.89 (0.58) | 0.08 (0.11) | 0.30 (0.36) | 0.03 (0.06) | 0.02 (0.03) | 1.31 (0.37) | 1.71 (0.49) | 0.80 (0.51) | 1.44 (0.80) | 1.61 (0.45) | 2.81 (0.49) | 0.74 (0.51) | 1.08 (0.22) |
| ***Fungal saprotrophs***  (%) | 10.81 (5.13) | 17.13 (4.99) | 10.35 (1.81) | 19.37 (1.81) | 9.00 (2.09) | 9.94 (4.02) | 14.39 (3.49) | 9.97 (2.74) | 8.82 (3.14) | 11.42 (4.44) | 11.96 (7.39) | 13.31 (12.25) | 14.37 (11.03) | 26.05 (8.00) | 12.04 (4.31) | 16.68 (4.75) | 6.19 (2.91) | 8.77 (1.32) | 11.86 (4.79) | 17.42 (6.11) | 8.31 (1.71) | 7.56 (2.18) |
| ***Fungal pathotrophs***  (%) | 0.15 (0.21) | 0.70 (0.34) | 0.45 (0.48) | 1.75 (0.45) | 0.72 (0.46) | 1.07 (0.45) | 1.91 (0.87) | 2.61 (0.77) | 0.38 (0.75) | 0.09 (0.06) | 0.00 (0.01) | 0.03 (0.04) | 0.23 (0.35) | 0.10 (0.05) | 0.58 (0.20) | 0.61 (0.26) | 0.13 (0.11) | 0.36 (0.36) | 0.13 (0.08) | 0.14 (0.11) | 8.10 (6.48) | 1.96 (0.30) |
| ***Temperate phage***  (%) | 23.71 (4.45) | 31.29 (5.02) | 25.12 (3.92) | 17.56 (2.23) | 27.91 (15.84) | 20.07 (4.28) | 28.51 (10.62) | 20.94 (11.41) | 24.92 (4.52) | 31.01 (7.58) | 38.58 (11.97) | 45.10 (5.72) | 32.07 (1.32) | 33.19 (1.67) | 44.25 (9.01) | 35.24 (7.80) | 38.70 (3.99) | 19.76 (2.00) | 41.71 (7.19) | 29.11 (9.37) | 27.18 (4.07) | 28.65 (2.21) |
| ***Virulent phage***  (%) | 58.58 (3.06) | 61.26 (5.84) | 67.54 (3.86) | 77.44 (2.10) | 62.15 (13.20) | 73.14 (6.06) | 67.59 (10.84) | 76.01 (11.83) | 59.07 (5.67) | 51.01 (7.99) | 50.04 (11.25) | 47.07 (5.93) | 52.17 (1.07) | 58.06 (1.88) | 43.68 (12.93) | 47.63 (7.73) | 47.23 (3.11) | 61.65 (2.88) | 53.37 (5.56) | 68.07 (9.00) | 50.51 (5.60) | 53.69 (2.46) |

**Supplementary Table 2.** PRISMA (Preferred Reporting Items for Systematic Reviews and Meta-Analyses) flow diagram for the current meta-analysis.

Records identified from:

Web of Science (*n* = **1697**)

**Identification**

Records excluded after screening by two authors

(*n* = **1338**)

**Screening**

Records screened

(*n* = **359**)

Full-text articles excluded with reasons

(*n* = **134**)

1. Without unfertilized control (*n* = 44)
2. Duration less than 5 years (*n* = 17)
3. Insufficient methodological information (*n* = 12)
4. Non-cropland systems (*n* = 20)
5. Limited to specific microbial groups (*n* = 5)
6. Duplicate data (*n* = 10)
7. Unrepresentative sampling (*n* = 11)
8. Confounded treatments (*n* = 9)
9. Other reasons (*n* = 6)
10. Repeated records (n = **2**)

Full-text articles assessed for eligibility

(*n* = **225**)

**Eligibility**

**Included**

Primary studies included in the meta-analysis

(*n* = **225**)

**Supplementary Table 3.** PRISMA 2020 Checklist.

| **Section and Topic** | **Item** | **Checklist item** | **Location where item is reported** |
| --- | --- | --- | --- |
| **TITLE** | | |  |
| Title | 1 | Identify the report as a systematic review. | *Abstract* |
| **ABSTRACT** | | |  |
| Abstract | 2 | See the PRISMA 2020 for Abstracts checklist. | *Abstract* |
| **INTRODUCTION** | | |  |
| Rationale | 3 | Describe the rationale for the review in the context of existing knowledge. | *Main* |
| Objectives | 4 | Provide an explicit statement of the objective(s) or question(s) the review addresses. | *Main* |
| **METHODS** | | |  |
| Eligibility criteria | 5 | Specify the inclusion and exclusion criteria for the review and how studies were grouped for the syntheses. | *Methods* |
| Information sources | 6 | Specify all databases, registers, websites, organisations, reference lists and other sources searched or consulted to identify studies. Specify the date when each source was last searched or consulted. | *Methods* |
| Search strategy | 7 | Present the full search strategies for all databases, registers and websites, including any filters and limits used. | *Methods* |
| Selection process | 8 | Specify the methods used to decide whether a study met the inclusion criteria of the review, including how many reviewers screened each record and each report retrieved, whether they worked independently, and if applicable, details of automation tools used in the process. | *Supplementary Table 2* |
| Data collection process | 9 | Specify the methods used to collect data from reports, including how many reviewers collected data from each report, whether they worked independently, any processes for obtaining or confirming data from study investigators, and if applicable, details of automation tools used in the process. | *Methods* |
| Data items | 10a | List and define all outcomes for which data were sought. Specify whether all results that were compatible with each outcome domain in each study were sought (e.g. for all measures, time points, analyses), and if not, the methods used to decide which results to collect. | *Source Data on Figshare* |
| 10b | List and define all other variables for which data were sought (e.g. participant and intervention characteristics, funding sources). Describe any assumptions made about any missing or unclear information. | *Source Data on Figshare* |
| Study risk of bias assessment | 11 | Specify the methods used to assess risk of bias in the included studies, including details of the tool(s) used, how many reviewers assessed each study and whether they worked independently, and if applicable, details of automation tools used in the process. | *Methods* |
| Effect measures | 12 | Specify for each outcome the effect measure(s) (e.g. risk ratio, mean difference) used in the synthesis or presentation of results. | *Methods* |
| Synthesis methods | 13a | Describe the processes used to decide which studies were eligible for each synthesis (e.g. tabulating the study intervention characteristics and comparing against the planned groups for each synthesis (item #5)). | *Methods* |
| 13b | Describe any methods required to prepare the data for presentation or synthesis, such as handling of missing summary statistics, or data conversions. | *Methods* |
| 13c | Describe any methods used to tabulate or visually display results of individual studies and syntheses. | *Supplementary Fig. 7* |
| 13d | Describe any methods used to synthesize results and provide a rationale for the choice(s). If meta-analysis was performed, describe the model(s), method(s) to identify the presence and extent of statistical heterogeneity, and software package(s) used. | *Methods* |
| 13e | Describe any methods used to explore possible causes of heterogeneity among study results (e.g. subgroup analysis, meta-regression). | *Methods* |
| 13f | Describe any sensitivity analyses conducted to assess robustness of the synthesized results. | *Methods* |
| Reporting bias assessment | 14 | Describe any methods used to assess risk of bias due to missing results in a synthesis (arising from reporting biases). | *Supplementary Figs. 13 and 14* |
| Certainty assessment | 15 | Describe any methods used to assess certainty (or confidence) in the body of evidence for an outcome. | *Model Results on Figshare* |
| **RESULTS** | | |  |
| Study selection | 16a | Describe the results of the search and selection process, from the number of records identified in the search to the number of studies included in the review, ideally using a flow diagram. | *Supplementary Table 1* |
| 16b | Cite studies that might appear to meet the inclusion criteria, but which were excluded, and explain why they were excluded. | *Methods* |
| Study characteristics | 17 | Cite each included study and present its characteristics. | *Text S1* |
| Risk of bias in studies | 18 | Present assessments of risk of bias for each included study. | *N. A.* |
| Results of individual studies | 19 | For all outcomes, present, for each study: (a) summary statistics for each group (where appropriate) and (b) an effect estimate and its precision (e.g. confidence/credible interval), ideally using structured tables or plots. | *Supplementary Figs. 1 to 4* |
| Results of syntheses | 20a | For each synthesis, briefly summarise the characteristics and risk of bias among contributing studies. | *Supplementary Figs. 13 and 14* |
| 20b | Present results of all statistical syntheses conducted. If meta-analysis was done, present for each the summary estimate and its precision (e.g. confidence/credible interval) and measures of statistical heterogeneity. If comparing groups, describe the direction of the effect. | *Supplementary Figs. 1 to 4* |
| 20c | Present results of all investigations of possible causes of heterogeneity among study results. | *Model Results on Figshare* |
| 20d | Present results of all sensitivity analyses conducted to assess the robustness of the synthesized results. | *Model Results on Figshare* |
| Reporting biases | 21 | Present assessments of risk of bias due to missing results (arising from reporting biases) for each synthesis assessed. | *Supplementary Figs. 13 and 14* |
| Certainty of evidence | 22 | Present assessments of certainty (or confidence) in the body of evidence for each outcome assessed. | *Supplementary Figs. 1 to 4* |
| **DISCUSSION** | | |  |
| Discussion | 23a | Provide a general interpretation of the results in the context of other evidence. | *Results and discussion* |
| 23b | Discuss any limitations of the evidence included in the review. | *Results and discussion* |
| 23c | Discuss any limitations of the review processes used. | *N. A.* |
| 23d | Discuss implications of the results for practice, policy, and future research. | *Results and discussion* |
| **OTHER INFORMATION** | | |  |
| Registration and protocol | 24a | Provide registration information for the review, including register name and registration number, or state that the review was not registered. | *N. A.* |
| 24b | Indicate where the review protocol can be accessed, or state that a protocol was not prepared. | *N. A.* |
| 24c | Describe and explain any amendments to information provided at registration or in the protocol. | *N. A.* |
| Support | 25 | Describe sources of financial or non-financial support for the review, and the role of the funders or sponsors in the review. | *Acknowledgments* |
| Competing interests | 26 | Declare any competing interests of review authors. | *Conflict of interest* |
| Availability of data, code and other materials | 27 | Report which of the following are publicly available and where they can be found: template data collection forms; data extracted from included studies; data used for all analyses; analytic code; any other materials used in the review. | *Data availability statement* |

**
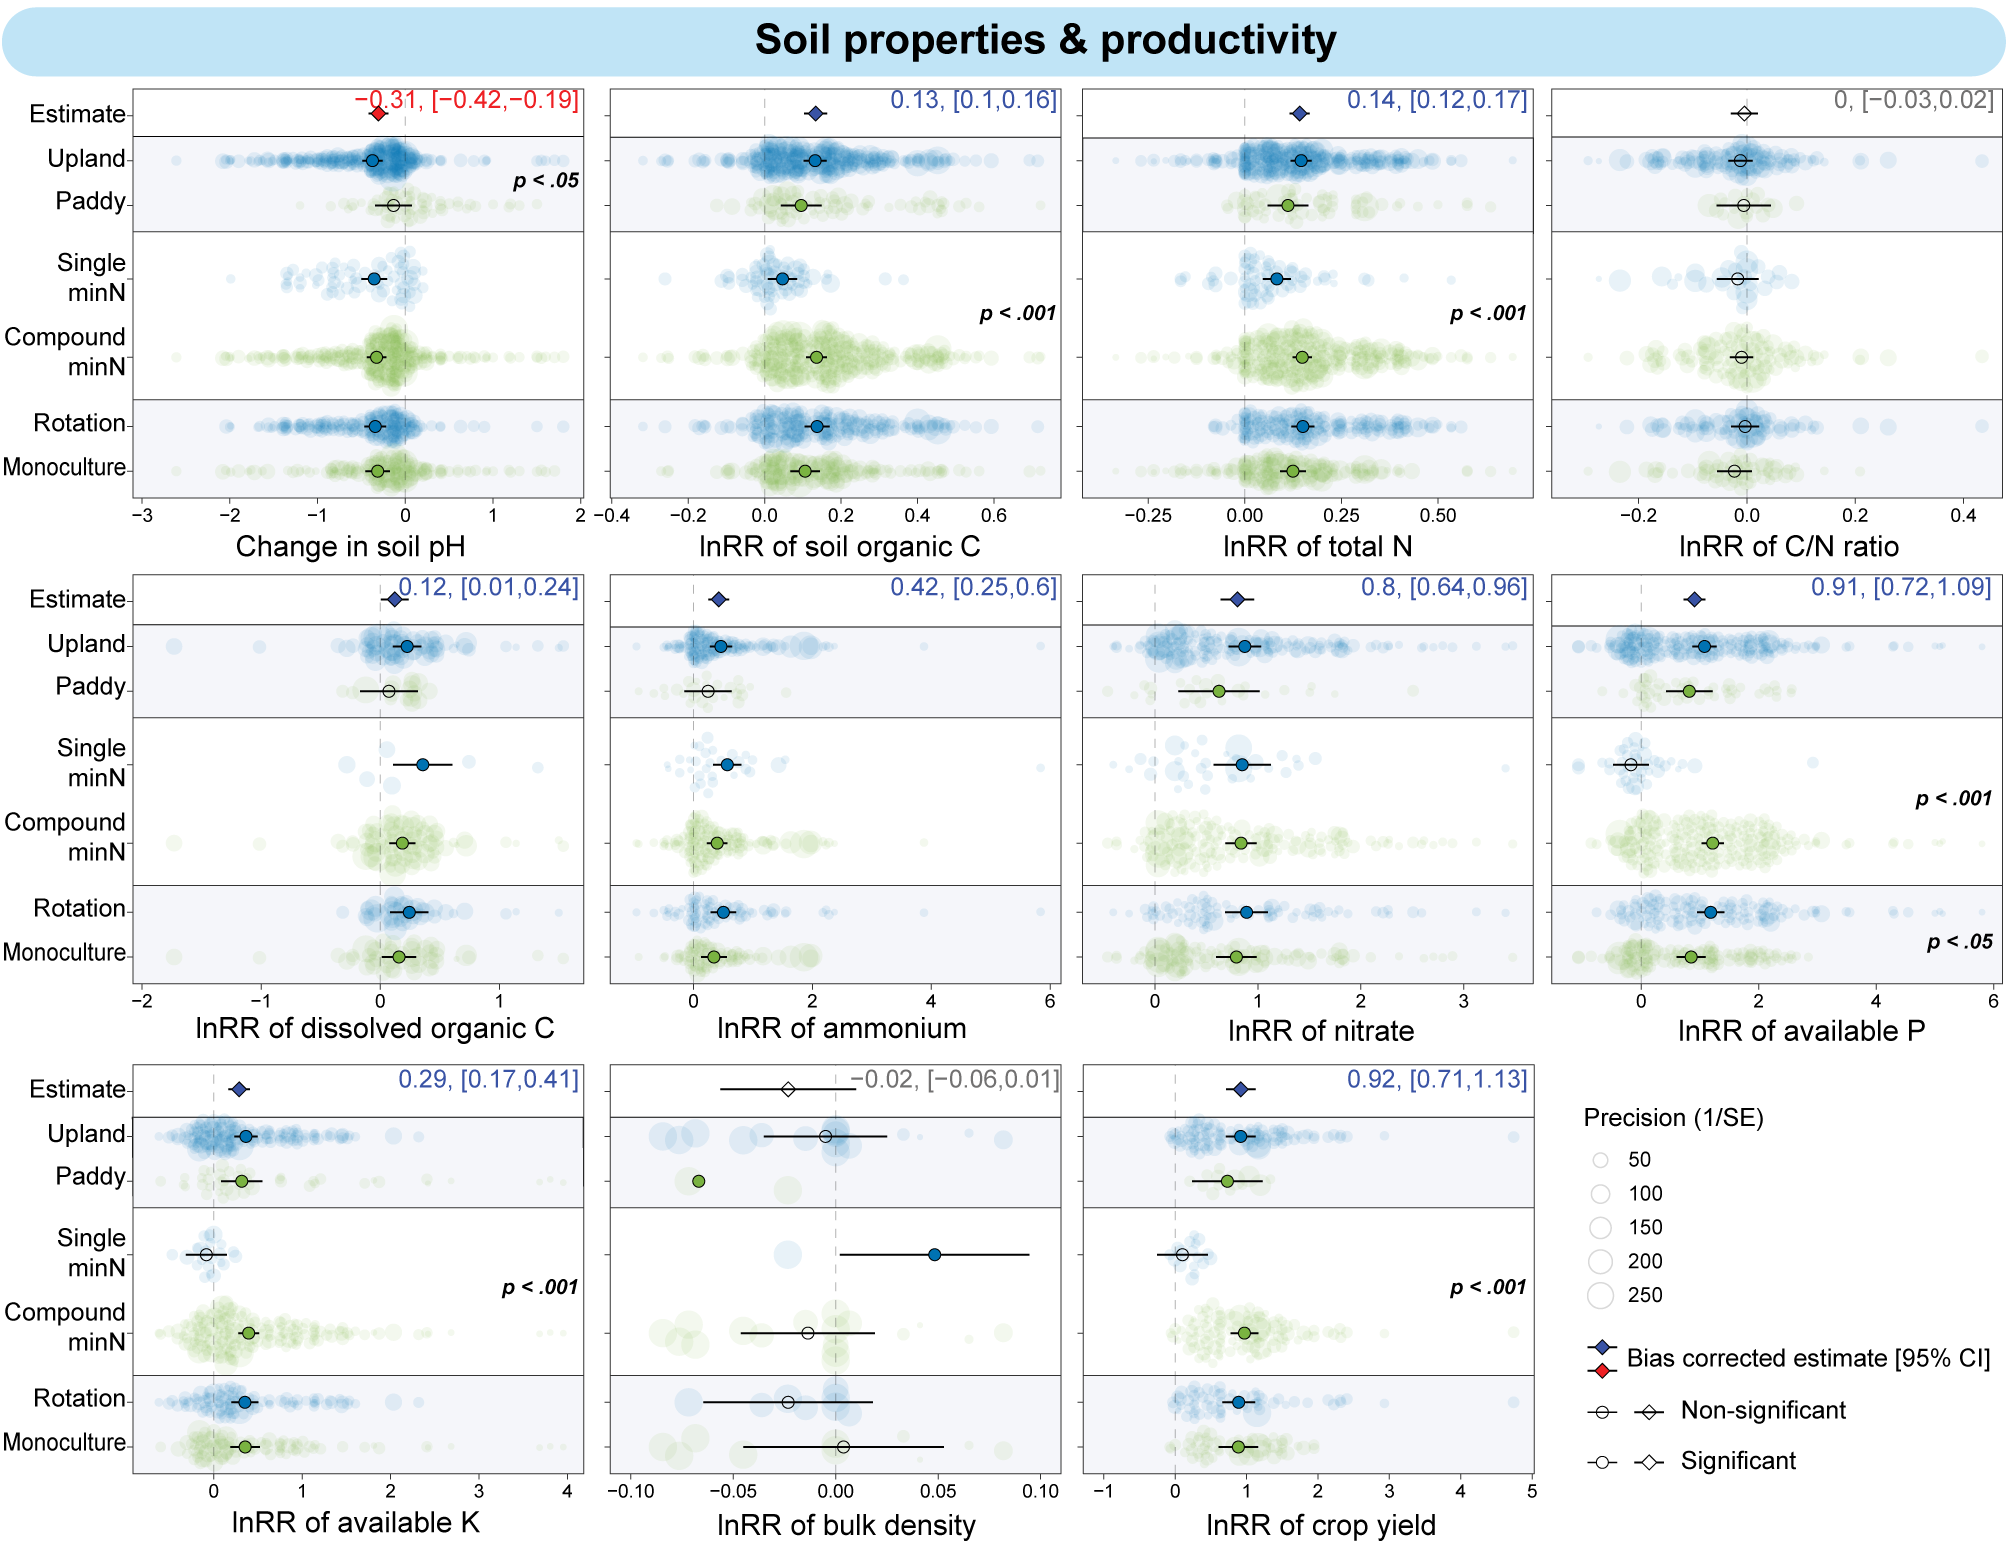
**

**Supplementary Fig. 1. Effect of long-term mineral fertilization on soil properties and crop productivity.** Bias-corrected estimates (±95% confidence intervals) are shown for overall effects (diamonds) and subgroup-level estimates (circles) grouped by agroecosystem type (upland *vs.* paddy), fertilization regime (single *vs.* compound mineral N), and cropping regime (rotation *vs.* monoculture). Changes in soil pH are expressed as mean differences between fertilized and control; all other variables are expressed as log response ratios (lnRR). Solid blue and red diamonds indicate significant overall positive and negative effects, respectively; open diamonds indicate non-significant overall effects. Circles represent subgroup estimates, with point size scaled by precision (1/standard error); open circles denote non-significant effects. *p* values indicate the significance of subgroup contrasts, reported only when the overall effect is significant.

**
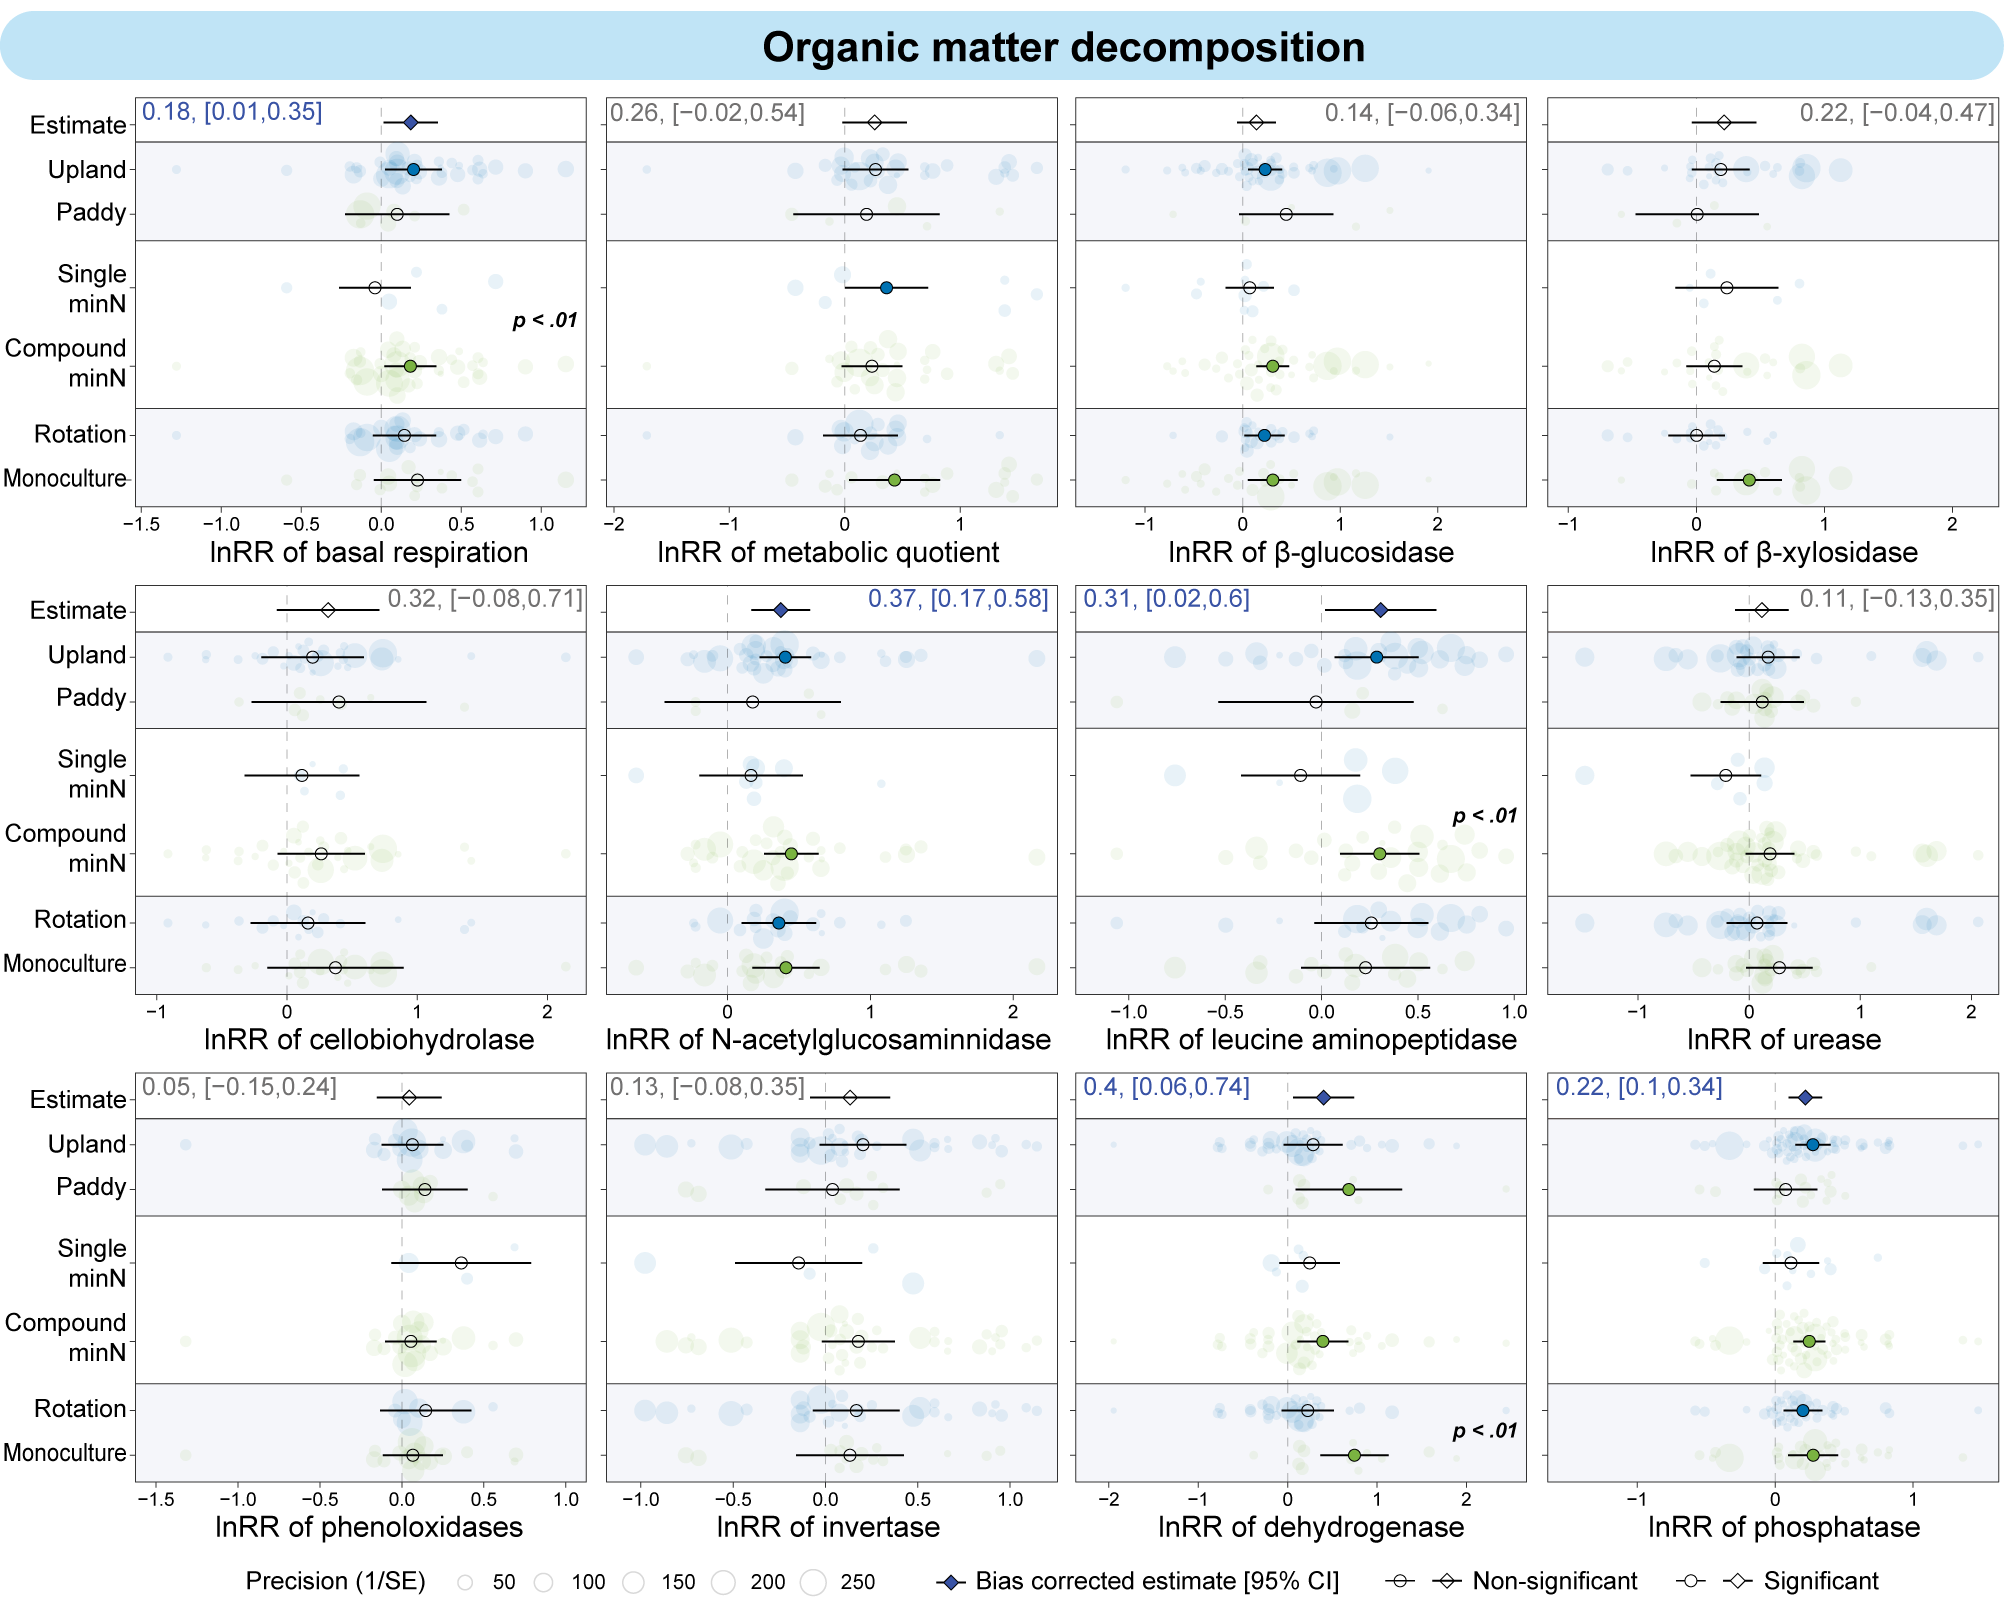
**

**Supplementary Fig. 2.** **Effects of long-term mineral fertilization on microbial activities relevant to organic matter decomposition.** Overall effects are shown as diamonds, subgroup-level estimates as circles, with point size proportional to precision (1/standard error). Other legend details are as described in Supplementary Fig. 1.


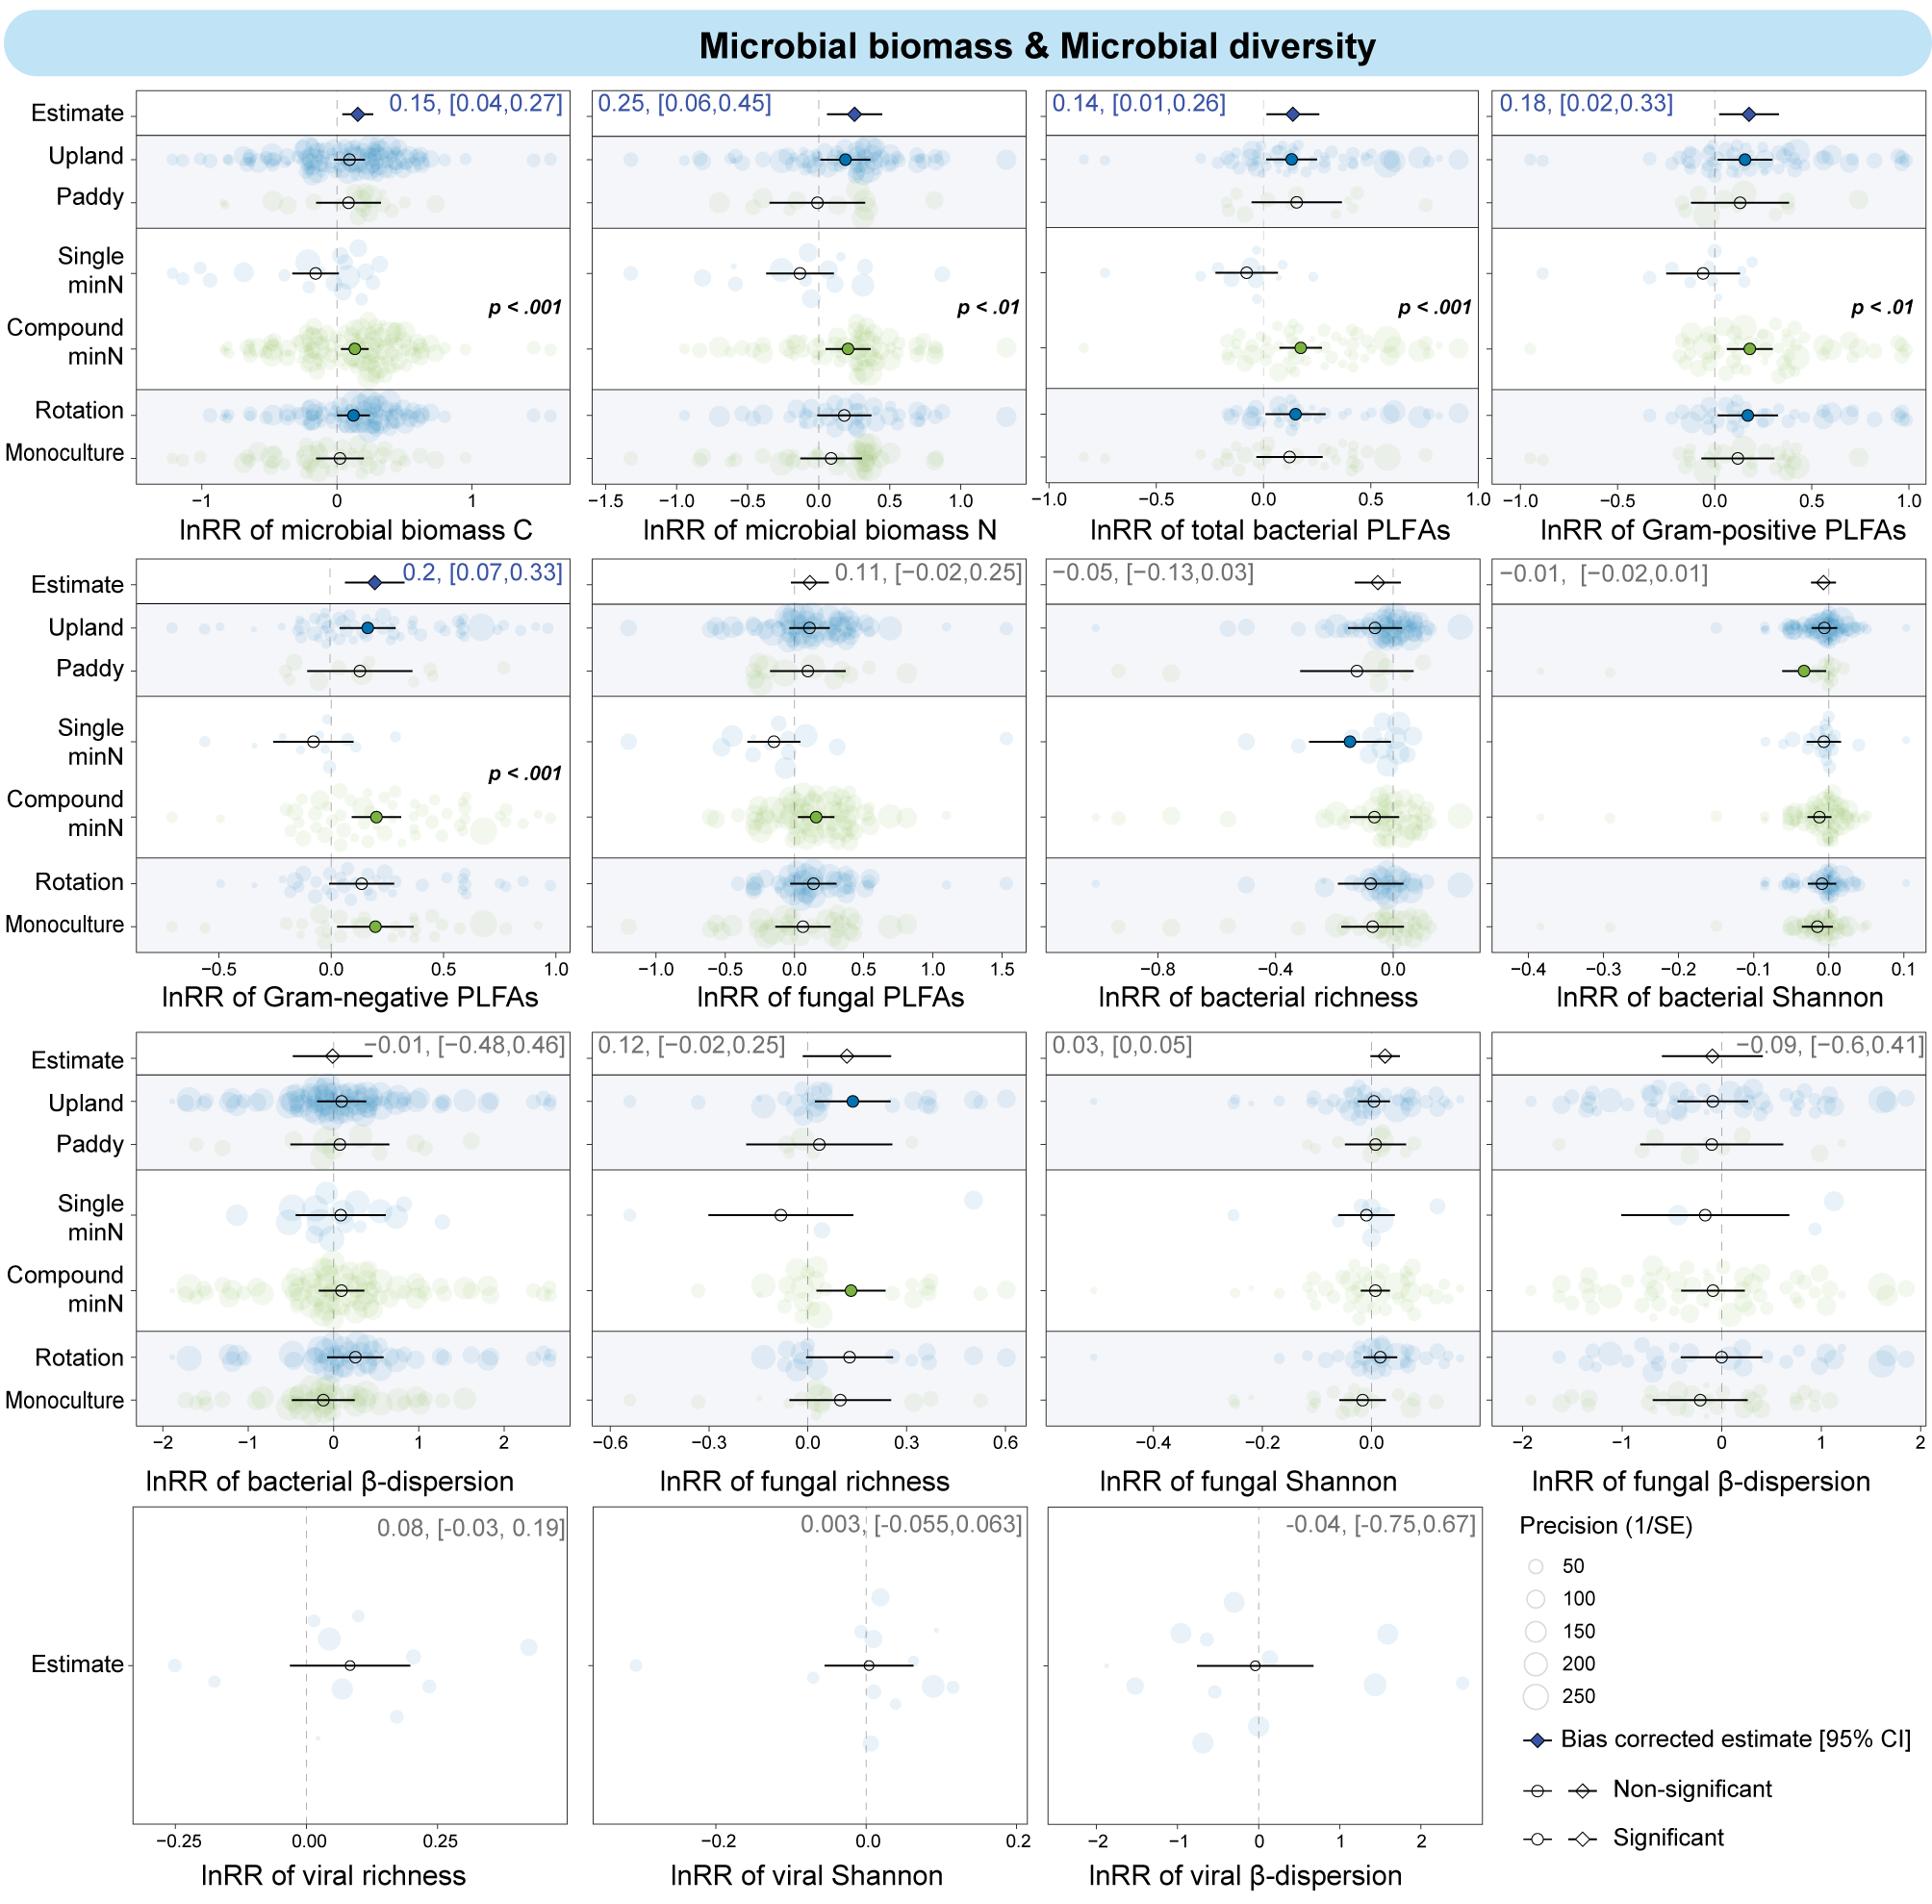


**Supplementary Fig. 3. Effects of long-term mineral fertilization on microbial biomass and diversity.** Overall effects are shown as diamonds, subgroup-level estimates as circles, with point size proportional to precision (1/standard error). Other legend details are as described in Supplementary Fig. 1. Viral diversity metrics were excluded from subgroup analysis and publication bias correction because they were exclusively derived from our targeted field sampling.


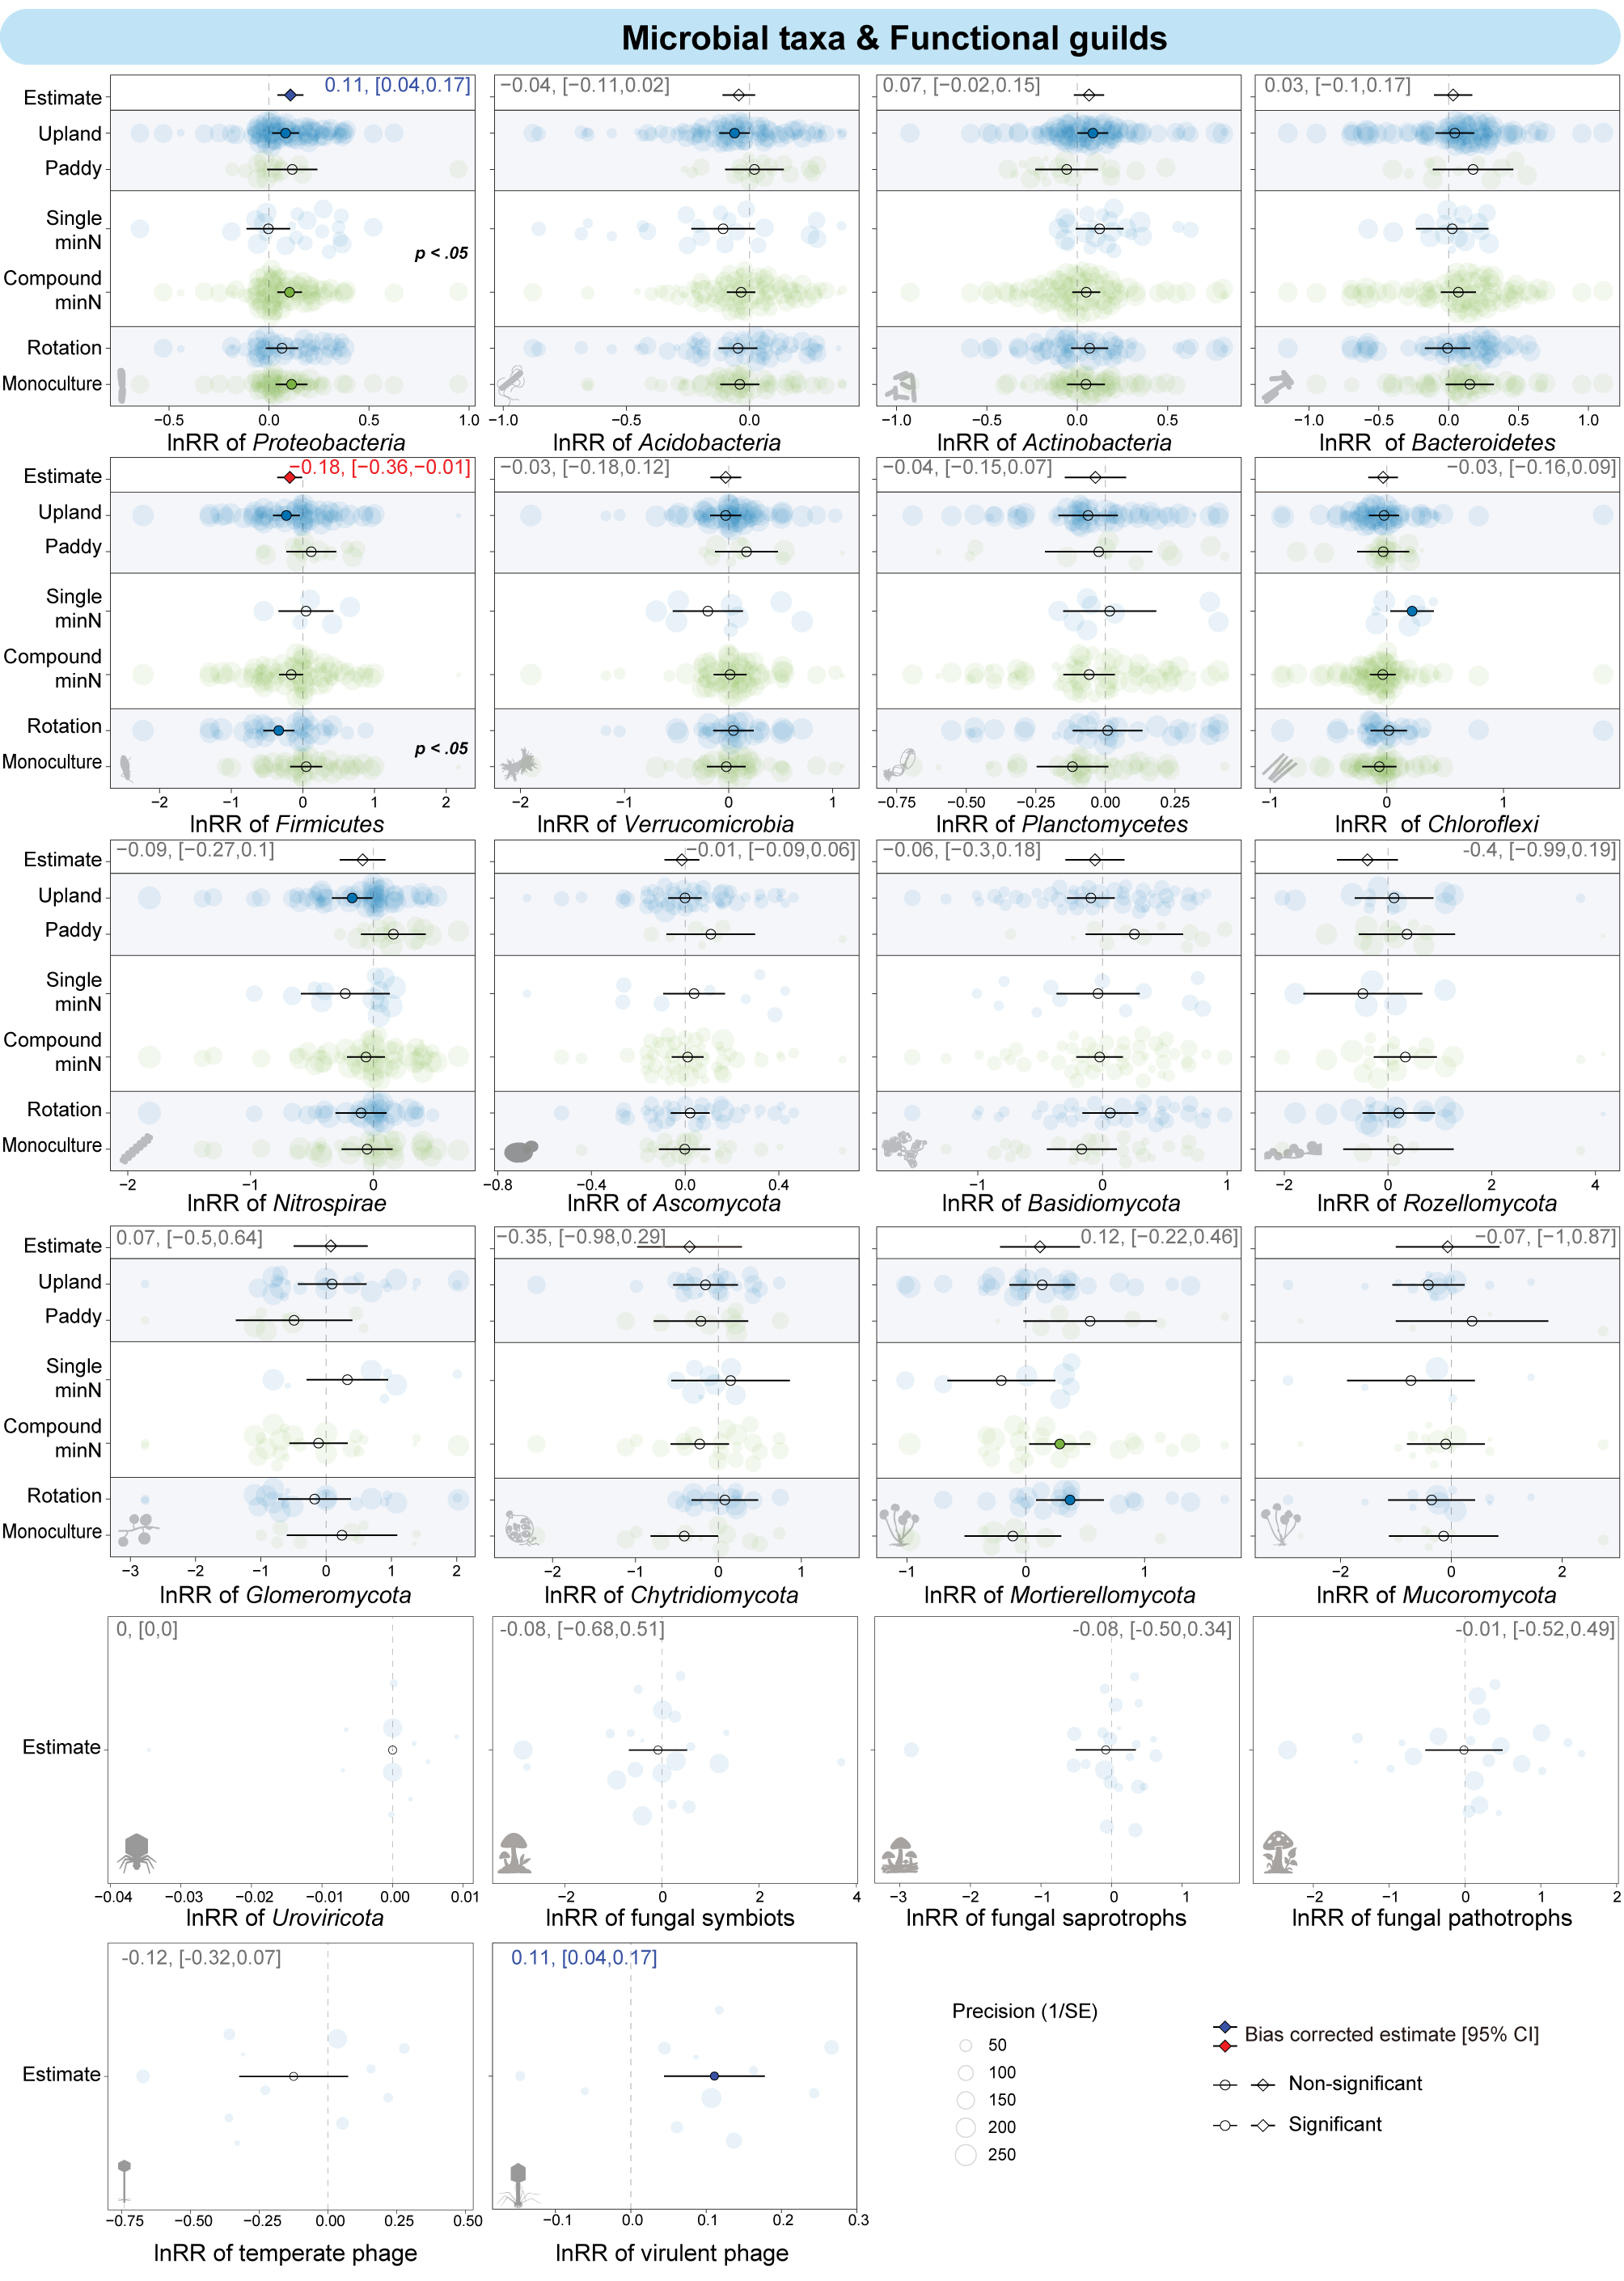


**Supplementary Fig. 4. Effects of long-term mineral fertilization on microbial taxa and functional guilds.** Overall effects are shown as diamonds, subgroup-level estimates as circles, with point size proportional to precision (1/standard error). Other legend details are as described in Supplementary Fig. 1. Viral phyla and functional guilds were not subjected to subgroup analysis because of their limited representation in the literature and their primary presence in our field-sampled dataset. Silhouettes are from PhyloPic (http://phylopic.org).

**
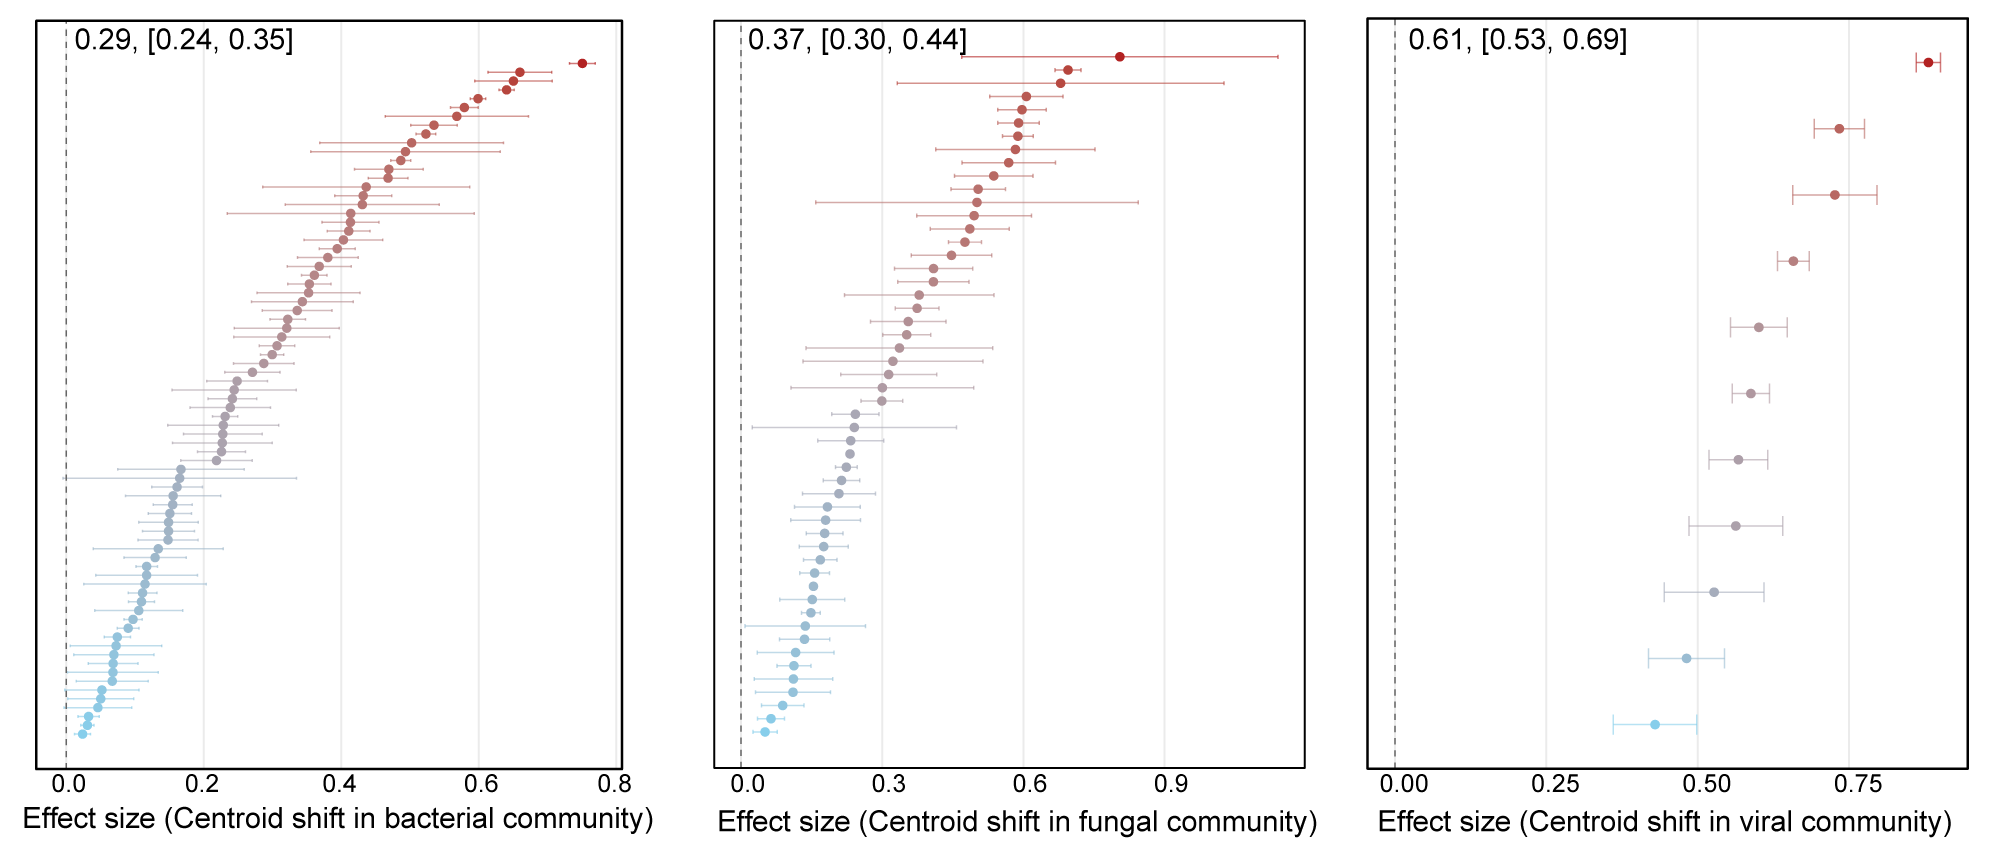
**

**Supplementary Fig. 5. Microbial community centroid shifts in response to long-term mineral fertilization.** Effect sizes represent centroid shifts between fertilized and control groups, quantified as Euclidean distances based on the first two axes of unconstrained ordination derived from dissimilarity matrices. Given that centroid shifts are inherently non-negative and may exhibit skewed distributions, a nonparametric bootstrap approach was applied to obtain unbiased estimates of both effect sizes and their sampling variances (see Methods). For each study, sample identities were resampled with replacement within fertilized and control groups (1,000 iterations), and the mean distance between group centroids was used as the effect size. The standard deviation of bootstrap replicates was used to estimate the standard error for subsequent multilevel meta-analysis.

**
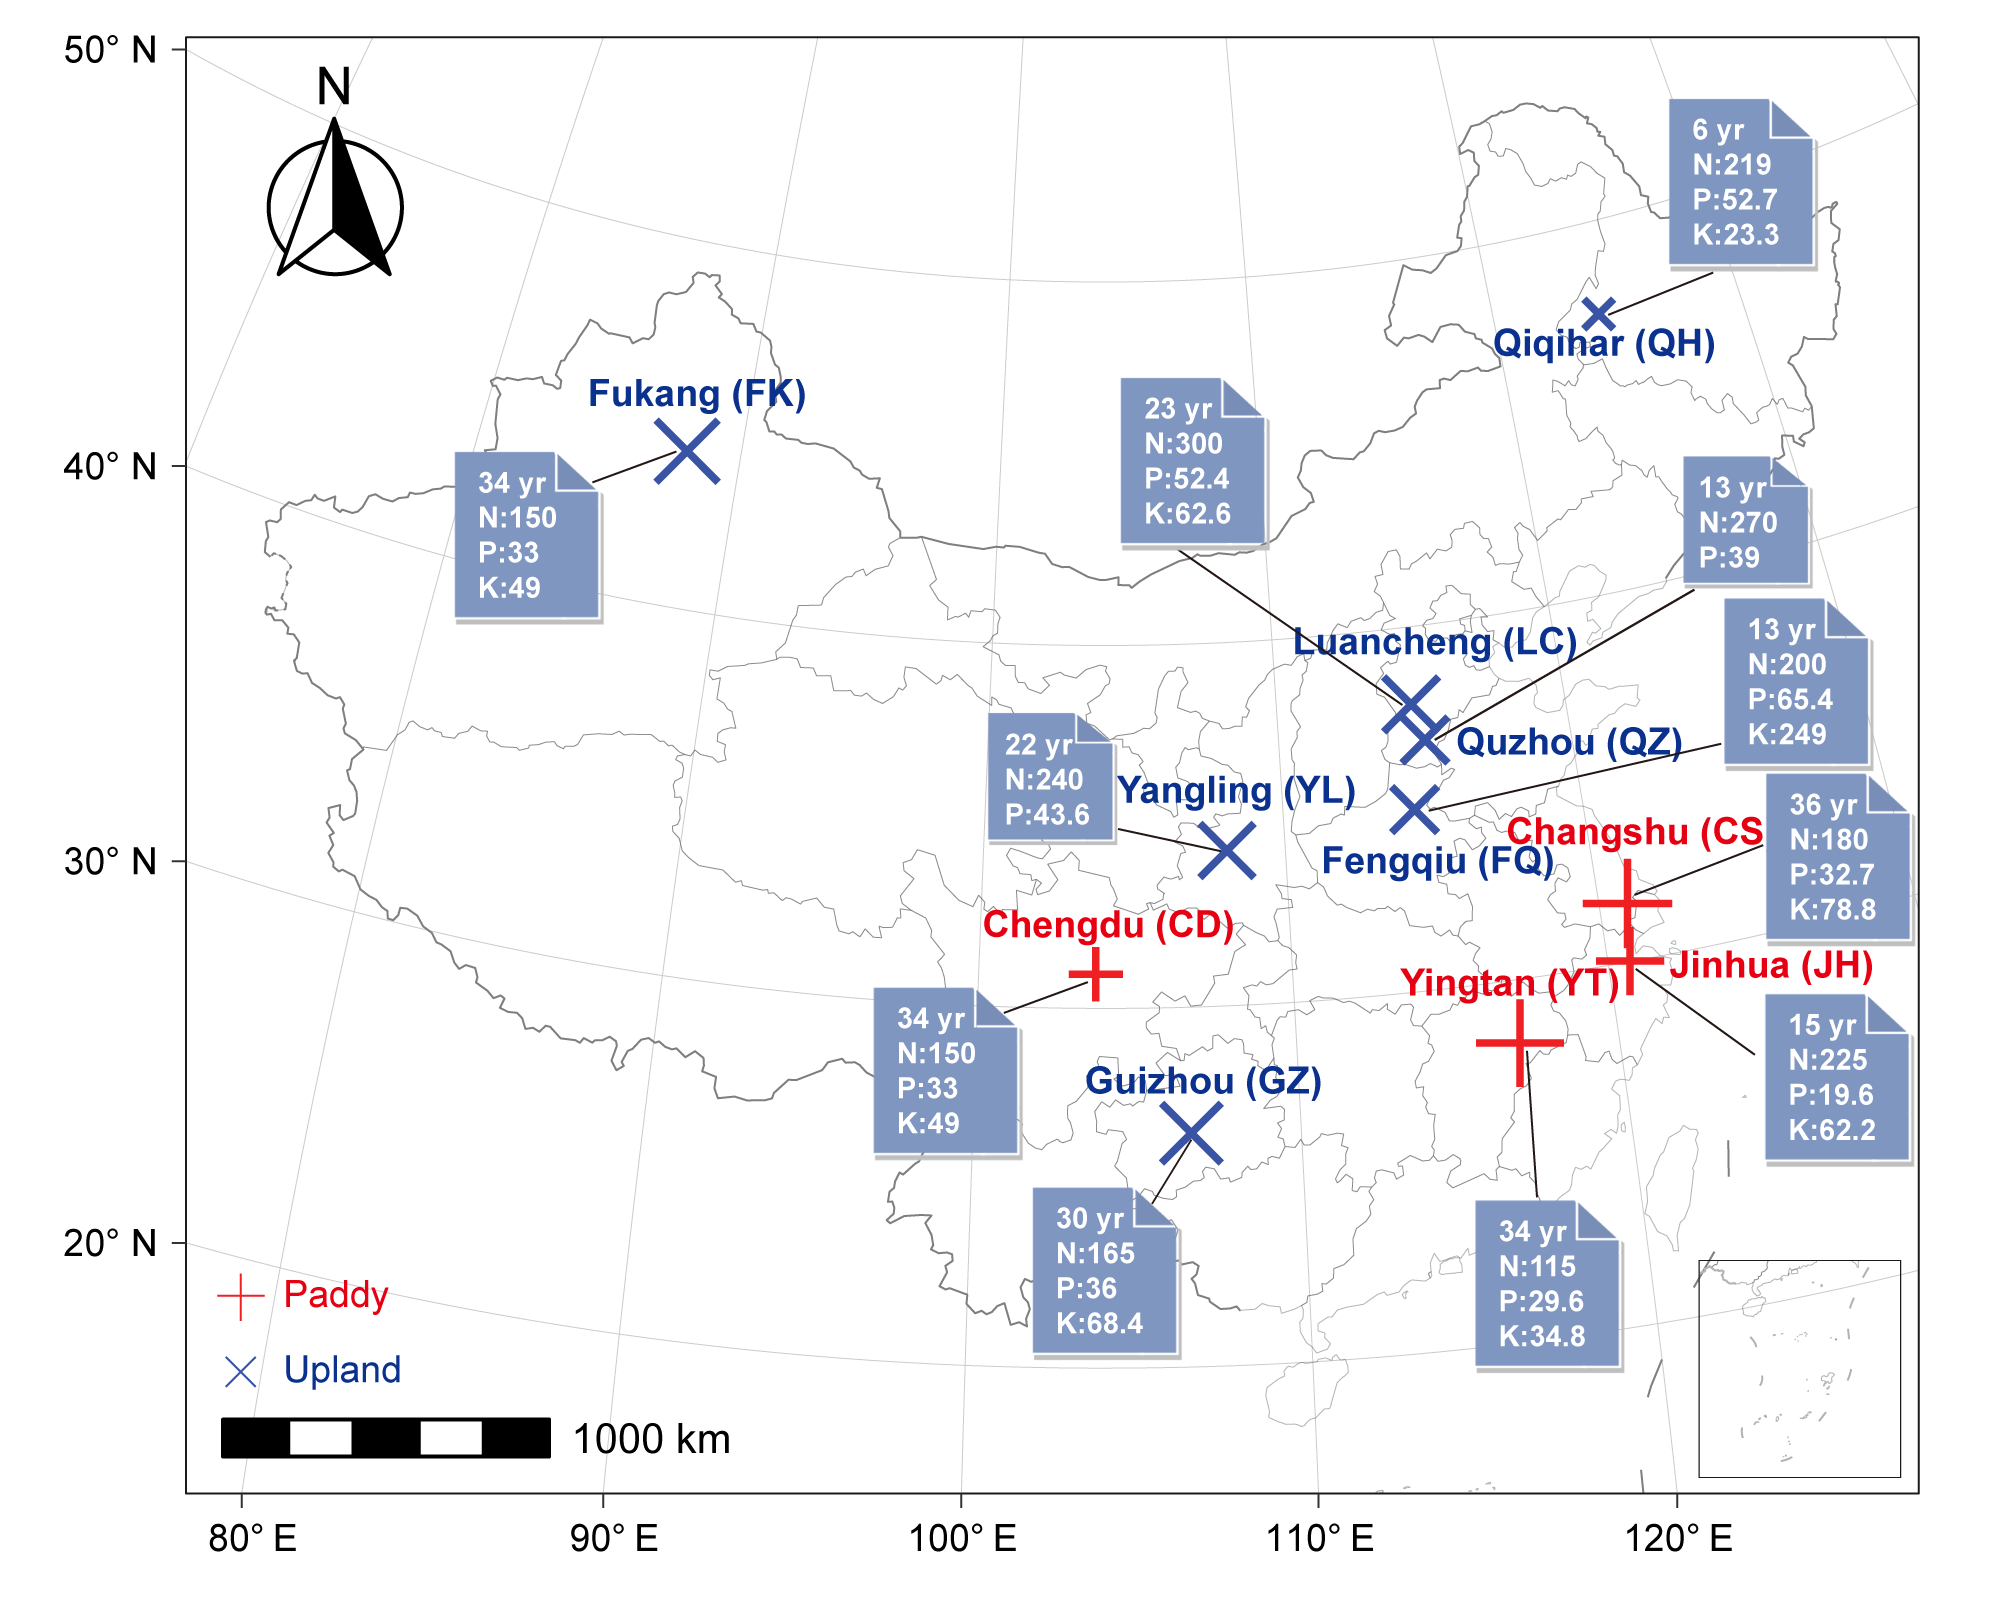
**

**Supplementary Fig. 6. Geographic distribution of the 11 long-term fertilization experiments (LTEs) included in our targeted field sampling across China.** Symbols indicate upland (blue crosses) and paddy (red crosses) agroecosystems. Labels show fertilization duration (in years) and average annual application rates of nitrogen (N), phosphorus (P), and potassium (K), expressed as elemental nutrients (kg ha-1 yr-1). Associated metadata are provided in the Source Data.

**
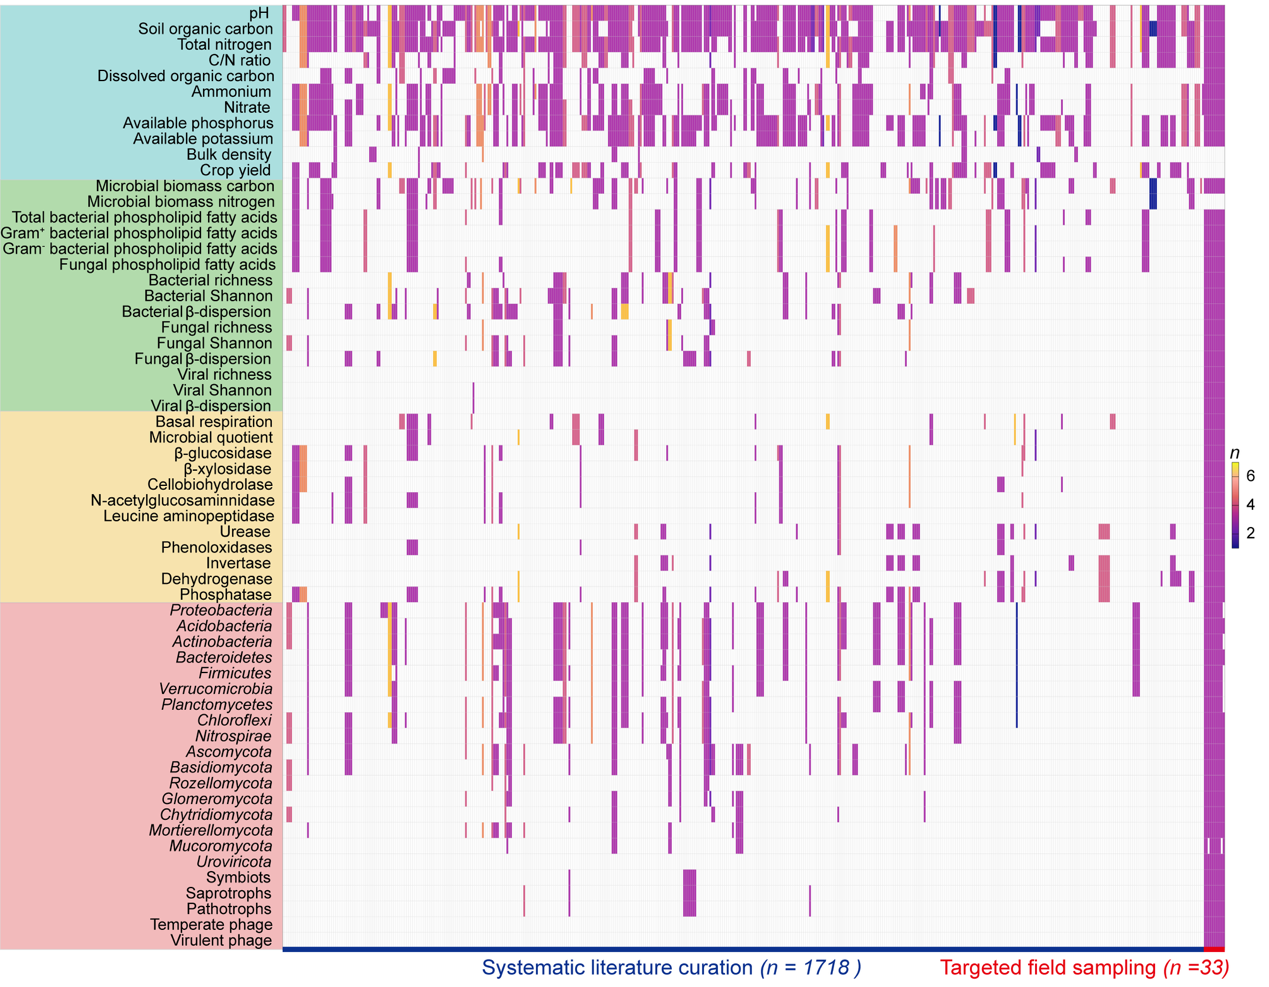
**

**Supplementary Fig. 7. Coverage of variables across the global dataset compiled from systematic literature curation and targeted field sampling.** Columns correspond to individual studies. Color intensity reflects the number of paired observations (*n* = 1,751 in total) recorded for each variable within each study. Our sampling complemented literature data by improving coverage of underrepresented variables.

**
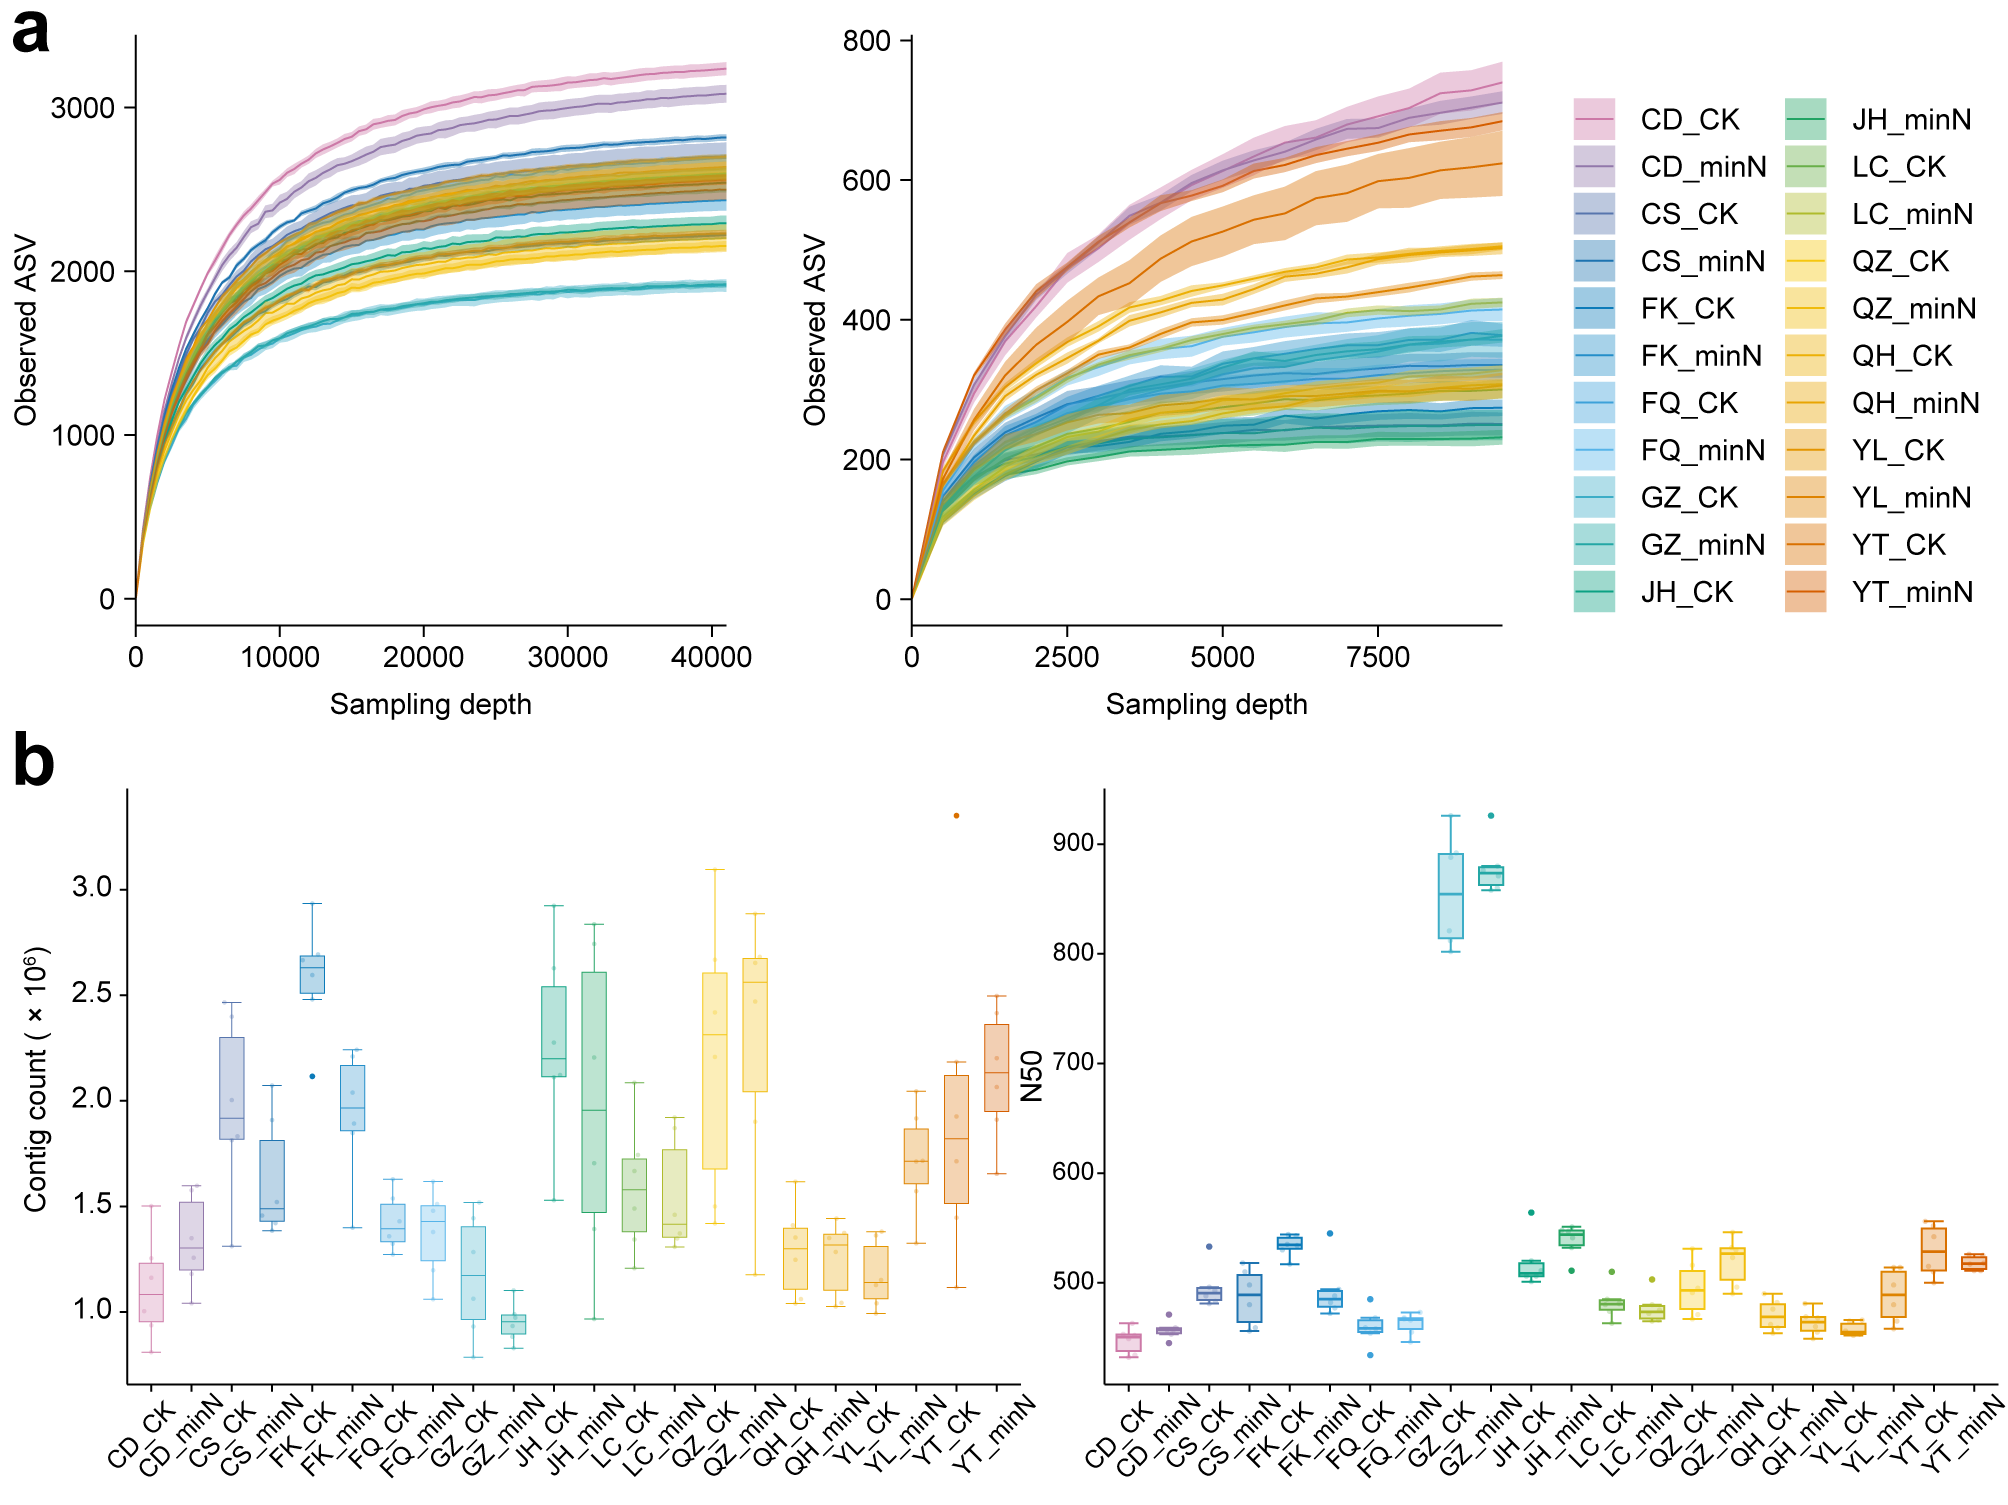
**

**Supplementary Fig. 8. Sequencing depth and assembly quality of amplicon and metagenomic data.** (**a**) Rarefaction curves showing observed amplicon sequence variants (ASVs) as a function of sequencing depth for 16S rRNA (left) and ITS (right) datasets across our sampling sites. (**b**) Boxplots showing the number of assembled contigs (left) and N50 values (right) derived from metagenomic sequencing. N50 represents the contig length above which 50% of the total assembly length is contained. Sample site abbreviations are defined in Supplementary Fig. 6.

**
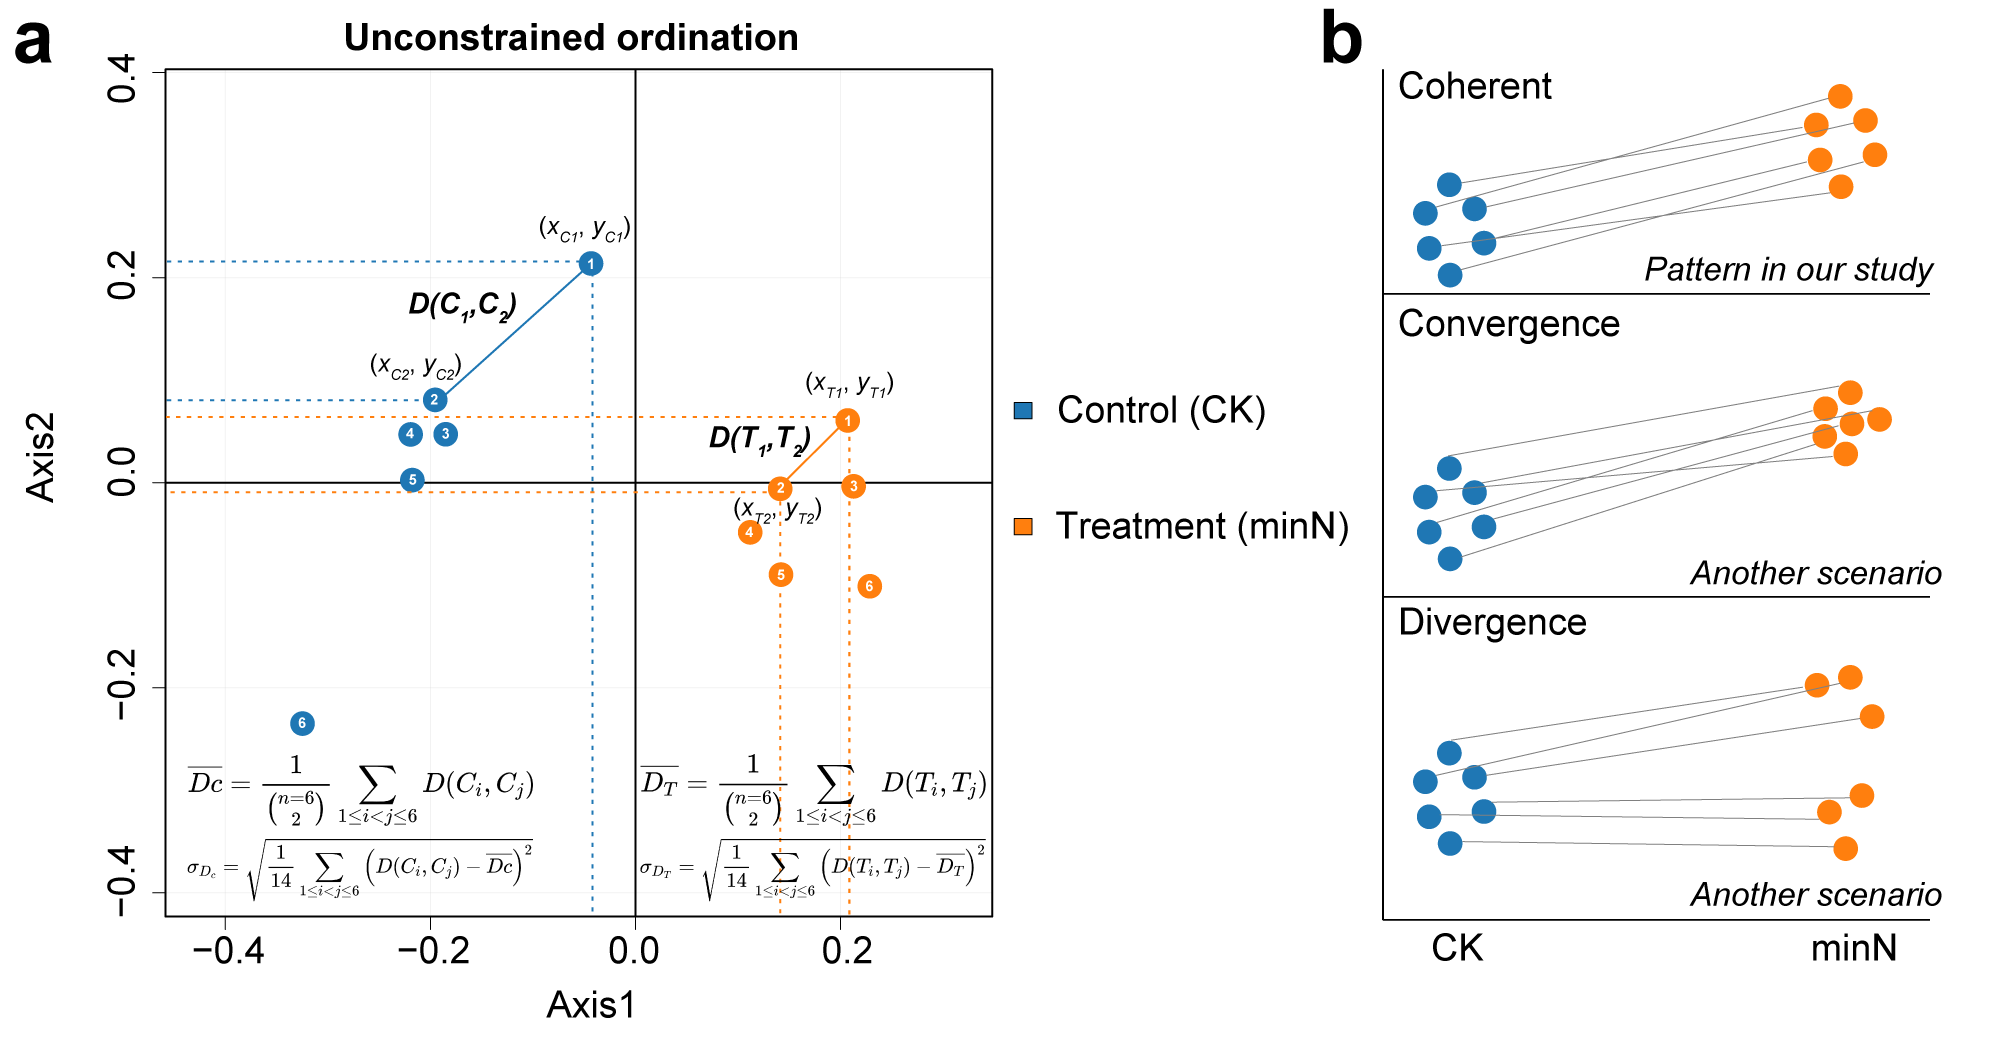
**

**Supplementary Fig. 9. Conceptual illustration of β-dispersion based on unconstrained ordination.** (**a**) Two example groups illustrating the calculation of β-dispersion, defined as the average pairwise Euclidean distance among samples within a group (, ). This metric quantifies within-group variability in microbial community. Coordinates are derived from unconstrained ordination of dissimilarity matrices. (**b**) Possible β-dispersion scenarios: coherent dispersion (as observed in our study), reduced dispersion (convergence), and increased dispersion (divergence).

**
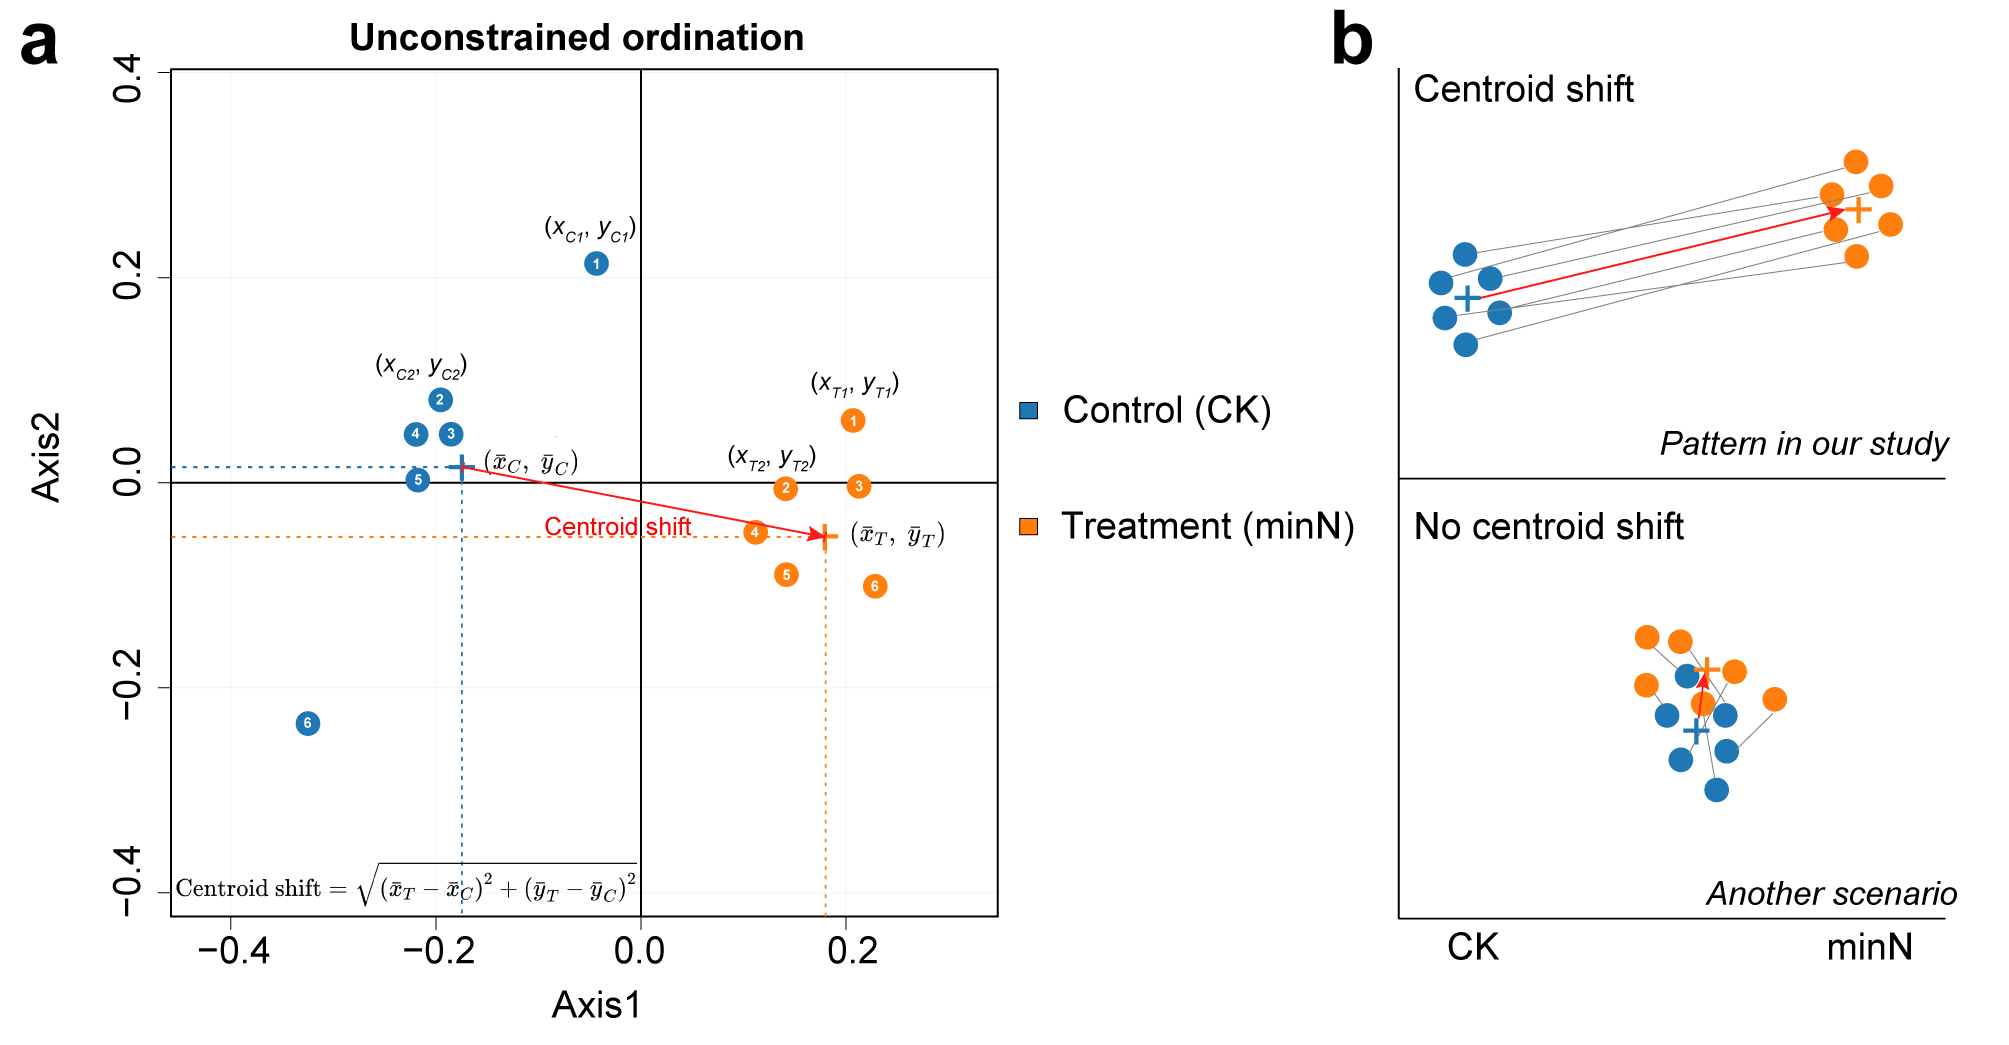
**

**Supplementary Fig. 10. Conceptual illustration of centroid shift based on unconstrained ordination.** (**a**) Centroid shift quantifies the difference in microbial community composition between groups as the Euclidean distance between group centroids in unconstrained ordination space. Sample coordinates are derived from dissimilarity-based ordination, and group centroids (,) and (,) are calculated as the mean position of all samples within each group. (**b**) Possible centroid shift scenarios: clear shift in community centroid (as observed in our study) and no shift in centroid position.

**
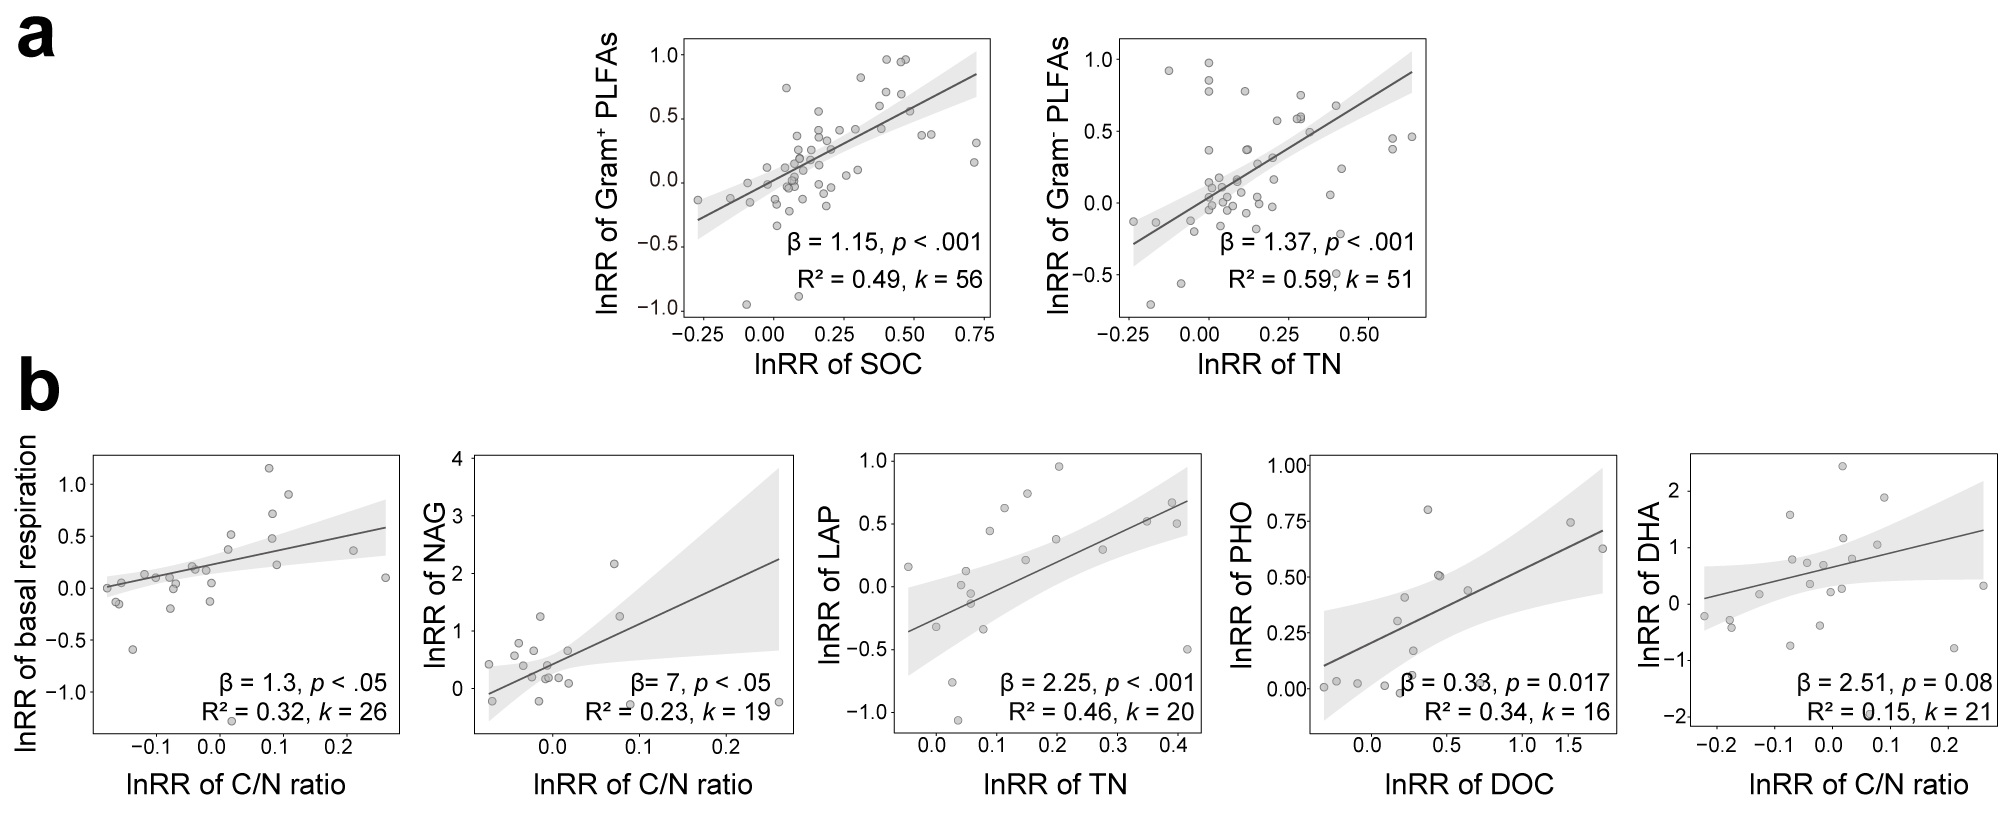
**

**Supplementary Fig. 11. Soil physicochemical properties explain increases in microbial biomass and activity under long-term mineral fertilization.** Inverse-variance weighted linear regressions were used to examine associations between changes in soil properties and microbial responses, based on log response ratios (lnRR) derived from meta-analysis. β indicates regression slope, R2 denotes coefficient of determination, and *k* is the number of effect sizes.

**
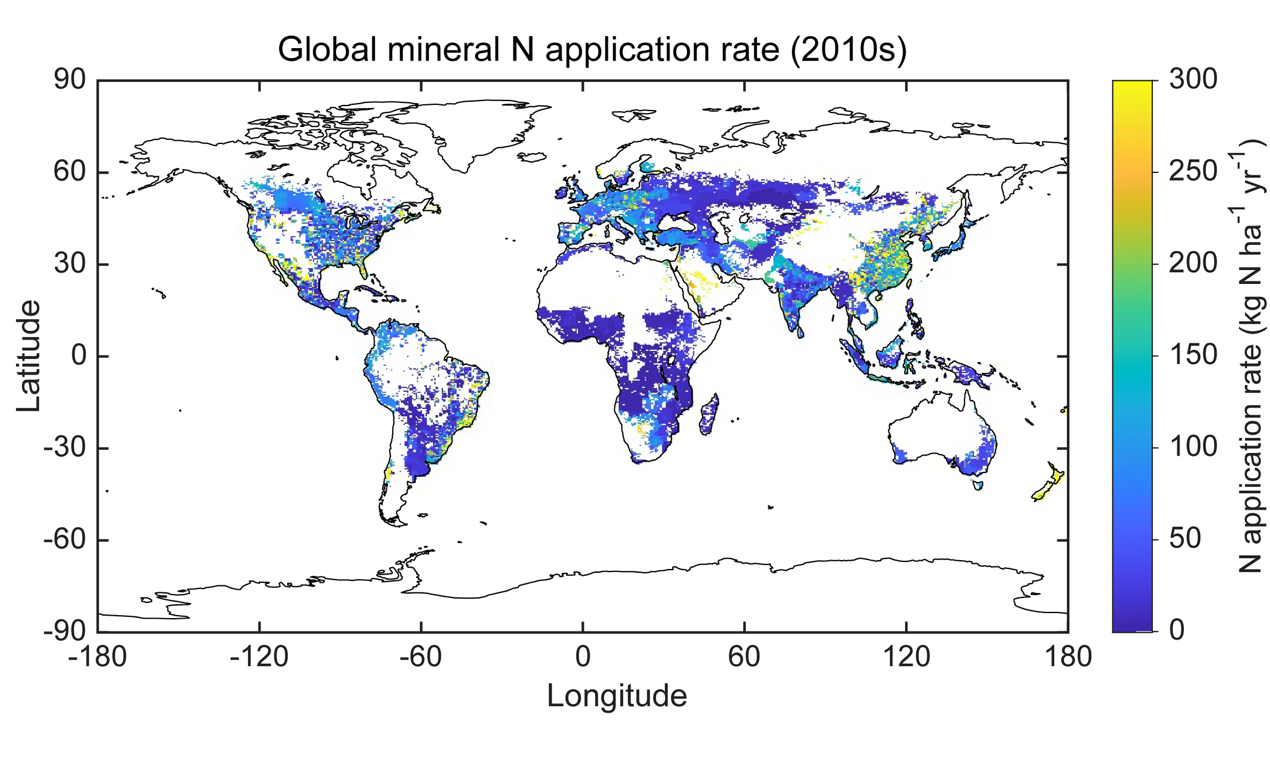
**

**Supplementary Fig. 12. Global distribution of average annual mineral nitrogen application rates in the 2010s.** The map shows the spatial distribution of mineral nitrogen (N) inputs to croplands, averaged over 2011–2020, at a resolution of 5 arc-minutes. Data were obtained from the National Tibetan Plateau/Third Pole Environment Data Center19. Color scale represents N application rates in kg N ha-1 yr-1.

**
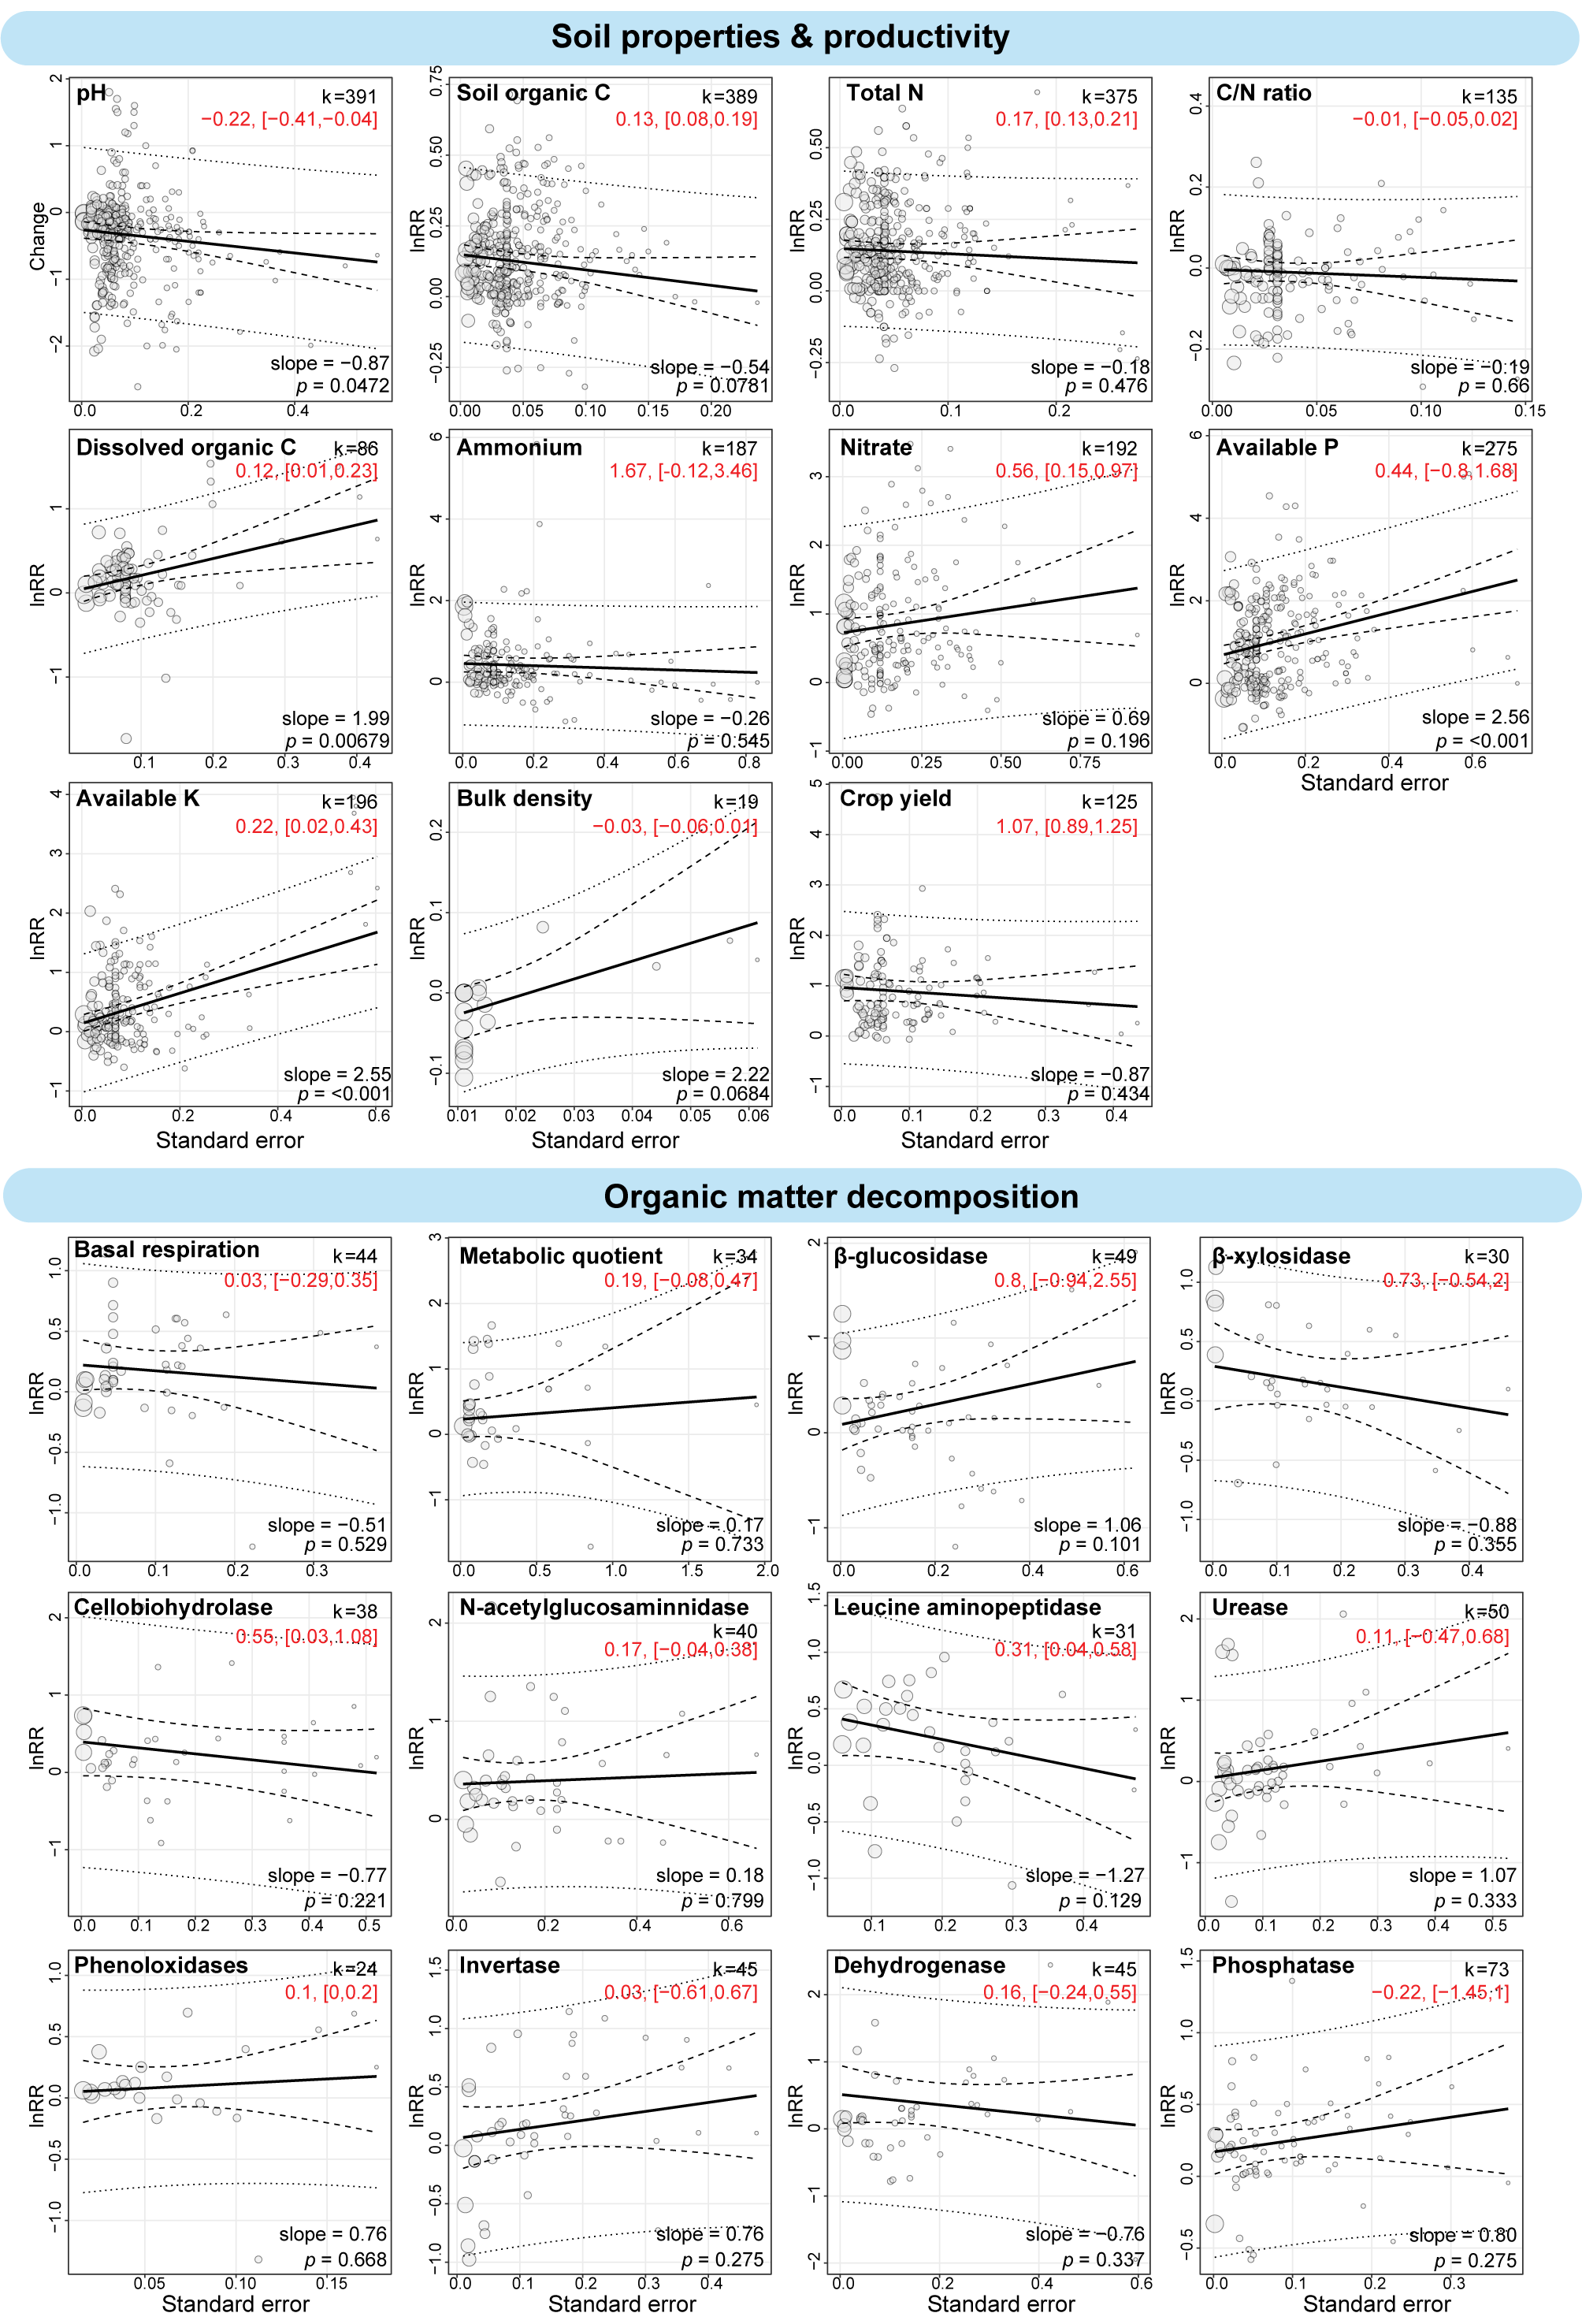
**

**Supplementary Fig. 13. Assessment of publication bias.** Funnel plots were used to evaluate potential publication bias in effect size estimates (lnRR) using Egger’s regression test. Each point represents an individual effect size (*k*), plotted against its standard error. The solid black line denotes the fitted regression line, with dashed lines indicating the 95% confidence intervals. A significant slope (*p* < 0.05) indicates potential publication bias. Values in parentheses show the bias-corrected overall effect sizes and 95% confidence intervals estimated using the two-step method20.

**
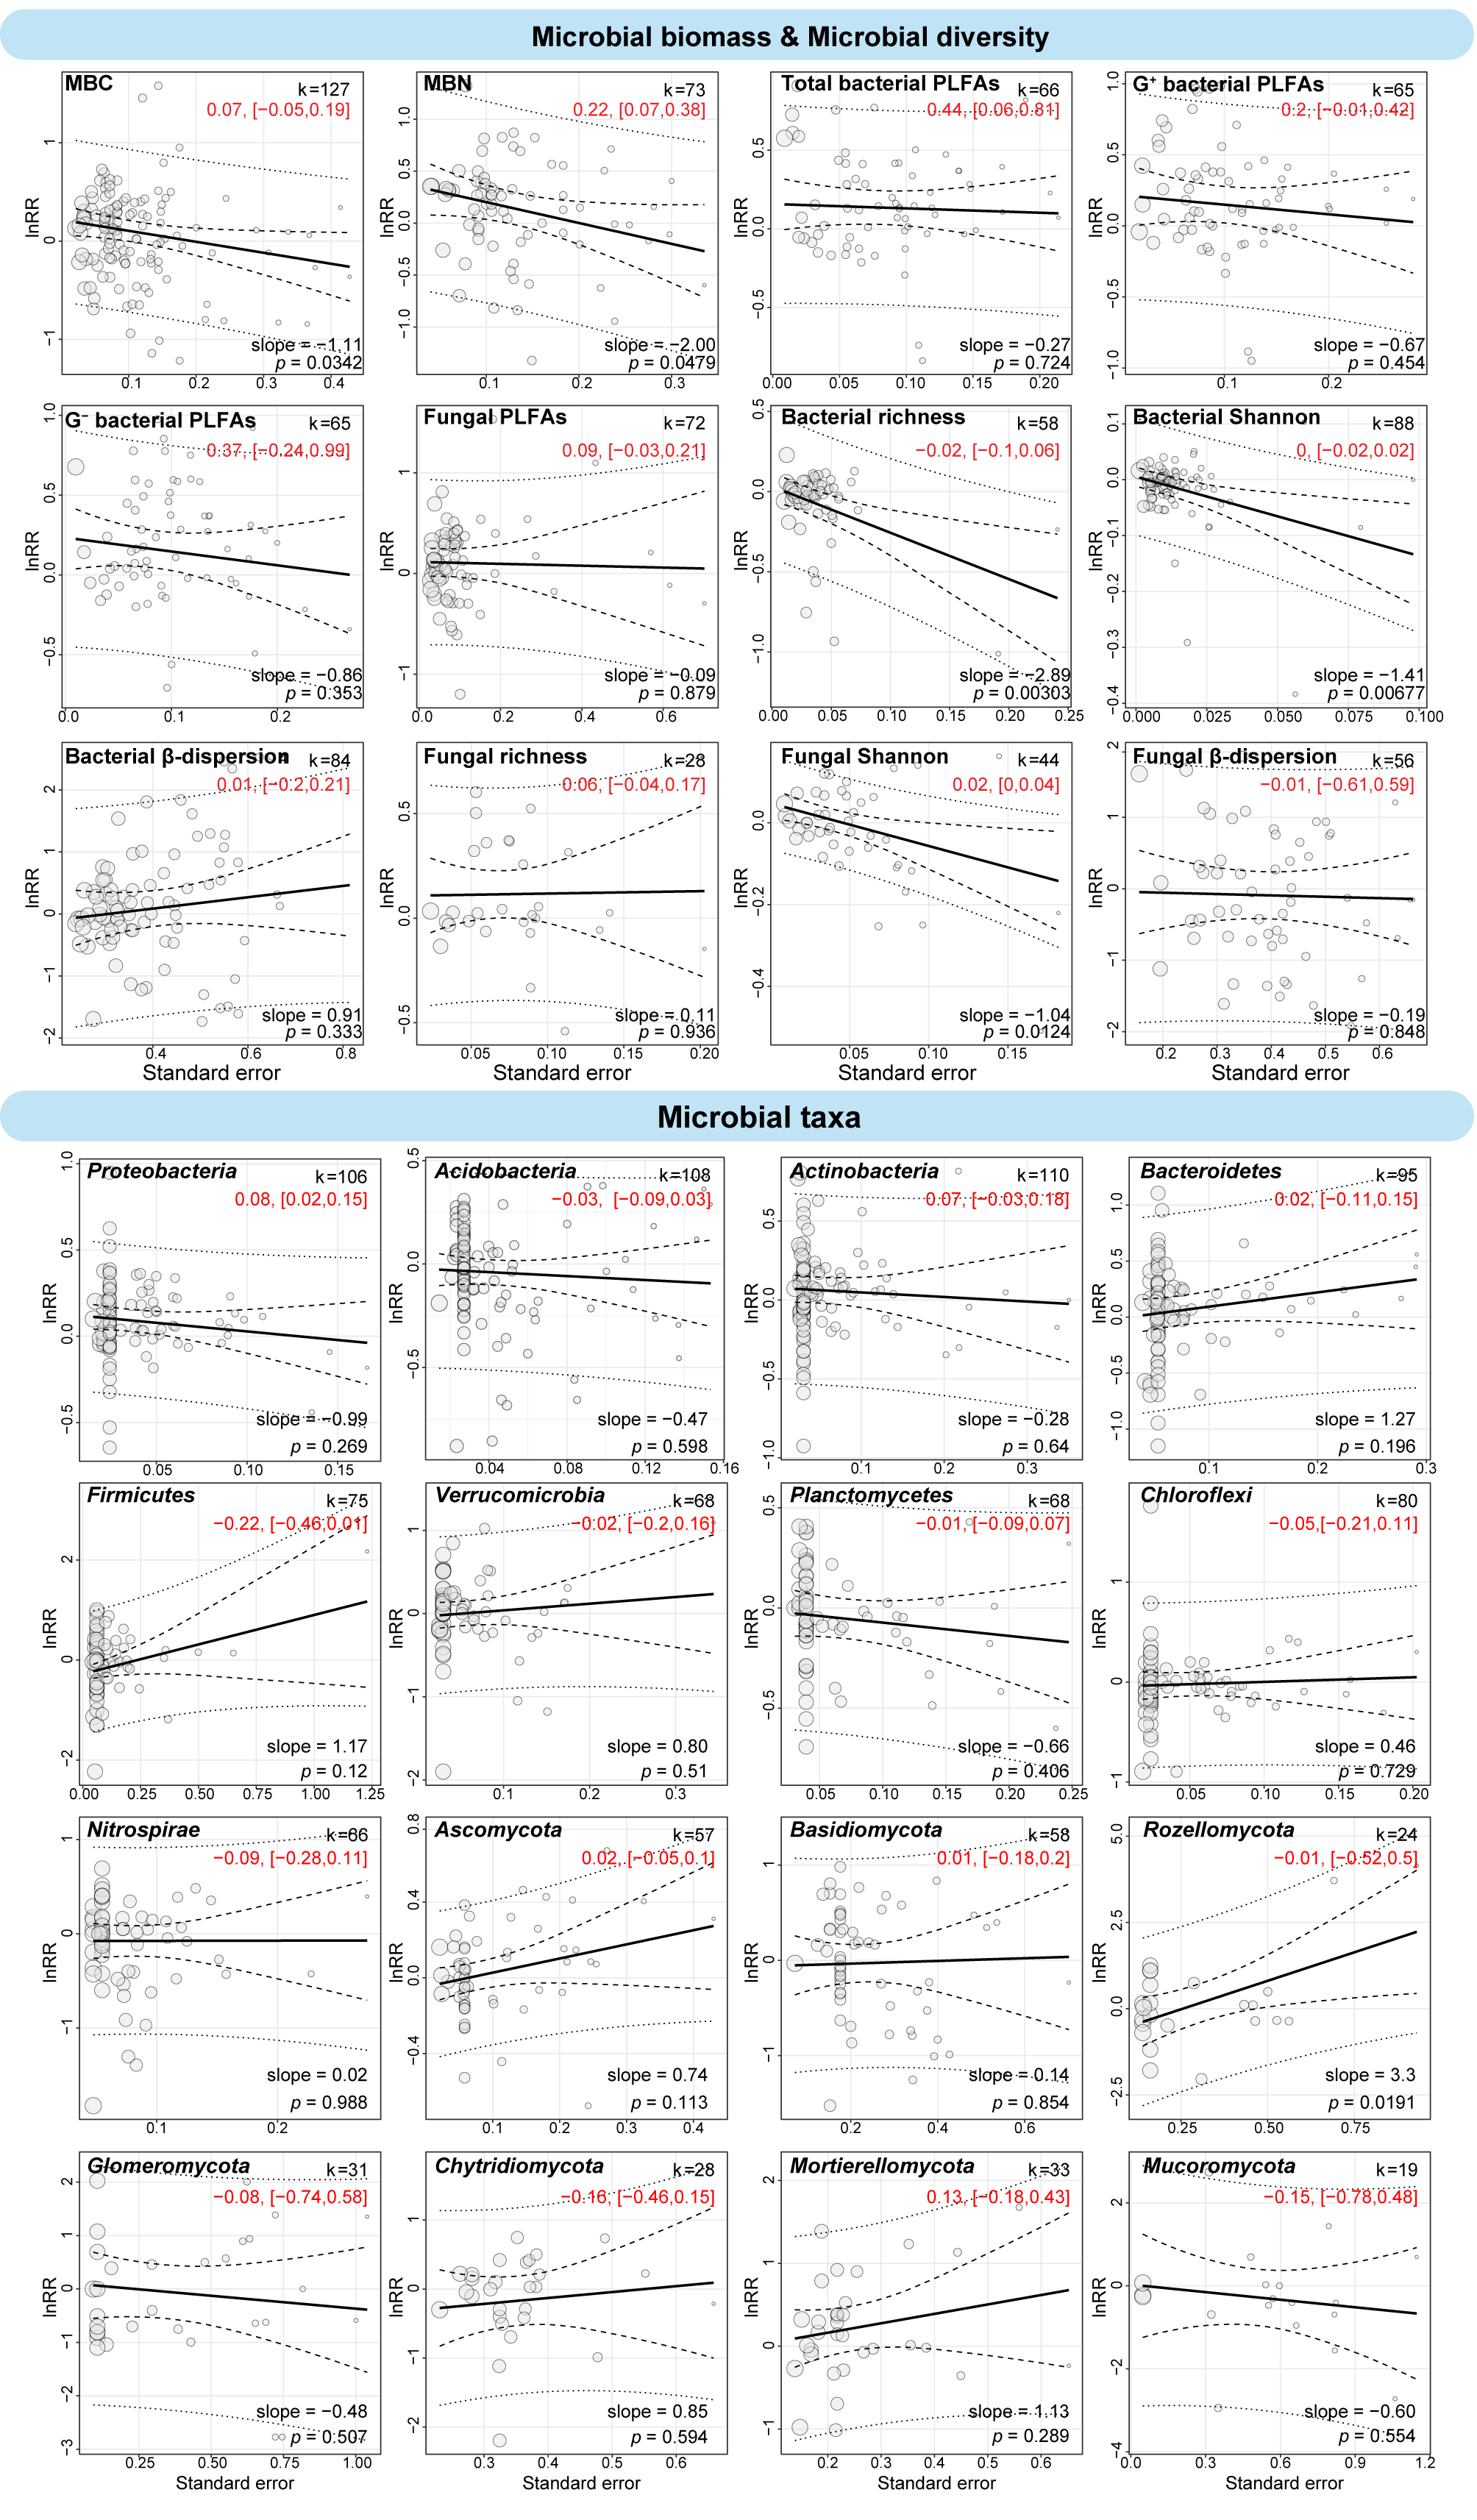
**

**Supplementary Fig. 14. Assessment of publication bias.** Egger’s regression plots and bias-corrected estimates shown as in Supplementary Fig. 13.

**Text S1.** Primary studies included in the meta-analysis.

1 Zhou, J. *et al.* Consistent effects of nitrogen fertilization on soil bacterial communities in black soils for two crop seasons in China. *Sci. Rep.* **7**, 3267 (2017).

2 Zhou, J. *et al.* Influence of 34-years of fertilization on bacterial communities in an intensively cultivated black soil in northeast China. *Soil Biol. Biochem.* **90**, 42-51 (2015).

3 Zhong, W. *et al.* The effects of mineral fertilizer and organic manure on soil microbial community and diversity. *Plant Soil* **326**, 511-522 (2010).

4 Zheng, Y., Zhang, L.-M., Zheng, Y.-M., Di, H. & He, J.-Z. Abundance and community composition of methanotrophs in a Chinese paddy soil under long-term fertilization practices. *J. Soil. Sediment.* **8**, 406-414 (2008).

5 Zheng, S. *et al.* Long-term fertilization regimes influence fame profiles of microbial communities in an arable sandy loam soil in northern China. *Pedobiologia* **56**, 179-183 (2013).

6 Zhao, Y.-N. *et al.* Carbon sequestration and soil microbes in purple paddy soil as affected by long-term fertilization. *Toxicol. Environ. Chem.* **97**, 464-476 (2015).

7 Zhao, G. R. *et al.* Long-term fertilizer use altered soil microbial community structure but not α-diversity in subtropical southwestern China. *Eurasian Soil Sci.* **55**, 1116-1125 (2022).

8 Zhang, Z. *et al.* Responses of soil micro-food web to long-term fertilization in a wheat-maize rotation system. *Appl. Soil Ecol.* **98**, 56-64 (2016).

9 Zhang, S. *et al.* Long-term fertilization altered microbial community structure in an aeolian sandy soil in northeast China. *Front. Microbiol.* **13**, 979759 (2022).

10 Zhang, J. *et al.* Long-term field fertilization affects soil nitrogen transformations in a rice-wheat-rotation cropping system. *Journal of Plant Nutrition and Soil Science* **175**, 939-946 (2012).

11 Zhang, H., Ding, W., Yu, H. & He, X. Linking organic carbon accumulation to microbial community dynamics in a sandy loam soil: Result of 20 years compost and inorganic fertilizers repeated application experiment. *Biol. Fert. Soils* **51**, 137-150 (2015).

12 Zhang, H. *et al.* Temporal responses of microorganisms and native organic carbon mineralization to 13C-glucose addition in a sandy loam soil with long-term fertilization. *Eur. J. Soil Biol.* **74**, 16-22 (2016).

13 Zhang, C. *et al.* Long-term warming and nitrogen fertilization affect C-, N- and P-acquiring hydrolase and oxidase activities in winter wheat monocropping soil. *Sci. Rep.* **11**, 18542 (2021).

14 Yuan, Y. *et al.* Effects of nitrogen fertilizer on *Nitrospira*- and *Nitrobacter*-like nitrite-oxidizing bacterial microbial communities under mulched fertigation system in semi-arid area of northeast China. *Agronomy* **13**, 2909 (2023).

15 Yuan, H. *et al.* Soil microbial biomass and bacterial and fungal community structures responses to long-term fertilization in paddy soils. *J. Soil. Sediment.* **13**, 877-886 (2013).

16 Yu, W.-T., Xu, Y.-G., Bi, M.-L., Ma, Q. & Zhou, H. Activity and composition of ammonia-oxidizing bacteria in an aquic brown soil as influenced by land use and fertilization. *Pedosphere* **20**, 789-798 (2010).

17 Yu, C. *et al.* Effects of long-term straw retention on soil microorganisms under a rice-wheat cropping system. *Arch. Microbiol.* **202**, 1915-1927 (2020).

18 Yoon, S. *et al.* Long-term inorganic and organic fertilizations affect CH4 oxidation potential and methanotrophic community structure in paddy soils. *Korean J. Soil Sci. Fert.* **55**, 475-487 (2022).

19 Ying, D., Chen, X., Hou, J., Zhao, F. & Li, P. Soil properties and microbial functional attributes drive the response of soil multifunctionality to long-term fertilization management. *Appl. Soil Ecol.* **192**, 105095 (2023).

20 Ye, G. *et al.* Long-term application of manure over plant residues mitigates acidification, builds soil organic carbon and shifts prokaryotic diversity in acidic ultisols. *Appl. Soil Ecol.* **133**, 24-33 (2019).

21 Ye, G. *et al.* Short-term cellulose addition decreases microbial diversity and network complexity in an ultisol following 32-year fertilization. *Agr. Ecosyst. Environ.* **325**, 107744 (2022).

22 Yao, Z. *et al.* Soil micro-food webs at aggregate scale are associated with soil nitrogen supply and crop yield. *Geoderma* **442**, 116801 (2024).

23 Yang, K. *et al.* Microbial mechanisms of the priming effect over 12 years of different amounts of nitrogen management. *Agronomy* **13**, 1783 (2023).

24 Yang, F. *et al.* Functional soil organic matter fractions, microbial community, and enzyme activities in a mollisol under 35 years manure and mineral fertilization. *J. Soil Sci. Plant Nutr.* **19**, 430-439 (2019).

25 Xun, W. *et al.* Significant alteration of soil bacterial communities and organic carbon decomposition by different long-term fertilization management conditions of extremely low-productivity arable soil in south China. *Environ. Microbiol.* **18**, 1907-1917 (2016).

26 Xun, W. *et al.* Long-term organic-inorganic fertilization ensures great soil productivity and bacterial diversity after natural-to-agricultural ecosystem conversion. *J. Microbiol.* **54**, 611-617 (2016).

27 Xu, Y., Peng, Z., Tu, Y. & Huang, J. Combining organic and inorganic fertilization increases rice yield and soil nitrogen and carbon: Dissolved organic matter chemodiversity and soil microbial communities. *Plant Soil* **492**, 557-571 (2023).

28 Xu, P. *et al.* Influence mechanisms of long-term fertilizations on the mineralization of organic matter in ultisol. *Soil Till. Res.* **201**, 104594 (2020).

29 Xu, A. *et al.* Changes in ammonia-oxidizing archaea and bacterial communities and soil nitrogen dynamics in response to long-term nitrogen fertilization. *Int. J. Env. Res. Pub. He.* **19**, 19052732 (2022).

30 Xiong, L. *et al.* The divergent accumulation mechanisms of microbial necromass C in paddy soil under different long-term fertilization regimes. *Geoderma* **439**, 116688 (2023).

31 Xie, W.-Y. *et al.* Long-term effects of manure and chemical fertilizers on soil antibiotic resistome. *Soil Biol. Biochem.* **122**, 111-119 (2018).

32 Xie, W. *et al.* Short-term effects of copper, cadmium and cypermethrin on dehydrogenase activity and microbial functional diversity in soils after long-term mineral or organic fertilization. *Agr. Ecosyst. Environ.* **129**, 450-456 (2009).

33 Xiang, X. *et al.* Divergence in fungal abundance and community structure between soils under long-term mineral and organic fertilization. *Soil Till. Res.* **196**, 104491 (2020).

34 Wu, W.-F. *et al.* Nitrogen fertilization modulates rice phyllosphere functional genes and pathogens through fungal communities. *Sci. Total Environ.* **929**, 172622 (2024).

35 Wu, L. *et al.* Soil organic matter priming and carbon balance after straw addition is regulated by long-term fertilization. *Soil Biol. Biochem.* **135**, 383-391 (2019).

36 Wu, L. *et al.* Changes in soil bacterial community and enzyme activity under five years straw returning in paddy soil. *Eur. J. Soil Biol.* **100**, 103215 (2020).

37 Wu, F.-s. *et al.* The community structure of microbial in arable soil under different long-term fertilization regimes in the loess plateau of China. *Afr. J. Microbiol. Res.* **6**, 6152-6164 (2012).

38 Wu, F. *et al.* Effects of long-term fertilization on AM fungal community structure and glomalin-related soil protein in the loess plateau of China. *Plant Soil* **342**, 233-247 (2011).

39 Wu, D. *et al.* Phosphorus and zinc are strongly associated with belowground fungal communities in wheat field under long-term fertilization. *Microbiol. spectr.* **10**, e0011022 (2022).

40 Wood, S. A. *et al.* Agricultural intensification and the functional capacity of soil microbes on smallholder african farms. *J. Appl. Ecol.* **52**, 744-752 (2015).

41 Wessen, E., Hallin, S. & Philippot, L. Differential responses of bacterial and archaeal groups at high taxonomical ranks to soil management. *Soil Biol. Biochem.* **42**, 1759-1765 (2010).

42 Wei, W. *et al.* Long-term fertilization coupled with rhizobium inoculation promotes soybean yield and alters soil bacterial community composition. *Front. Microbiol.* **14**, 1161983 (2023).

43 Wang, Y. *et al.* Nitrogen and phosphorus fertilization leads to soil arbuscular mycorrhizal fungal diversity changes and rainfed crop yield increase on the loess plateau of China: A 37-year study. *Pedosphere* **34**, 328-338 (2024).

44 Wang, Y. *et al.* Different selectivity in fungal communities between manure and mineral fertilizers: A study in an alkaline soil after 30 years fertilization. *Front. Microbiol.* **9**, 2613 (2018).

45 Wang, Y., Ji, H. & Gao, C. Differential responses of soil bacterial taxa to long-term P, N, and organic manure application. *J. Soil. Sediment.* **16**, 1046-1058 (2016).

46 Wang, Q.-q. *et al.* Long-term fertilization leads to specific plfa finger-prints in chinese hapludults soil. *J. Integr. Agric.* **19**, 1354-1362 (2020).

47 Wang, L. *et al.* Long-term organic fertilization strengthens the soil phosphorus cycle and phosphorus availability by regulating the *pqqc*- and *phod*-harboring bacterial communities. *Microb. Ecol.* **86**, 2716-2732 (2023).

48 Wang, J. L. *et al.* Microbial keystone taxa drive crop productivity through shifting aboveground-belowground mineral element flows. *Sci. Total Environ.* **811**, 152342 (2022).

49 Wang, J., Wang, J., Rhodes, G., He, J.-Z. & Ge, Y. Adaptive responses of comammox *Nitrospira* and canonical ammonia oxidizers to long-term fertilizations: Implications for the relative contributions of different ammonia oxidizers to soil nitrogen cycling. *Sci. Total Environ.* **668**, 224-233 (2019).

50 Wang, J., Rhodes, G., Huang, Q. & Shen, Q. Plant growth stages and fertilization regimes drive soil fungal community compositions in a wheat-rice rotation system. *Biol. Fert. Soils* **54**, 731-742 (2018).

51 Wang, J. *et al.* Significant dose effects of fertilizers on soil diazotrophic diversity, community composition, and assembly processes in a long-term paddy field fertilization experiment. *Land Degrad. Dev.* **32**, 420-429 (2021).

52 Wang, F. *et al.* The active functional microbes contribute differently to soil nitrification and denitrification potential under long-term fertilizer regimes in North-east China. *Front. Microbiol.* **13**, 1021080 (2022).

53 Wang, C. *et al.* Impact of 25 years of inorganic fertilization on diazotrophic abundance and community structure in an acidic soil in southern China. *Soil Biol. Biochem.* **113**, 240-249 (2017).

54 Wang, C. *et al.* Integrated organic and inorganic fertilization and reduced irrigation altered prokaryotic microbial community and diversity in different compartments of wheat root zone contributing to improved nitrogen uptake and wheat yield. *Sci. Total Environ.* **842**, 156952 (2022).

55 Wan, Z. *et al.* *nirS* and *nosZII* bacterial denitrifiers as well as fungal denitrifiers are coupled with N2O emissions in long-term fertilized soils. *Sci. Total Environ.* **897**, 165426 (2023).

56 Villenave, C. *et al.* Influence of long-term organic and mineral fertilization on soil nematofauna when growing sorghum bicolor in burkina faso. *Biol. Fert. Soils* **46**, 659-670 (2010).

57 Viketoft, M., Riggi, L. G. A., Bommarco, R., Hallin, S. & Taylor, A. R. Type of organic fertilizer rather than organic amendment per se increases abundance of soil biota. *PeerJ* **9**, e11204 (2021).

58 Verdenelli, R. A. *et al.* Effect of long-term mineral fertilisation on soil microbial abundance, community structure and diversity in a typic hapludoll under intensive farming systems. *Ann. Appl. Biol.* **175**, 363-375 (2019).

59 Verdenelli, R. A. *et al.* Influence of 12-years of nps fertilization on soil quality, microbial community profile and activity under conservation agricultural management. *Cienc. Suelo* **36**, 99-109 (2018).

60 Ullah, S. *et al.* The response of soil fungal diversity and community composition to long-term fertilization. *Appl. Soil Ecol.* **140**, 35-41 (2019).

61 Tian, J. *et al.* Response of soil organic matter fractions and composition of microbial community to long-term organic and mineral fertilization. *Biol. Fert. Soils* **53**, 523-532 (2017).

62 Tian, H., Drijber, R. A., Zhang, J. L. & Li, X. L. Impact of long-term nitrogen fertilization and rotation with soybean on the diversity and phosphorus metabolism of indigenous arbuscular mycorrhizal fungi within the roots of maize (*Zea mays* L.). *Agr. Ecosyst. Environ.* **164**, 53-61 (2013).

63 Tang, Y. *et al.* Impact of fertilization regimes on diazotroph community compositions and N2-fixation activity in paddy soil. *Agr. Ecosyst. Environ.* **247**, 1-8 (2017).

64 Tang, J. *et al.* Biogas slurry as an alternative to chemical fertilizer: Changes in soil properties and microbial communities of fluvo-aquic soil in the north China plain. *Sustainability* **14**, 15099 (2022).

65 Tang, H. *et al.* Effects of long-term fertilization on *nifH* gene diversity in agricultural black soil. *Afr. J. Microbiol. Res.* **6**, 2659-2666 (2012).

66 Tang, H. *et al.* Effects of long-term fertilizer management on soil bacterial diversity in double-cropping paddy field of southern China. *Agron. J.* **112**, 3644-3652 (2020).

67 Sun, R., Guo, X., Wang, D. & Chu, H. Effects of long-term application of chemical and organic fertilizers on the abundance of microbial communities involved in the nitrogen cycle. *Appl. Soil Ecol.* **95**, 171-178 (2015).

68 Sun, R. *et al.* Fungal community composition in soils subjected to long-term chemical fertilization is most influenced by the type of organic matter. *Environ. Microbiol.* **18**, 5137-5150 (2016).

69 Sun, L., Yu, Y., Petropoulos, E., Cui, X. & Wang, S. Long-term manure amendment sustains black soil biodiversity by mitigating acidification induced by chemical N fertilization. *Microorganisms* **11**, 11010064 (2023).

70 Su, J.-Q. *et al.* Long-term balanced fertilization increases the soil microbial functional diversity in a phosphorus-limited paddy soil. *Mol. Ecol.* **24**, 136-150 (2015).

71 Srour, A. Y. *et al.* Microbial communities associated with long-term tillage and fertility treatments in a corn-soybean cropping system. *Front. Microbiol.* **11**, 1363 (2020).

72 Soonvald, L., Loit, K., Runno-Paurson, E., Astover, A. & Tedersoo, L. The role of long-term mineral and organic fertilisation treatment in changing pathogen and symbiont community composition in soil. *Appl. Soil Ecol.* **141**, 45-53 (2019).

73 Song, A. *et al.* Keystone microbial taxa drive the accelerated decompositions of cellulose and lignin by long-term resource enrichments. *Sci. Total Environ.* **842**, 156814 (2022).

74 Soman, C., Li, D., Wander, M. M. & Kent, A. D. Long-term fertilizer and crop-rotation treatments differentially affect soil bacterial community structure. *Plant Soil* **413**, 145-159 (2017).

75 Shi, W. *et al.* Organic manure rather than phosphorus fertilization primarily determined asymbiotic nitrogen fixation rate and the stability of diazotrophic community in an upland red soil. *Agr. Ecosyst. Environ.* **319**, 107535 (2021).

76 Semenov, M. V., Ksenofontova, N. A., Nikitin, D. A., Tkhakakhova, A. K. & Lukin, S. M. Microbiological parameters of soddy-podzolic soil and its rhizosphere in a half-century field experiment with different fertilizer systems. *Eurasian Soil Sci.* **56**, 756-768 (2023).

77 Semenov, M. V., Krasnov, G. S., Semenov, V. M. & van Bruggen, A. Mineral and organic fertilizers distinctly affect fungal communities in the crop rhizosphere. *J. Fungi* **8**, 8030251 (2022).

78 Seghers, D. *et al.* Long-term effects of mineral versus organic fertilizers on activity and structure of the methanotrophic community in agricultural soils. *Environ. Microbiol.* **5**, 867-877 (2003).

79 Schwalb, S. A. *et al.* Long-term differences in fertilisation type change the bacteria:Archaea: Fungi ratios and reveal a heterogeneous response of the soil microbial ionome in a haplic luvisol. *Soil Biol. Biochem.* **177**, 108892 (2023).

80 Schmidt, J. *et al.* Effects of plant-symbiotic relationships on the living soil microbial community and microbial necromass in a long-term agro-ecosystem. *Sci. Total Environ.* **581**, 756-765 (2017).

81 Saha, S., Gopinath, K. A., Mina, B. L. & Gupta, H. S. Influence of continuous application of inorganic nutrients to a maize-wheat rotation on soil enzyme activity and grain quality in a rainfed indian soil. *Eur. J. Soil Biol.* **44**, 521-531 (2008).

82 Ramirez, K. S., Lauber, C. L., Knight, R., Bradford, M. A. & Fierer, N. Consistent effects of nitrogen fertilization on soil bacterial communities in contrasting systems. *Ecology* **91**, 3463-3470 (2010).

83 Qin, H. *et al.* Long-term fertilizer application effects on the soil, root arbuscular mycorrhizal fungi and community composition in rotation agriculture. *Appl. Soil Ecol.* **89**, 35-43 (2015).

84 Piazza, G., Ercoli, L., Nuti, M. & Pellegrino, E. Interaction between conservation tillage and nitrogen fertilization shapes prokaryotic and fungal diversity at different soil depths: Evidence from a 23-year field experiment in the mediterranean area. *Front. Microbiol.* **10**, 2047 (2019).

85 Peng, Z. *et al.* Mycorrhizal effects on crop yield and soil ecosystem functions in a long-term tillage and fertilization experiment. *New Phytol.* **242**, 1798-1813 (2024).

86 Pellegrino, E., Piazza, G., Helgason, T. & Ercoli, L. Microbiome structure and interconnection in soil aggregates across conservation and conventional agricultural practices allow to identify main prokaryotic and fungal taxa related to soil functioning. *Soil Biol. Biochem.* **175**, 108833 (2022).

87 Parmar, V., Datt, N., Dixit, S. P. & Rana, S. S. Long-term effect of prescription-based fertilization on culturable soil microorganisms and carbon dynamics in northwest himalayas. *Commun. Soil Sci. Plant Anal.* **55**, 398-410 (2024).

88 Pan, H. *et al.* Organic and inorganic fertilizers respectively drive bacterial and fungal community compositions in a fluvo-aquic soil in northern China. *Soil Till. Res.* **198**, 104540 (2020).

89 Ogilvie, L. A., Hirsch, P. R. & Johnston, A. W. B. Bacterial diversity of the broadbalk 'classical' winter wheat experiment in relation to long-term fertilizer inputs. *Microb. Ecol.* **56**, 525-537 (2008).

90 Ning, Q. *et al.* Multiple long-term observations reveal a strategy for soil pH-dependent fertilization and fungal communities in support of agricultural production. *Agr. Ecosyst. Environ.* **293**, 106837 (2020).

91 Nie, S. a. *et al.* Response of activity, abundance, and composition of anammox bacterial community to different fertilization in a paddy soil. *Biol. Fert. Soils* **54**, 977-984 (2018).

92 Murase, J. *et al.* Impact of long-term fertilizer treatment on the microeukaryotic community structure of a rice field soil. *Soil Biol. Biochem.* **80**, 237-243 (2015).

93 Muema, E. K., Cadisch, G., Musyoki, M. K. & Rasche, F. Dynamics of bacterial and archaeal *amoA* gene abundance after additions of organic inputs combined with mineral nitrogen to an agricultural soil. *Nutr. Cycl. Agroecosys.* **104**, 143-158 (2016).

94 Mohanty, S. R. *et al.* Nitrification under the influence of long-term fertilizer application in a tropical vertisol. *Arch. Agron. Soil Sci.* **68**, 516-530 (2022).

95 Miura, T. *et al.* The effects of nitrogen fertilizer on soil microbial communities under conventional and conservation agricultural managements in a tropical clay-rich ultisol. *Soil Sci.* **181**, 68-74 (2016).

96 Miao, Y. *et al.* Long-term compost amendment spurs cellulose decomposition by driving shifts in fungal community composition and promoting fungal diversity and phylogenetic relatedness. *mBio* **13**, e0032322 (2022).

97 Mensik, L., Hlisnikovsky, L., Pospisilova, L. & Kunzova, E. The effect of application of organic manures and mineral fertilizers on the state of soil organic matter and nutrients in the long-term field experiment. *J. Soil. Sediment.* **18**, 2813-2822 (2018).

98 Meng, X. *et al.* Nitrogen fertilizer builds soil organic carbon under straw return mainly via microbial necromass formation. *Soil Biol. Biochem.* **188**, 109223 (2024).

99 Megyes, M., Borsodi, A. K., Arendas, T. & Marialigeti, K. Variations in the diversity of soil bacterial and archaeal communities in response to different long-term fertilization regimes in maize fields. *Appl. Soil Ecol.* **168**, 104120 (2021).

100 Mayer, J. *et al.* Productivity, quality and sustainability of winter wheat under long-term conventional and organic management in switzerland. *Eur. J. Agron.* **65**, 27-39 (2015).

101 Mandal, A., Patra, A. K., Singh, D., Swarup, A. & Ebhin Masto, R. Effect of long-term application of manure and fertilizer on biological and biochemical activities in soil during crop development stages. *Bioresour. Technol.* **98**, 3585-3592 (2007).

102 Mackiewicz-Walec, E., Krzebietke, S. J., Borowik, A. & Klasa, A. The effect of spring barley fertilization on the content of polycyclic aromatic hydrocarbons, microbial counts and enzymatic activity in soil. *Int. J. Env. Res. Pub. He.* **20**, 20053796 (2023).

103 Ma, Y. *et al.* Differential responses of arbuscular mycorrhizal fungal communities to long-term fertilization in the wheat rhizosphere and root endosphere. *Appl. Environ. Microb.* **87**, e0034921 (2021).

104 Ma, T. *et al.* Long-term organic-inorganic fertilization regimes alter bacterial and fungal communities and rice yields in paddy soil. *Front. Microbiol.* **13**, 890712 (2022).

105 Ma, Q. *et al.* Fertilizer regime changes the competitive uptake of organic nitrogen by wheat and soil microorganisms: An *in-situ* uptake test using 13C, 15N labelling, and 13C-PLFA analysis. *Soil Biol. Biochem.* **125**, 319-327 (2018).

106 Ma, L. *et al.* Divergent responses of bacterial activity, structure, and co-occurrence patterns to long-term unbalanced fertilization without nitrogen, phosphorus, or potassium in a cultivated vertisol. *Environ. Sci. Pollut. R.* **26**, 12741-12754 (2019).

107 Lv, X., Ma, B., Sun, L., Cai, Y. & Chang, S. X. Long-term nitrogen fertilization, but not short-term tillage reversal, affects bacterial community structure and function in a no-till soil. *J. Soil. Sediment.* **22**, 630-639 (2022).

108 Luo, X. *et al.* Arbuscular mycorrhizal fungal communities of topsoil and subsoil of an annual maize-wheat rotation after 15-years of differential mineral and organic fertilization. *Agr. Ecosyst. Environ.* **315**, 107442 (2021).

109 Luo, G. *et al.* Deciphering the associations between soil microbial diversity and ecosystem multifunctionality driven by long-term fertilization management. *Funct. Ecol.* **32**, 1103-1116 (2018).

110 Liu, Y. *et al.* Long-term fertiliser (organic and inorganic) input effects on soil microbiological characteristics in hydromorphic paddy soils in China. *Soil Res.* **57**, 459-466 (2019).

111 Liu, S., Coyne, M. S. & Grove, J. H. Long-term tillage and nitrogen fertilization: Consequences for nitrifier density and activity. *Appl. Soil Ecol.* **120**, 121-127 (2017).

112 Liu, M. *et al.* Nitrogen leaching greatly impacts bacterial community and denitrifiers abundance in subsoil under long-term fertilization. *Agr. Ecosyst. Environ.* **294**, 106885 (2020).

113 Liu, L. *et al.* Thresholds of nitrogen and phosphorus input substantially alter arbuscular mycorrhizal fungal communities and wheat yield in dryland farmland. *J. Agr. Food Chem.* **72**, 10236-10246 (2024).

114 Liu, K. *et al.* Long-term fertilization promotes soil organic nitrogen accumulation by increasing the abundance of keystone microbial cluster across aggregates. *Appl. Soil Ecol.* **192**, 105086 (2023).

115 Liu, J., Zhang, J., Li, D., Xu, C. & Xiang, X. Differential responses of arbuscular mycorrhizal fungal communities to mineral and organic fertilization. *MicrobiologyOpen* **9**, e00920 (2020).

116 Liu, J. *et al.* Soil microbial community and network changes after long-term use of plastic mulch and nitrogen fertilization on semiarid farmland. *Geoderma* **396**, 115086 (2021).

117 Liu, B. *et al.* 14 year applications of chemical fertilizers and crop straw effects on soil labile organic carbon fractions, enzyme activities and microbial community in rice-wheat rotation of middle China. *Sci. Total Environ.* **841**, 156608 (2022).

118 Liu, B. *et al.* Impact of diversified cropping systems and fertilization strategies on soil microbial abundance and functional potentials for nitrogen cycling. *Sci. Total Environ.* **932**, 172954-172954 (2024).

119 Lin, Y. *et al.* Long-term application of lime or pig manure rather than plant residues suppressed diazotroph abundance and diversity and altered community structure in an acidic ultisol. *Soil Biol. Biochem.* **123**, 218-228 (2018).

120 Lin, X. *et al.* Long-term balanced fertilization decreases arbuscular mycorrhizal fungal diversity in an arable soil in north China revealed by 454 pyrosequencing. *Environ. Sci. Technol.* **46**, 5764-5771 (2012).

121 Liang, Y. *et al.* Differential responses of soil microbial n-cycling functional genes to 35 yr applications of chemical fertilizer and organic manure in wheat field soil on loess plateau. *Agronomy* **13**, 1516 (2023).

122 Lian, J. *et al.* Impact of long-term application of manure and inorganic fertilizers on common soil bacteria in different soil types. *Agr. Ecosyst. Environ.* **337**, 108044 (2022).

123 Li, Z. *et al.* Organic fertilizers incorporation increased microbial necromass accumulation more than mineral fertilization in paddy soil via altering microbial traits. *Appl. Soil Ecol.* **193**, 105137 (2024).

124 Li, Z. *et al.* Effect of long-term fertilization on decomposition of crop residues and their incorporation into microbial communities of 6-year stored soils. *Biol. Fert. Soils* **56**, 25-37 (2020).

125 Li, Y. *et al.* Changes of soil nitrogen fractions and *nirS*-type denitrifier microbial community in response to N fertilizer in the semi-arid area of northeast China. *Agronomy* **13**, 2212 (2023).

126 Li, Y., Tremblay, J., Bainard, L. D., Cade-Menun, B. & Hamel, C. Long-term effects of nitrogen and phosphorus fertilization on soil microbial community structure and function under continuous wheat production. *Environ. Microbiol.* **22**, 1066-1088 (2020).

127 Li, X. *et al.* Partial substitution of chemical fertilizer with organic fertilizer over seven years increases yields and restores soil bacterial community diversity in wheat-rice rotation. *Eur. J. Agron.* **133**, 126445 (2022).

128 Li, X., Deng, S., Raun, W. R., Wang, Y. & Teng, Y. Bacterial community in soils following century-long application of organic or inorganic fertilizers under continuous winter wheat cultivation. *Agronomy* **10**, 1497 (2020).

129 Li, W. X. *et al.* Fertilization strategies affect soil properties and abundance of N-cycling functional genes in an acidic agricultural soil. *Appl. Soil Ecol.* **156**, 103704 (2020).

130 Li, W. T. *et al.* Changes in soil aggregate-associated enzyme activities and nutrients under long-term chemical fertilizer applications in a phosphorus-limited paddy soil. *Soil Use Manage.* **33**, 25-33 (2017).

131 Li, W. *et al.* Soil multifunctionality predicted by bacterial network complexity explains differences in wheat productivity induced by fertilization management. *Eur. J. Agron.* **153**, 127058 (2024).

132 Li, R. *et al.* Fertilizing-induced alterations of microbial functional profiles in soil nitrogen cycling closely associate with crop yield. *Environ. Res.* **231**, 116194 (2023).

133 Li, J. *et al.* Long-term returning agricultural residues increases soil microbe-nematode network complexity and ecosystem multifunctionality. *Geoderma* **430**, 116340 (2023).

134 Li, J. *et al.* Response of soil organic carbon fractions, microbial community composition and carbon mineralization to high-input fertilizer practices under an intensive agricultural system. *PLoS ONE* **13**, e0195144 (2018).

135 Li, J., Wen, Y. & Yang, X. Understanding the responses of soil bacterial communities to long-term fertilization regimes using DNA and RNA sequencing. *Agronomy* **11**, 2425 (2021).

136 Li, J. *et al.* Changes in soil microbial communities in response to repeated application of nitrification inhibitors. *Appl. Soil Ecol.* **182**, 104726 (2023).

137 Li, J. *et al.* Microbial community structure and functional metabolic diversity are associated with organic carbon availability in an agricultural soil. *J. Integr. Agric.* **14**, 2500-2511 (2015).

138 Li, J. *et al.* Soil microbial community structure and function are significantly affected by long-term organic and mineral fertilization regimes in the north China plain. *Appl. Soil Ecol.* **96**, 75-87 (2015).

139 Li, F., Chen, L., Zhang, J., Yin, J. & Huang, S. Bacterial community structure after long-term organic and inorganic fertilization reveals important associations between soil nutrients and specific taxa involved in nutrient transformations. *Front. Microbiol.* **8**, 187 (2017).

140 Li, C.-x., Ma, S.-c., Shao, Y., Ma, S.-t. & Zhang, L.-l. Effects of long-term organic fertilization on soil microbiologic characteristics, yield and sustainable production of winter wheat. *J. Integr. Agric.* **17**, 210-219 (2018).

141 Li, C., Yan, K., Tang, L., Jia, Z. & Li, Y. Change in deep soil microbial communities due to long-term fertilization. *Soil Biol. Biochem.* **75**, 264-272 (2014).

142 Kuppusamy, S. *et al.* Agriculturally relevant microbial community structure in long-term fertilized paddy soils as revealed by phospholipid fatty acid (PLFA) and pyrosequencing analyses. *Arch. Agron. Soil Sci.* **64**, 1379-1393 (2018).

143 Kracmarova, M. *et al.* Soil microbial communities following 20 years of fertilization and crop rotation practices in the czech republic. *Environ. Microbiomes* **17**, 13 (2022).

144 Kou, Z. *et al.* Effects of nitrogen and phosphorus additions on soil microbial community structure and ecological processes in the farmland of chinese loess plateau. *J. Arid Land* **15**, 960-974 (2023).

145 Kong, W. *et al.* Contrasting response of soil microbiomes to long-term fertilization in various highland cropping systems. *ISME Commun.* **3**, 81-81 (2023).

146 Kokovic, N. *et al.* Changes in soil labile organic matter as affected by 50 years of fertilization with increasing amounts of nitrogen. *Agronomy* **11**, 2026 (2021).

147 Kirchmann, H., Schon, M., Borjesson, G., Hamner, K. & Katterer, T. Properties of soils in the swedish long-term fertility experiments: Vii. Changes in topsoil and upper subsoil at orja and fors after 50 years of nitrogen fertilization and manure application. *Acta Agr. Scand. B-s. P.* **63**, 25-36 (2013).

148 Khan, A., Li, T., He, B. & Zhang, G. Insights from fertilization and cultivation management for interpreting the variations in the quantity and quality of dissolved organic carbon and microbial community structure on purple soil sloping farmland in southwest China. *Agronomy* **14**, 426 (2024).

149 Jin, Z. *et al.* Impact of long-term fertilization on community structure of ammonia oxidizing and denitrifying bacteria based on *amoA* and *nirK* genes in a rice paddy from tai lake region, China. *J. Integr. Agric.* **13**, 2286-2298 (2014).

150 Jiao, X., Gao, C., Lue, G., & Sui, Y. Effect of long-term fertilization on soil enzyme activities under different hydrothermal conditions in northeast China. *Agric. Sci. China* **10**, 412-422 (2011).

151 Jiao, F., Zhang, D., Chen, Y., Wu, J. & Zhang, J. Effects of long-term straw returning and nitrogen fertilizer reduction on soil microbial diversity in black soil in Northeast China. *Agronomy* **13**, 2036 (2023).

152 Huang, Y. *et al.* Stoichiometric imbalance of soil carbon and nutrients drives microbial community structure under long-term fertilization. *Appl. Soil Ecol.* **168**, 104119 (2021).

153 Huang, X. *et al.* Long-term organic fertilization combined with deep ploughing enhances carbon sequestration in a rainfed sorghum-maize rotation system. *Geoderma* **442**, 116778 (2024).

154 Huang, L., Riggins, C. W., Rodriguez-Zas, S., Zabaloy, M. C. & Villamil, M. B. Long-term N fertilization imbalances potential N acquisition and transformations by soil microbes. *Sci. Total Environ.* **691**, 562-571 (2019).

155 Hu, X. *et al.* Effects of over 30-year of different fertilization regimes on fungal community compositions in the black soils of northeast China. *Agr. Ecosyst. Environ.* **248**, 113-122 (2017).

156 Hu, X. *et al.* Long-term application of nitrogen, not phosphate or potassium, significantly alters the diazotrophic community compositions and structures in a mollisol in northeast China. *Res. Microbiol.* **170**, 147-155 (2019).

157 Hu, W. *et al.* Long-term effects of fertilizer on soil enzymatic activity of wheat field soil in loess plateau, China. *Ecotoxicology* **23**, 2069-2080 (2014).

158 Hu, C. *et al.* Soil nematode abundances were increased by an incremental nutrient input in a paddy-upland rotation system. *Helminthologia* **55**, 322-333 (2018).

159 Hu, C., Li, S.-L., Qiao, Y., Liu, D.-H. & Chen, Y.-F. Effects of 30 years repeated fertilizer applications on soil properties, microbes and crop yields in rice-wheat cropping systems. *Exp. Agr.* **51**, 355-369 (2015).

160 Hu, C., Cao, Z. P., Chen, Y. F. & Dawson, R. Dynamics of soil microbial biomass carbon, mineral nitrogen and nitrogen mineralization in long-term field experiment, northern China. *J. Sustain. Agr.* **32**, 287-302 (2008).

161 Holik, L. *et al.* Soil microbial communities and enzyme activities after long-term application of inorganic and organic fertilizers at different depths of the soil profile. *Sustainability* **11**, 3251 (2019).

162 Hemkemeyer, M., Christensen, B. T., Martens, R. & Tebbe, C. C. Soil particle size fractions harbour distinct microbial communities and differ in potential for microbial mineralisation of organic pollutants. *Soil Biol. Biochem.* **90**, 255-265 (2015).

163 He, Z.-Y. *et al.* Fertilization has a greater effect than rhizosphere on community structures of comammox *Nitrospira* in an alkaline agricultural soil. *Appl. Soil Ecol.* **175**, 104456 (2022).

164 He, Y. T. *et al.* Long-term combined chemical and manure fertilizations increase soil organic carbon and total nitrogen in aggregate fractions at three typical cropland soils in China. *Sci. Total Environ.* **532**, 635-644 (2015).

165 He, X. *et al.* Effects of 18 years repeated n fertilizer applications on gross N transformation rates in a subtropical rain-fed purple soil. *Appl. Soil Ecol.* **189**, 104952 (2023).

166 He, M. *et al.* Long-term appropriate n management can continuously enhance gross n mineralization rates and crop yields in a maize-wheat rotation system. *Biol. Fert. Soils* **59**, 501-511 (2023).

167 Hartmann, M., Fliessbach, A., Oberholzer, H.-R. & Widmer, F. Ranking the magnitude of crop and farming system effects on soil microbial biomass and genetic structure of bacterial communities. *FEMS Microbiol. Ecol.* **57**, 378-388 (2006).

168 Hao, X., Han, X., Wang, S. & Li, L.-J. Dynamics and composition of soil organic carbon in response to 15 years of straw return in a mollisol. *Soil Till. Res.* **215**, 105221 (2022).

169 Han, S. *et al.* Shifts in *Nitrobacter*- and *Nitrospira*-like nitrite-oxidizing bacterial communities under long-term fertilization practices. *Soil Biol. Biochem.* **124**, 118-125 (2018).

170 Hallin, S., Jones, C. M., Schloter, M. & Philippot, L. Relationship between N-cycling communities and ecosystem functioning in a 50-year-old fertilization experiment. *ISME J.* **3**, 597-605 (2009).

171 Guo, Z. *et al.* Fertilization regime has a greater effect on soil microbial community structure than crop rotation and growth stage in an agroecosystem. *Appl. Soil Ecol.* **149**, 103510 (2020).

172 Guo, T. *et al.* Varying microbial utilization of straw-derived carbon with different long-term fertilization regimes explored by DNA stable-isotope probing. *Eur. J. Soil Biol.* **108**, 103379 (2022).

173 Guo, L. *et al.* Fertilization practices affect biological nitrogen fixation by modulating diazotrophic communities in an acidic soil in southern China. *Pedosphere* **33**, 301-311 (2023).

174 Govednik, A., Potocrik, Z., Eler, K., Mihelic, R. & Suhadolc, M. Combined effects of long-term tillage and fertilisation regimes on soil organic carbon, microbial biomass, and abundance of the total microbial communities and N-functional guilds. *Appl. Soil Ecol.* **188**, 104876 (2023).

175 Gong, H. *et al.* Linkages of soil and microbial stoichiometry to crop nitrogen use efficiency: Evidence from a long-term nitrogen addition experiment. *Catena* **240**, 107961 (2024).

176 Gollner, M. J., Wagentristl, H., Liebhard, P. & Friedel, J. K. Yield and arbuscular mycorrhiza of winter rye in a 40-year fertilisation trial. *Agron. Sustain. Dev.* **31**, 373-378 (2011).

177 Giacometti, C. *et al.* Chemical and microbiological soil quality indicators and their potential to differentiate fertilization regimes in temperate agroecosystems. *Appl. Soil Ecol.* **64**, 32-48 (2013).

178 Giacometti, C. *et al.* Microplate-scale fluorometric soil enzyme assays as tools to assess soil quality in a long-term agricultural field experiment. *Appl. Soil Ecol.* **75**, 80-85 (2014).

179 Ge, Y., Zhang, J.-b., Zhang, L.-m., Yang, M. & He, J.-z. Long-term fertilization regimes affect bacterial community structure and diversity of an agricultural soil in northern China. *J. Soil. Sediment.* **8**, 43-50 (2008).

180 Gao, N. *et al.* Microbial and isotopomer analysis of N2O production pathways in a calcareous film-mulched farmland. *Biol. Fert. Soils* **59**, 407-422 (2023).

181 Gao, J. *et al.* Changes in soil fertility under partial organic substitution of chemical fertilizer: A 33-year trial. *J. Sci. Food Agr.* **103**, 7424-7433 (2023).

182 Francioli, D. *et al.* Mineral vs. Organic amendments: Microbial community structure, activity and abundance of agriculturally relevant microbes are driven by long-term fertilization strategies. *Front. Microbiol.* **7**, 1446 (2016).

183 Feng, G. *et al.* Effect of biogas slurry on the soil properties and microbial composition in an annual ryegrass-silage maize rotation system over a five-year period. *Microorganisms* **12**, 12040716 (2024).

184 Feitosa de Souza, T. A. & Santos, D. Effects of using different host plants and long-term fertilization systems on population sizes of infective arbuscular mycorrhizal fungi. *Symbiosis* **76**, 139-149 (2018).

185 Fan, M., Li, J., Yan, W., Shi, H. & Zhouping, S. Shifts in the structure and function of wheat root-associated bacterial communities in response to long-term nitrogen addition in an agricultural ecosystem. *Appl. Soil Ecol.* **159**, 103852 (2021).

186 Fan, F. *et al.* Impacts of organic and inorganic fertilizers on nitrification in a cold climate soil are linked to the bacterial ammonia oxidizer community. *Microb. Ecol.* **62**, 982-990 (2011).

187 Fan, F., Li, Z., Wakelin, S. A., Yu, W. & Liang, Y. Mineral fertilizer alters cellulolytic community structure and suppresses soil cellobiohydrolase activity in a long-term fertilization experiment. *Soil Biol. Biochem.* **55**, 70-77 (2012).

188 Duan, N. *et al.* Identification of novel viruses and their microbial hosts from soils with long-term nitrogen fertilization and cover cropping management. *mSystems* **7**, e0057122 (2022).

189 Duan, N. *et al.* Composition of soil viral and bacterial communities after long-term tillage, fertilization, and cover cropping management. *Appl. Soil Ecol.* **177**, 104510 (2022).

190 Du, Y. *et al.* Nitrogen fertilizer is a key factor affecting the soil chemical and microbial communities in a mollisol. *Can. J. Microbiol.* **65**, 510-521 (2019).

191 Dong, W.-Y. *et al.* Changes in soil microbial community composition in response to fertilization of paddy soils in subtropical China. *Appl. Soil Ecol.* **84**, 140-147 (2014).

192 Domnariu, H., Postolache, C., Avramescu, S., Lacatusu, A.-R. & Partal, E. Long term effects of tillage and fertilization upon microbiota of a romanian chernozem under maize monoculture. *Geoderma Reg.* **28**, e00463 (2022).

193 Ding, J. *et al.* Effects of applying inorganic fertilizer and organic manure for 35 years on the structure and diversity of ammonia-oxidizing archaea communities in a chinese mollisols field. *MicrobiologyOpen* **9**, e00942 (2020).

194 Cui, X., Zhang, Y., Gao, J., Peng, F. & Gao, P. Long-term combined application of manure and chemical fertilizer sustained higher nutrient status and rhizospheric bacterial diversity in reddish paddy soil of central south China. *Sci. Rep.* **8**, 16554 (2018).

195 Cui, J. *et al.* Enzymatic stoichiometry reveals phosphorus limitation-induced changes in the soil bacterial communities and element cycling: Evidence from a long-term field experiment. *Geoderma* **426**, 116124 (2022).

196 Clark, I. M., Buchkina, N., Jhurreea, D., Goulding, K. W. T. & Hirsch, P. R. Impacts of nitrogen application rates on the activity and diversity of denitrifying bacteria in the broadbalk wheat experiment. *Philosophical Transactions of the Royal Society B-Biological Sciences* **367**, 1235-1244 (2012).

197 Chu, H. *et al.* Community structure of ammonia-oxidizing bacteria under long-term application of mineral fertilizer and organic manure in a sandy loam soil. *Appl. Environ. Microb.* **73**, 485-491 (2007).

198 Chu, B., Zaid, F. & Eivazi, F. Long-term effects of different cropping systems on selected enzyme activities. *Commun. Soil Sci. Plant Anal.* **47**, 720-730 (2016).

199 Choudhary, M. *et al.* Long-term effects of organic manure and inorganic fertilization on biological soil quality indicators of soybean-wheat rotation in the indian mid-himalaya. *Appl. Soil Ecol.* **157**, 103754 (2021).

200 Chinnadurai, C., Gopalaswamy, G. & Balachandar, D. Long term effects of nutrient management regimes on abundance of bacterial genes and soil biochemical processes for fertility sustainability in a semi-arid tropical alfisol. *Geoderma* **232**, 563-572 (2014).

201 Chen, X. *et al.* Functional differentiation of nitrate-reducing isolates regulated by long-term fertilization in a rice paddy soil. *Can. J. Soil Sci.* **101**, 125-133 (2021).

202 Chen, X., Henriksen, T. M., Svensson, K. & Korsaeth, A. Long-term effects of agricultural production systems on structure and function of the soil microbial community. *Appl. Soil Ecol.* **147**, 103387 (2020).

203 Chen, X. *et al.* Land use and mineral fertilization influence soil microbial biomass and residues: A case study of a chinese mollisol. *Eur. J. Soil Biol.* **100**, 103216 (2020).

204 Chen, Q., Xin, Y. & Liu, Z. Long-term fertilization with potassium modifies soil biological quality in K-rich soils. *Agronomy* **10**, 771 (2020).

205 Chen, Q., Liu, Z., Zhou, J., Xu, X. & Zhu, Y. Long-term straw mulching with nitrogen fertilization increases nutrient and microbial determinants of soil quality in a maize-wheat rotation on China's loess plateau. *Sci. Total Environ.* **775**, 145930 (2021).

206 Chen, L. *et al.* Effect of different long-term fertilization regimes on the viral community in an agricultural soil of southern China. *Eur. J. Soil Biol.* **62**, 121-126 (2014).

207 Chen, L. *et al.* Linking cropland ecosystem services to microbiome taxonomic composition and functional composition in a sandy loam soil with 28-year organic and inorganic fertilizer regimes. *Appl. Soil Ecol.* **139**, 1-9 (2019).

208 Chen, L. *et al.* Organic amendment mitigates the negative impacts of mineral fertilization on bacterial communities in shajiang black soil. *Appl. Soil Ecol.* **150**, 103457 (2020).

209 Chen, J. *et al.* Living and dead microorganisms in mediating soil carbon stocks under long-term fertilization in a rice-wheat rotation. *Front. Microbiol.* **13**, 854216 (2022).

210 Chen, H. *et al.* Long-term organic and inorganic fertilization alters the diazotrophic abundance, community structure, and co-occurrence patterns in a vertisol. *Sci. Total Environ.* **766**, 142441 (2021).

211 Chen, H. *et al.* Linking nitrogen- and straw-sensitive indicator species and their co-occurrences to priming effect in agricultural soil exposed to long-term nitrogen fertilization. *Soil Biol. Biochem.* **176**, 108881 (2023).

212 Chen, C. *et al.* Microbial communities of an arable soil treated for 8 years with organic and inorganic fertilizers. *Biol. Fert. Soils* **52**, 455-467 (2016).

213 Chang, E.-H., Wang, C.-H., Chen, C.-L. & Chung, R.-S. Effects of long-term treatments of different organic fertilizers complemented with chemical n fertilizer on the chemical and biological properties of soils. *Soil Sci. Plant Nutr.* **60**, 499-511 (2014).

214 Chakraborty, A., Chakrabarti, K., Chakraborty, A. & Ghosh, S. Effect of long-term fertilizers and manure application on microbial biomass and microbial activity of a tropical agricultural soil. *Biol. Fert. Soils* **47**, 227-233 (2011).

215 Cardinale, M. *et al.* The response of the soil microbiota to long-term mineral and organic nitrogen fertilization is stronger in the bulk soil than in the rhizosphere. *Genes* **11**, 11040456 (2020).

216 Bolo, P. *et al.* Influence of farmyard manure application on potential zinc solubilizing microbial species abundance in a ferralsol of western kenya. *Agriculture* **13**, 2217 (2023).

217 Antunes, P. M., Lehmann, A., Hart, M. M., Baumecker, M. & Rillig, M. C. Long-term effects of soil nutrient deficiency on arbuscular mycorrhizal communities. *Funct. Ecol.* **26**, 532-540 (2012).

218 Anandakumar, S. *et al.* Impact of long-term nutrient management on sequestration and dynamics of soil organic carbon in a semi-arid tropical alfisol of india. *Appl. Soil Ecol.* **177**, 104549 (2022).

219 Ai, C. *et al.* Distinct responses of soil bacterial and fungal communities to changes in fertilization regime and crop rotation. *Geoderma* **319**, 156-166 (2018).

220 Ai, C., Liang, G., Sun, J., Wang, X. & Zhou, W. Responses of extracellular enzyme activities and microbial community in both the rhizosphere and bulk soil to long-term fertilization practices in a fluvo-aquic soil. *Geoderma* **173**, 330-338 (2012).

221 Ai, C. *et al.* Different roles of rhizosphere effect and long-term fertilization in the activity and community structure of ammonia oxidizers in a calcareous fluvo-aquic soil. *Soil Biol. Biochem.* **57**, 30-42 (2013).

222 Ahn, J.-H. *et al.* Dynamics of bacterial communities in rice field soils as affected by different long-term fertilization practices. *J. Microbiol.* **54**, 724-731 (2016).

223 Ahlawat, O. P. *et al.* Impact of long-term application of organic manure on inceptisol properties, grain protein content and yield of wheat. *Commun. Soil Sci. Plant Anal.* **54**, 1848-1864 (2023).

224 Ahamadou, B. *et al.* Microcalorimetric assessment of microbial activity in long-term fertilization experimental soils of southern China. *FEMS Microbiol. Ecol.* **70**, 186-195 (2009).

225 Abdalla, K. *et al.* Long-term continuous farmyard manure application increases soil carbon when combined with mineral fertilizers due to lower priming effects. *Geoderma* **428**, 116216 (2022).

**Reference**

1 Vance, E. D., Brookes, P. C. & Jenkinson, D. S. An extraction method for measuring soil microbial biomass c. *Soil Biol. Biochem.* **19**, 703-707 (1987).

2 Frostegård, Å., Bååth, E. & Tunlio, A. Shifts in the structure of soil microbial communities in limed forests as revealed by phospholipid fatty acid analysis. *Soil Biol. Biochem.* **25**, 723-730 (1993).

3 Zhang, Y. *et al.* High turnover rate of free phospholipids in soil confirms the classic hypothesis of PLFA methodology. *Soil Biol. Biochem.* **135**, 323-330 (2019).

4 Joergensen, R. G. Phospholipid fatty acids in soil—drawbacks and future prospects. *Biol. Fert. Soils* **58**, 1-6 (2022).

5 Bolyen, E. *et al.* Reproducible, interactive, scalable and extensible microbiome data science using QIIME 2. *Nat. Biotechnol.* **37**, 852-857 (2019).

6 Callahan, B. J. *et al.* DADA2: High-resolution sample inference from illumina amplicon data. *Nat. Methods* **13**, 581-583 (2016).

7 Kieft, K., Adams, A., Salamzade, R., Kalan, L. & Anantharaman, K. vRhyme enables binning of viral genomes from metagenomes. *Nucleic Acids Res.* **50**, e83-e83 (2022).

8 Olm, M. R., Brown, C. T., Brooks, B. & Banfield, J. F. dRep: A tool for fast and accurate genomic comparisons that enables improved genome recovery from metagenomes through de-replication. *ISME J.* **11**, 2864-2868 (2017).

9 Langmead, B. & Salzberg, S. L. Fast gapped-read alignment with Bowtie 2. *Nat. Methods* **9**, 357-359 (2012).

10 Verchot, L. V. & Borelli, T. Application of *para*-nitrophenol (*p*NP) enzyme assays in degraded tropical soils. *Soil Biol. Biochem.* **37**, 625-633 (2005).

11 Halstead, R. L. Phosphatase activity of soils as influenced by lime and other treatments. *Can. J. Soil Sci.* **44**, 137-144 (1964).

12 Daughtridge, R. C., Nakayama, Y. & Margenot, A. J. Sources of abiotic hydrolysis of chromogenic substrates in soil enzyme assays: Storage, termination, and incubation. *Soil Biol. Biochem.* **158**, 108245 (2021).

13 Burke, D. J., Weintraub, M. N., Hewins, C. R. & Kalisz, S. Relationship between soil enzyme activities, nutrient cycling and soil fungal communities in a northern hardwood forest. *Soil Biol. Biochem.* **43**, 795-803 (2011).

14 Jassey, V. E. J., Chiapusio, G., Gilbert, D., Toussaint, M.-L. & Binet, P. Phenoloxidase and peroxidase activities in sphagnum-dominated peatland in a warming climate. *Soil Biol. Biochem.* **46**, 49-52 (2012).

15 Miller, G. L. Use of dinitrosalicylic acid reagent for determination of reducing sugar. *Anal. Chem.* **31**, 426-428 (1959).

16 Chander, K. & Brookes, P. C. Is the dehydrogenase assay invalid as a method to estimate microbial activity in copper-contaminated soils? *Soil Biol. Biochem.* **23**, 909-915 (1991).

17 Houseman, G. R., Mittelbach, G. G., Reynolds, H. L. & Gross, K. L. Perturbations alter community convergence, divergence, and formation of multiple community states. *Ecology* **89**, 2172-2180 (2008).

18 García Criado, M. *et al.* Plant diversity dynamics over space and time in a warming arctic. *Nature* **642**, 653-661 (2025).

19 Wulahati Adalibieke *et al.* Global crop-specific nitrogen fertilization dataset in 1961-2020. *National Tibetan Plateau / Third Pole Environment Data Center* (2023).

20 Yang, Y. *et al.* Robust point and variance estimation for meta-analyses with selective reporting and dependent effect sizes. *Methods Ecol. Evol.* **15**, 1593-1610 (2024).
